## Gut Microbiome Compositional and Functional Features Associate with Alzheimer's Disease Pathology

### 1 Title: Gut microbiome compositional and functional features associate with 2 Alzheimer's disease pathology

3

#### 4 Authors:

5 Jea Woo Kang<sup>1\*</sup>, Lora A. Khatib<sup>2,3\*</sup>, Margo B. Heston<sup>1\*</sup>, Amanda H. Dilmore<sup>2</sup>, Jennifer S.  
6 Labus<sup>4,5,6</sup>, Yuetiva Deming<sup>1</sup>, Leyla Schimmel<sup>7</sup>, Colette Blach<sup>8</sup>, Daniel McDonald<sup>2</sup>, Antonio  
7 Gonzalez<sup>2</sup>, MacKenzie Bryant<sup>2</sup>, Karenina Sanders<sup>2</sup>, □ara Schwartz<sup>2</sup>, Tyler K. Ulland<sup>1,9</sup>, Sterling  
8 C. Johnson<sup>1</sup>, Sanjay Asthana<sup>1</sup>, Cynthia M. Carlsson<sup>1</sup>, Nathaniel A. Chin<sup>1</sup>, Kaj Blennow<sup>10</sup>, Henrik  
9 Zetterberg<sup>10,11,12,13,14,1</sup>, Federico E. Rey<sup>15</sup>, Alzheimer Gut Microbiome Project Consortium<sup>7</sup>, Rima  
10 Kaddurah-Daouk<sup>7,16,17</sup>, Rob Knight<sup>2,18,19,20,21</sup>, and Barbara B. Bendlin<sup>1,22,#</sup>

11

12 \*These three authors contributed equally to this work.

13 #Correspondence

#### 14 Affiliations and addresses:

- 15 1. Wisconsin Alzheimer's Disease Research Center, University of Wisconsin School of  
16 Medicine and Public Health, University of Wisconsin-Madison, Madison, WI, USA  
17 Address: 600 Highland Ave, J5/1 Mezzanine, Madison, WI, USA 53792
- 18 2. Department of Pediatrics, University of California San Diego, La Jolla, California, USA  
19 Address: 9461 Gilman Dr, La Jolla, CA, USA 92093
- 20 3. Neurosciences Graduate Program, University of California San Diego, La Jolla, California,  
21 USA  
22 Address: 9500 Gilman Dr, La Jolla, CA, USA 92093
- 23 4. Integrative Biostatistics and Bioinformatics Core (IBBC) at the Goodman-Luskin Microbiome  
24 Center  
25 Address: 42-210 CHS, Los Angeles, CA, USA 90095
- 26 5. G. Oppenheimer Center for Neurobiology of Stress and Resilience  
27 Address: 10833 Le Conte Ave, Los Angeles, CA, USA 90095
- 28 6. UCLA Vatche and Tamar Manoukian Division of Digestive Diseases, David Geffen School of  
29 Medicine at UCLA  
30 Address: 100 Medical Plaza, Los Angeles, CA, USA 90095
- 31 7. Department of Psychiatry and Behavioral Sciences, Duke University, Durham, NC, USA  
32 Address: 905 W Main St, Durham, NC, USA 27701
- 33 8. Duke Molecular Physiology Institute, Duke University, Durham, NC, USA  
34 Address: 300 N Duke St, Durham, NC, USA 27701
- 35 9. Department of Pathology and Laboratory Medicine, University of Wisconsin-Madison,  
36 Madison, WI, USA  
37 Address: 1685 Highland Ave, Madison, WI, USA 53705
- 38 10. Department of Psychiatry and Neurochemistry, Institute of Neuroscience and Physiology,  
39 the Sahlgrenska Academy at the University of Gothenburg, Mölndal, Sweden

## Gut Microbiome Compositional and Functional Features Associate with Alzheimer's Disease Pathology

- 40 Address: Blå stråket 15, vån 3 SU/Sahlgrenska 413 45 Göteborg, Sweden
- 41 **11.** Clinical Neurochemistry Laboratory, Sahlgrenska University Hospital, Mölndal, Sweden
- 42 Address: Blå stråket 5, 413 45 Göteborg, Sweden
- 43 **12.** Department of Neurodegenerative Disease, UCL Institute of Neurology, Queen Square,
- 44 London, UK
- 45 Address: Queen Square, London WC1N 3BG, United Kingdom
- 46 **13.** UK Dementia Research Institute at UCL, London, UK
- 47 Address: 6th Floor, Maple House, Tottenham Ct Rd, London W1T 7NF, United Kingdom
- 48 **14.** Hong Kong Center for Neurodegenerative Diseases, Clear Water Bay, Hong Kong, China
- 49 Address: Units 1501-1502, 1512-1518, 15/F, Building 17W, Hong Kong Science Park,
- 50 Shatin, N.T., Hong Kong
- 51 **15.** Department of Bacteriology, University of Wisconsin-Madison, Madison, WI, USA
- 52 Address: 1550 Linden Dr, Madison, WI, USA 53706
- 53 **16.** Duke Institute of Brain Sciences, Duke University, Durham, NC, USA
- 54 Address: 308 Research Dr, Durham, NC, USA 27710
- 55 **17.** Department of Medicine, Duke University, Durham, NC, USA
- 56 Address: 40 Duke Medicine Circle, 124 Davison Building, Durham, NC, USA 27710
- 57 **18.** Center for Microbiome Innovation, Joan and Irwin Jacobs School of Engineering, University
- 58 of California San Diego, La Jolla, California, USA
- 59 Address: Franklin Antonio Hall, Jacobs School of Engineering, 9500 Gilman Dr, La Jolla,
- 60 CA, USA 92093
- 61 **19.** Department of Computer Science and Engineering, University of California, San Diego, La
- 62 Jolla, CA, USA
- 63 Address: 3235 Voigt Dr, La Jolla, CA, USA 92093
- 64 **20.** Halicioğlu Data Science Institute, University of California, San Diego, La Jolla, CA, USA
- 65 Address: 3234 Matthews Ln, La Jolla, CA, USA 92093
- 66 **21.** Shu Chien-Gene Lay Department of Bioengineering, University of California, San Diego, La
- 67 Jolla, CA, USA
- 68 Address: 3223 Voigt Dr, La Jolla, CA, USA 92093
- 69 **22.** Wisconsin Alzheimer's Institute, School of Medicine and Public Health, University of
- 70 Wisconsin-Madison, Madison, WI, USA
- 71 Address: 610 Walnut Street, 9th Floor, Madison, WI, USA 53726

72  
73  
74  
75  
76  
77  
78

79 **Abstract**

80 BACKGROUND: The gut microbiome is a potentially modifiable factor in Alzheimer's disease  
81 (AD); however, understanding of its composition and function regarding AD pathology is limited.

82  
83 METHODS: Shallow-shotgun metagenomic data was used to analyze fecal microbiome from  
84 participants enrolled in the Wisconsin Microbiome in Alzheimer's Risk Study, leveraging clinical  
85 data and cerebrospinal fluid (CSF) biomarkers. Differential abundance and ordinary least  
86 squares regression analyses were performed to find differentially abundant gut microbiome  
87 features and their associations with CSF biomarkers of AD and related pathologies.

88  
89 RESULTS: Gut microbiome composition and function differed between people with AD and  
90 cognitively unimpaired individuals. The compositional difference was replicated in an  
91 independent cohort. Differentially abundant gut microbiome features were associated with CSF  
92 biomarkers of AD and related pathologies.

93  
94 DISCUSSION: These findings enhance our understanding of alterations in gut microbial  
95 composition and function in AD, and suggest that gut microbes and their pathways are linked to  
96 AD pathology.

97  
98  
99

100  
101  
102  
103  
104  
105  
106  
107  
108  
109  
110  
111  
112  
113  
114  
115  
116  
117  
118  
119  
120

## 121 **1 BACKGROUND**

122 The human gut microbiome is recognized as an important modifiable factor in health and  
123 disease. It is related to overall gut health by maintaining gut barrier integrity and gut immune  
124 homeostasis via balanced composition and production of microbial metabolites such as short-  
125 chain fatty acids (SCFAs).<sup>1-3</sup> However, in certain disease states, including Alzheimer's disease  
126 (AD), gut microbiome composition and its metabolic changes may alter and exacerbate the  
127 disease.

128 Compositional differences in gut microbiota, including relative abundance and diversity,  
129 have been observed between control and AD groups.<sup>4</sup> Other studies have reported that gut  
130 microbiome composition is altered among people with AD dementia, individuals with mild  
131 cognitive impairment (MCI), or preclinical AD compared with healthy controls.<sup>5-8</sup> To better  
132 determine the relationship between gut microbiome and AD pathology, studies have leveraged  
133 measures of AD biomarkers obtained via cerebrospinal fluid (CSF) analysis,<sup>9</sup> positron emission  
134 tomography (PET),<sup>10</sup> and plasma.<sup>11</sup> Additionally, inflammatory markers have been utilized to find  
135 associations with gut inflammation-driven AD pathology.<sup>12,13</sup>

136 The shift towards functional analysis provides deeper insights into the functional  
137 potential of the microbiome, which is important given that multiple lines of evidence indicate that  
138 gut microbial pathways and associated metabolites influence disease development, as well as  
139 providing the opportunity to identify therapeutic targets.<sup>14-17</sup> A small number of studies have  
140 examined gut microbiome composition and function together with markers of AD pathology in  
141 humans,<sup>8,18-20</sup> but many other studies to date are limited to the composition of gut microbes in a  
142 single cohort. The Alzheimer Gut Microbiome Project (AGMP) initiative continues to leverage gut  
143 microbiome and metabolome to better understand metabolic processes that influence AD  
144 pathology.

145 To identify differences in composition and function as well as relationships between gut  
146 microbiome and AD pathology, this study collected stool samples from participants enrolled in  
147 the Microbiome in Alzheimer's Risk Study (MARS). Differences in microbiome diversity as well  
148 as abundance were compared between AD-related groups (diagnosis, amyloid status, and  
149 *APOE*  $\epsilon 4$  status), and the co-occurrence of the common gut microbiota features was analyzed  
150 among comparison groups. In addition, validation of gut microbiota composition that was  
151 differentially abundant between AD compared to healthy controls was performed in a larger  
152 cohort of participants who are part of the AGMP. Furthermore, determination of microbiome  
153 functional differences was compared between people with AD dementia and cognitively  
154 unimpaired (CU) individuals. Lastly, associations between any differentially abundant gut  
155 microbiome features were examined in relation to CSF biomarkers of AD and related  
156 pathologies to identify the potential microbes and microbial pathways that relate to AD  
157 pathology. We hypothesized that gut microbiome alterations in composition and function would  
158 be present among people with AD dementia compared to CU, as well as associate with AD  
159 pathology.

160

## 161 2 METHODS

### 162 2.1 Participants

163 Participants included in this study were recruited from the Wisconsin Alzheimer's  
164 Disease Research Center (ADRC) Clinical Core and the Wisconsin Registry for Alzheimer's  
165 Prevention (WRAP).<sup>21</sup> The WRAP study enrolled participants between the ages of 40–65 years  
166 at study entry, and the cohort is enriched for parental history of AD dementia. The Wisconsin  
167 ADRC clinical core enrolls participants who span the clinical and biological spectrum of AD,  
168 from those who are CU to individuals with mild cognitive impairment (MCI) and AD dementia.  
169 Participants underwent *APOE* genotyping using competitive allele-specific PCR-based KASP™  
170 genotyping assays (LGC Genomics, Beverly, MA)<sup>22</sup> as well as longitudinal assessments of  
171 cognition and laboratory tests. Biomarkers of AD determined with CSF collection and PET  
172 neuroimaging were collected in a subset of the cohort. Participants underwent fecal sample  
173 collection as part of their participation in MARS, which was used to analyze the gut microbiome.  
174 Participants completed questionnaires including medical history and diet, at the time of fecal  
175 sample collection.

176 Participant diagnosis of AD was determined by a multidisciplinary consensus diagnostic  
177 panel and based on the National Institute on Aging–Alzheimer's Association (NIA-AA)  
178 criteria.<sup>23,24</sup> Participants underwent dynamic [<sup>11</sup>C]Pittsburgh compound B (PiB) PET scans and  
179 lumbar puncture for CSF collection to determine their amyloid status. Amyloid positivity on PET  
180 imaging was achieved by the visual rating (1.19 or greater)<sup>25</sup> from a global PiB distribution  
181 volume ratio (DVR) and determined for CSF via the A $\beta_{42}$ /A $\beta_{40}$  ratio (less than 0.046).<sup>26</sup> The  
182 study procedures were approved by the University of Wisconsin Institutional Review Board, and  
183 all participants provided signed or oral informed consent.

184 An independent cohort of participants who are part of the AGMP and who were recruited  
185 from multiple NIA-funded ADRC across the U.S. ( $n = 448$ , **Table S1**) was included for validation  
186 of differential abundance analysis. AGMP participants from Wisconsin were excluded to ensure  
187 a unique validation sample.  
188

### 189 2.2 Fecal sample collection and metagenomic data sequencing

190 Fecal samples were collected as previously described.<sup>4</sup> Briefly, participants collected  
191 their stool samples at home with provided fecal collection kits. Participants returned their  
192 samples in insulated containers which were chilled with frozen gel packs. Returned samples  
193 were immediately weighed and scored on the Bristol stool scale. Fecal samples were then  
194 subsampled using sterile straws and stored at  $-80^{\circ}\text{C}$  until processing.

195 Fecal samples were processed for DNA extraction as previously described.<sup>27</sup> Briefly,  
196 samples were extracted using the MoBio PowerMag Soil DNA isolation kit with a magnetic bead  
197 plate. Extracted genomic DNA (gDNA) was quantified with Quant-iT PicoGreen double-stranded  
198 DNA (dsDNA) assay kit (Thermo Fisher Scientific Inc.), and underwent a miniaturized KAPA  
199 HyperPlus library preparation using an iTru indexing strategy.<sup>28,29</sup> Library was normalized  
200 pooled based on concentration, PCR cleaned, and then size selected (300-700 bp) on the Sage  
201 Science PippinHT. Libraries were sequenced on an Illumina NovaSeq 6000 as a paired-end

## Gut Microbiome Compositional and Functional Features Associate with Alzheimer's Disease Pathology

202 150-cycle run at the University of California San Diego (UCSD) IGM Genomics Center as part of  
203 AGMP initiative.<sup>30</sup>  
204

### 205 2.3 Metagenomic data processing

206 The metagenomic data processing was performed as previously described.<sup>31</sup> The  
207 sequence data were filtered for all adapters known to fastp (version 0.23.4) in paired-end mode  
208 by explicitly specifying a known adapters file.<sup>32</sup> Fastp also removed sequences shorter than 45  
209 nucleotides with `-l`, a flag to filter the minimum length of each sequence. Each sample was then  
210 filtered against each genome in the human pangenome,<sup>33</sup> as well as both T2T-CHM13v2.0<sup>34</sup>  
211 and GRCh38,<sup>35</sup> using minimap2<sup>36</sup> (version 2.26-r1175) with `"-ax sr"` for short read mode. The  
212 data were first run in paired-end mode, and then run in single-end mode, per genome. Each  
213 successive run was converted from SAM to FASTQ using samtools<sup>37</sup> (version 1.17) with  
214 arguments `-f 12 -F 256 -N` for paired-end data and `-f 4 -F 256` for single-end. The single-end  
215 data are repaired using fastq\_pair<sup>38</sup> (version 1.0) specifying a table size of 50M with `-t`. Compute  
216 support was provided with GNU Parallel<sup>39</sup> (version 20180222). Single-end FASTQ output from  
217 samtools was split into R1 and R2 with a custom Rust program, with rust-bio for parsing<sup>40</sup>  
218 (version 1.4.0). Data were multiplexed with sed and demultiplexed using a custom Python script.  
219 Shotgun sequencing data were then uploaded to and processed through Qiita<sup>41</sup> (Study ID  
220 13663). Sequence adapter and host filtering were executed using qp-fastp-minimap2 version  
221 2022.04. Subsequently, Woltka<sup>42</sup> version 0.1.4 (qp-woltka 2022.09) with the Web of Life 2  
222 database was employed for taxonomic and functional predictions. Genomic coverages were  
223 computed, and features with less than 25% coverage were excluded.<sup>43</sup> To enhance data quality,  
224 a prevalence filter using QIIME 2 v2023.5<sup>44</sup> was applied, eliminating features present in less  
225 than 10% of samples and samples with a sampling depth of less than 500,000 reads to mitigate  
226 the inclusion of erroneous and low-quality reads. The resulting feature table was utilized for  
227 downstream analysis.

228

### 229 2.4 Biomarker measurements

#### 230 2.4.1 CSF biomarkers

231 CSF samples were collected via lumbar puncture in the morning after fasting for 8-12  
232 hours as previously described.<sup>26</sup> CSF biomarkers were measured using the NeuroToolKit  
233 (NTK), a panel of exploratory robust prototype assays (Roche Diagnostics International Ltd,  
234 Rotkreuz, Switzerland). The following biomarkers were quantified on the Cobas<sup>®</sup> e 601 module  
235 (Roche Diagnostics International Ltd, Rotkreuz, Switzerland): A $\beta$ <sub>42</sub>, pTau<sub>181</sub>, tTau, S100 calcium  
236 binding protein B (S100B), and interleukin-6 (IL-6), and the remaining biomarkers were assayed  
237 on the Cobas<sup>®</sup> e 411 analyzer: A $\beta$ <sub>40</sub>, neurofilament light protein (NfL), neurogranin,  $\alpha$ -synuclein,  
238 glial fibrillary acidic protein (GFAP), chitinase-3-like protein 1 (YKL-40), and soluble triggering  
239 receptor expressed on myeloid cells 2 (sTREM2). Each biomarker was measured as markers of  
240 AD and related pathologies which were amyloid pathology (A $\beta$ <sub>42</sub>/A $\beta$ <sub>40</sub>), tau pathophysiology  
241 (pTau<sub>181</sub> and tTau), neurodegeneration (NfL), synaptic dysfunction and injury (neurogranin and  
242  $\alpha$ -synuclein), inflammation (IL-6), and glial activation (S100B, GFAP, YKL-40, and sTREM2).

## Gut Microbiome Compositional and Functional Features Associate with Alzheimer's Disease Pathology

### 243 2.4.2 PiB PET biomarker

244 Dynamic  $^{11}\text{C}$ -PiB scans were acquired using a Siemens ECAT EXACT HR+ tomograph  
245 as previously described.<sup>45</sup> DVRs were estimated with Logan graphical analysis and a threshold  
246 of 1.19 for global DVR was used to determine PiB status which was used along with CSF  
247  $\text{A}\beta_{42}/\text{A}\beta_{40}$  ratio to confirm amyloid status of participants.  
248

### 249 2.5 Statistical analysis

250 Statistical analysis on participant demographics was performed across clinical diagnoses  
251 using the Kruskal-Wallis rank sum test for continuous variables and Pearson's Chi-squared test  
252 for categorical variables. Analysis with multiple comparisons was corrected for multiple tests  
253 employing the Bonferroni correction method. Gut microbiome diversities were calculated using  
254 QIIME 2 tools.<sup>44</sup> Alpha diversity indices were calculated including Shannon,<sup>46</sup> Evenness,<sup>47</sup> and  
255 Faith's phylogenetic diversity (PD).<sup>48</sup> Beta diversity indices were calculated including Bray–  
256 Curtis dissimilarity,<sup>49</sup> and Weighted<sup>50</sup> and Unweighted<sup>51</sup> UniFrac. The Bayesian Inferential  
257 Regression for Differential Microbiome Analysis (BIRDMAn) pipeline was used for microbiome  
258 differential abundance (DA) analysis.<sup>52</sup> Microbiome features (composition and function) were  
259 outcome variables and each AD-related group (clinical diagnosis, amyloid status, and *APOE*  $\epsilon 4$   
260 status) was a predictor adjusting for covariates including age, sex, BMI, Bristol type, medication  
261 status, and age difference between fecal collection and measurements of each predictor  
262 variable. Log ratios of Top and Bottom features of each AD-related group (log[Top  
263 features/Bottom features]) were calculated and analyzed using the Mann–Whitney *U* test to  
264 identify similarities in microbiome features that differ between AD-related groups. Venn  
265 diagrams were created to illustrate any overlapping taxonomies across AD groups in each Top  
266 (more abundant in AD-related groups) and Bottom (less abundant in AD-related groups) group  
267 at each taxonomic level (phylum, family, genus, and species). Log ratios of Top and Bottom  
268 features of each AD group (log[Top features/Bottom features]) were also calculated and  
269 analyzed using the Mann–Whitney *U* test in MARS and validation cohorts to identify similarities  
270 in microbiome features that differ between AD and CU groups in both cohorts. Log ratios of Top  
271 and Bottom functional features (log[Top features/Bottom features]) were calculated and  
272 statistical significance was determined by the Mann–Whitney *U* test between AD and CU  
273 groups. Differentially abundant KEGG Orthology (KO)<sup>53</sup> pathways and their associated species  
274 were determined using BIRDMAn.<sup>52</sup> Robust Aitchison principal component analysis (RPCA)  
275 from Gemelli (version 0.0.10) was used to analyze sparse compositional KO<sup>53</sup> microbiome  
276 pathway features that are separated by sample variations.<sup>54</sup> RPCA results were visualized with  
277 scores plots and biplots. Statistical analysis on RPCA was performed with permutational  
278 multivariate analysis of variance (PERMANOVA)<sup>55</sup> between groups.

279 To explore the relationships between key microbial features and pathways identified via  
280 BIRDMAn and CSF biomarkers of AD and related pathologies, we applied an ordinary least  
281 squares (OLS) linear regression approach. Prior to fitting the linear regression model, CSF  
282 biomarkers were standardized using the StandardScaler (version 0.24.1) from the scikit-learn  
283 library.<sup>56</sup> To address issues with sparse, compositional data, we used the  
284 multiplicative\_replacement function from the scikit-bio (version 0.5.7) `skbio.stats.composition`  
285 module to preprocess the metagenomics data. This function replaces zeros with small positive

286 values, preserving the compositional nature of the data. Subsequently, a centered log ratio  
287 (CLR) transformation was applied to the metagenomics data to account for compositionality.  
288 Finally, ordinary least squares (OLS) linear regression was performed on the microbial features  
289 differentially abundant in AD versus CU, in relation to each CSF biomarker. The results were  
290 visualized using heatmaps.

291 All other statistical analyses were performed using Python libraries SciPy (1.13.0),<sup>57</sup>  
292 scikit-learn (1.4.2),<sup>56</sup> and NumPy (version 1.26.4).<sup>58</sup> All figures were generated using Python  
293 libraries Matplotlib (version 3.6.0)<sup>59</sup> and Seaborn (version 0.11.2).<sup>60</sup>  
294

## 295 **3 RESULTS**

### 296 **3.1 Participant demographics**

297 Participant characteristics are shown by clinical diagnosis in **Table 1**. Participants were  
298 aged between 47-93 years. The mean age differed significantly in dementia-AD vs CU. The  
299 percent ratio of *APOE*  $\epsilon 3/\epsilon 3$  carriers was significantly lower and the percent ratio of *APOE*  $\epsilon 4/\epsilon 4$   
300 carriers was higher in dementia-AD compared to CU. Amyloid positivity was higher in the AD  
301 dementia group.  
302

### 303 **3.2 Diversity results in gut microbiota composition**

304 Alpha diversity indices (Shannon, Evenness, and Faith's PD) were presented on the y-  
305 axis and all AD group categories were presented on the x-axis (**Figure 1A-I**). The only  
306 comparison with significant alpha diversity differences was the *APOE*  $\epsilon 4$  comparison (**Figure**  
307 **1G and H**). All alpha diversity indices showed significant differences or a trend toward  
308 differences between *APOE*  $\epsilon 4+$  and *APOE*  $\epsilon 4-$  groups. Individuals who were *APOE*  $\epsilon 4-$  had  
309 significantly higher alpha diversity than *APOE*  $\epsilon 4+$ .

310 Beta diversity indices (Bray-Curtis dissimilarity, and Weighted and Unweighted UniFrac)  
311 were visualized with principal coordinates analysis (PCoA) plots for each AD group (**Figure 1J-**  
312 **R**). Significant differences between groups based on clinical diagnosis (diagnosis) were  
313 observed with each metric (**Figure 1J-L**). Differences in beta diversity between amyloid-positive  
314 and amyloid-negative individuals were detected only with the Bray-Curtis dissimilarity index  
315 (**Figure 1M-O**). Individuals positive and negative for *APOE*  $\epsilon 4$  demonstrated differences with  
316 both the Bray-Curtis and Weighted UniFrac metrics, but not with Unweighted UniFrac (**Figure**  
317 **1P-R**), suggesting that the relative abundance of major taxa rather than community membership  
318 is important in driving these differences.  
319

### 320 **3.3 Gut microbiota composition in clinical diagnosis, amyloid status, and *APOE* $\epsilon 4$** 321 **status groups**

322 A DA analysis on gut microbiota composition was performed based on clinical diagnosis,  
323 amyloid status, and *APOE*  $\epsilon 4$  status groups using BIRDMAN and visualized as forest plots  
324 (**Figure 2**). Gut microbiota taxonomic features that showed the most differences by the effect



## Gut Microbiome Compositional and Functional Features Associate with Alzheimer's Disease Pathology

325 size (log ratio) in each comparison group were displayed up to 20 features in each Top (more  
326 abundant) and Bottom (less abundant) group for taxonomic levels including phylum, family,  
327 genus, and species. DA analysis between AD and CU in clinical diagnosis showed distinct gut  
328 microbiota composition at each taxonomic level (**Figure 2A, D, G, and J**). At the phylum level,  
329 the abundance of phylum Firmicutes\_A was lower in AD compared to CU (Bottom), and the  
330 abundance of phyla Bacteroidota, Patescibacteria, and Fusobacteriota was higher in AD  
331 compared to CU (Top) (**Figure 2A**). At the family level, families such as *Clostridiaceae*,  
332 *Turicibacteraceae*, *Pasteurellaceae*, *Dialisteraceae*, *Enterococcaceae*, and *Ruminococcaceae*  
333 were in the Bottom group and *Fusobacteriaceae*, *Nanogingivalaceae*, *Gemellaceae*, and  
334 *Bacteroidaceae* were in the Top group (**Figure 2D**). At the genus level, genera including  
335 *Clostridium\_P*, *Ruminococcus*, and *Cryptobacteroides* were in the Bottom group and  
336 *Fusobacterium\_A*, *Fusobacterium*, *Nanogingivalis*, and *Gemella* were in the Top group (**Figure**  
337 **2G**). At the species level, species included in the Bottom group were *Cryptobacteroides* spp.,  
338 *Clostridium\_P perfringens*, *Turicibacter sanguinis*, *Prevotella hominis*, and *Prevotella copri*, and  
339 in the Top group were *Fusobacterium\_A mortiferum*, *Fusobacterium nucleatum*, *Fusobacterium*  
340 *animalis*, *Nanogingivalis gingivitus*, *Collinsella stercoris*, and *Collinsella tanakaei* (**Figure 2J**).

341 DA analysis between A+ and A- in amyloid status showed distinct gut microbiota  
342 composition at each taxonomic level (**Figure 2B, E, H, and K**). At the phylum level, the  
343 abundance of phylum Firmicutes\_C was lower in A+ compared to A- (Bottom), and the  
344 abundance of phyla Thermoplasmatota and Campylobacterota was higher in A+ compared to  
345 A- (Top) (**Figure 2B**). At the family level, families such as *Neisseriaceae*, *Anaeroplasmataceae*,  
346 *Turicibacteraceae*, and *Ruminococcaceae* were in the Bottom group and *Nanogingivalaceae*,  
347 *Campylobacteraceae*, and *Coriobacteriaceae* were in the Top group (**Figure 2E**). At the genus  
348 level, genera including *Prevotella*, *Eubacterium\_R*, and *Lactococcus* were in the Bottom group  
349 and *Fusobacterium*, *Nanogingivalis*, and *Acidaminococcus* were in the Top group (**Figure 2H**).  
350 At the species level, species included in the Bottom group were *Dialister hominis*, *Prevotella*  
351 *copri*, and *Prevotella hominis*, and in the Top group were *Nanogingivalis gingivitus*, *Collinsella*  
352 *tanakaei*, and *Fusobacterium animalis* (**Figure 2K**).

353 DA analysis between APOE  $\epsilon 4+$  and APOE  $\epsilon 4-$  in APOE  $\epsilon 4$  status analyses showed  
354 distinct gut microbiota composition at each taxonomic level (**Figure 2C, F, I, and L**). At the  
355 phylum level, the abundance of phyla Firmicutes\_A, Firmicutes\_C, Spirochaetota, and  
356 Synergistota was lower in APOE  $\epsilon 4+$  compared to APOE  $\epsilon 4-$  (Bottom), and the abundance of  
357 phylum Bacteroidota was higher in APOE  $\epsilon 4+$  compared to APOE  $\epsilon 4-$  (Top) (**Figure 2C**). At the  
358 family level, families such as *Selenomonadaceae*, *Neisseriaceae*, *Pasteurellaceae*,  
359 *Turicibacteraceae*, and *Clostridiaceae* were in the Bottom group and *Lactobacillaceae*,  
360 *Eubacteriaceae*, and *Bacteroidaceae* were in the Top group (**Figure 2F**). At the genus level,  
361 genera including *Ruminococcus* and *Clostridium\_P* were in the Bottom group and *Enterobacter*,  
362 *Hafnia*, and *Lactobacillus* were in the Top group (**Figure 2I**). At the species level, species  
363 included in the Bottom group were *Prevotella hominis*, *Dialister* spp., and *Ruminococcus* spp.,  
364 and in the Top group were *Enterobacter hormaechei\_A*, *Hafnia proteus*, *Collinsella stercoris*,  
365 *Enterobacter cloacae*, and *Collinsella tanakaei* (**Figure 2L**).

366 Log ratios of microbiome counts were calculated between the sum of the Top and  
367 Bottom groups from DA analysis to test the overall significant differences of microbiome  
368 features between AD conditions (log[sum of Top features/sum of Bottom features]) (**Figure 3**).

## Gut Microbiome Compositional and Functional Features Associate with Alzheimer's Disease Pathology

369 Overall, there were significant differences in each AD-related group (diagnosis, amyloid, and  
370 *APOE*  $\epsilon 4$ ) (**Figure 3A, E, and I**). Features that significantly differed between AD and CU also  
371 differed between *APOE*  $\epsilon 4+$  and *APOE*  $\epsilon 4-$  (**Figure 3A and C**). Features that significantly  
372 differed between A+ and A- also differed between AD and CU (**Figure 3D and E**). Features that  
373 significantly differed between *APOE*  $\epsilon 4+$  and *APOE*  $\epsilon 4-$  also differed between AD and CU  
374 (**Figure 3G and I**).  
375

### 376 3.4 Common gut microbiota features in clinical diagnosis, amyloid status, and *APOE* $\epsilon 4$ 377 status groups

378 Venn diagrams were used to find common microbiome features across different AD  
379 conditions for each Bottom and Top group at each taxonomic rank (**Table S2**). At the phylum  
380 level, phyla Bacteroidota co-occurred between diagnosis and *APOE*  $\epsilon 4$  in the Top group (**Figure**  
381 **4A**). Firmicutes\_A co-occurred between diagnosis and *APOE*  $\epsilon 4$ , and Firmicutes\_C co-occurred  
382 between amyloid and *APOE*  $\epsilon 4$  in the Bottom group (**Figure 4B**). In the Top group at the family  
383 level, the family *Lactobacillaceae* co-occurred across all conditions, families *Bacteroidaceae*  
384 and *Coprobacteraceae* between diagnosis and *APOE*  $\epsilon 4$ , and families *Nanogingivalaceae* and  
385 *Aerococcaceae* co-occurred between diagnosis and amyloid (**Figure 4C**). In the Bottom group,  
386 *UBA1829* and *Turicibacteraceae* co-occurred across all conditions (diagnosis, amyloid, and  
387 *APOE*  $\epsilon 4$ ), families *CAG-508*, *CAG-74*, *Oscillospiraceae*, *Clostridiaceae*, *Pasteurellaceae*, and  
388 *CAG-138* co-occurred between diagnosis and *APOE*  $\epsilon 4$ , families *Ruminococcaceae*,  
389 *Anaeroplasmataceae*, and *CAG-312* co-occurred between diagnosis and amyloid, and family  
390 *Neisseriaceae* co-occurred between amyloid and *APOE*  $\epsilon 4$  (**Figure 4D**). Multiple genera and  
391 species co-occurred across all conditions (**Figure 4E-H**). In the Top group, the genus  
392 *Veillonella\_A* co-occurred across all conditions, and the following numbers of genera co-  
393 occurred between each intersection, i.e., diagnosis and *APOE*  $\epsilon 4$ : 7, diagnosis and amyloid: 6,  
394 and amyloid and *APOE*  $\epsilon 4$ : 4 (**Figure 4E, Table S2**). In the Bottom group, 13 genera co-  
395 occurred across all conditions including *Prevotella* and *Turicibacter*, and the following numbers  
396 of genera co-occurred between each intersection, i.e., diagnosis and *APOE*  $\epsilon 4$ : 30, diagnosis  
397 and amyloid: 9, and amyloid and *APOE*  $\epsilon 4$ : 8 (**Figure 4F, Table S2**). In the Top group at the  
398 species level, 12 species including *Bacteroides ovatus*, *Collinsella tanakaei*, *Prevotella corporis*,  
399 and more co-occurred across all conditions, and the following numbers of species co-occurred  
400 between each intersection, i.e., diagnosis and *APOE*  $\epsilon 4$ : 18, diagnosis and amyloid: 10, and  
401 amyloid and *APOE*  $\epsilon 4$ : 7 (**Figure 4G, Table S2**). In the Bottom group, 27 species including  
402 *Ruminococcus\_C callidus*, *Dialister succinatiphilus*, *Prevotella copri*, and more co-occurred  
403 across all conditions, and the following numbers of species co-occurred between each  
404 intersection, i.e., diagnosis and *APOE*  $\epsilon 4$ : 42, diagnosis and amyloid: 13, and amyloid and  
405 *APOE*  $\epsilon 4$ : 16 (**Figure 4H, Table S2**).  
406

### 407 3.5 Validation of shallow-shotgun data with the ADRC dataset on gut microbiota 408 composition

409 To validate the features linked with dementia-AD (AD) compared to healthy controls  
410 (CU), we tested the log-transformed ratios of features more and less abundant in AD in the  
411 MARS cohort against a larger cohort of participants who are part of the AGMP and who were  
412 recruited from multiple NIA-funded ADRC across the U.S. (n = 448; **Figure 5**). AGMP  
413 participants from Wisconsin were excluded to ensure a unique validation sample. The features  
414 that were differentially abundant in the MARS cohort (Kruskal-Wallis: 31.81, *P* value: < .001;  
415 **Figure 5A**) were also found to be differentially abundant in the larger validation cohort (Kruskal-  
416 Wallis: 5.59, *P* value: .02; **Figure 5B**).  
417

### 418 3.6 Gut microbiome functional pathways in a clinical diagnosis group

419 The DA analysis of gut microbiome functional pathways, stratified by species within each  
420 pathway, identified 116 distinct pathways that differ between individuals with AD and CU  
421 individuals (**Table S3**). Among 116 distinct pathways, we focused our analysis on pathways that  
422 only showed abundance in either the Top (more abundant in AD) or the Bottom (less abundant  
423 in AD) group. Among pathway features only with either the Top (15 pathways) or the Bottom (6  
424 pathways) group, the log ratios of Top/Bottom features were shown to be significantly different  
425 between AD and CU (**Figure 6A**). Furthermore, gut microbiome taxonomic features that were  
426 associated with pathway features (36 features) only with either the Top or Bottom group were  
427 visualized with each pathway category (**Figure 6B**). For example, a pathway, naphthalene  
428 degradation, was one of the Bottom pathways, and microbes associated with this pathway were  
429 species *Turicibacter sanguinis*, *Bifidobacterium angulatum*, and *Lactococcus lactis* (**Figure 6B**).  
430 Another example in the Top pathway is benzoate degradation which is associated with microbes  
431 including *Anaerostipes caccae*, *Bacteroides finegoldii*, and *Bacteroides thetaiotaomicron*  
432 (**Figure 6B**).

433 RPCA on microbiome pathway features (36 features from DA analysis) visualized with a  
434 biplot indicated a significant separation between the clinical diagnosis group (AD and CU, *P*  
435 value = .004) (**Figure 6C**). Microbial features that belonged to the Top group indicated by the  
436 red vector directed towards many AD subjects indicated by the orange dots. Microbial features  
437 that belonged to the Bottom group indicated by the green vector directed towards many CU  
438 subjects indicated by the blue dots. For instance, multiple pathways from species *Bacteroides*  
439 *thetaitaomicron* pointed towards the AD group suggesting a potentially stronger association  
440 between the Top features and AD group (**Figure 6C**). On the other hand, pathways from  
441 species *Turicibacter sanguinis*, *Bifidobacterium angulatum*, and *Lactococcus lactis*, which  
442 belonged to the Bottom group, pointed towards the CU group or showed different directions  
443 compared to the Top features suggesting a potentially weaker association between the Bottom  
444 features and AD group (**Figure 6C**).  
445

446 3.7 Associations between gut microbiome compositional and functional features in  
447 clinical diagnosis group and CSF biomarkers of AD and related pathologies

448 Associations between gut microbiome features (composition and function) and CSF  
449 biomarkers of AD and related pathologies were performed as described in the 'Statistical  
450 analysis' section of the 'Methods' (**Figure 7**).

451 Overall, in the association between gut microbiome compositional features and CSF  
452 biomarkers of AD and related pathologies, most species that were more abundant in AD  
453 compared to CU individuals were positively correlated with CSF biomarkers. Conversely,  
454 species that were less abundant in AD were generally negatively associated with CSF  
455 biomarkers. CSF biomarkers for AD and related pathologies included in the analysis were  
456 amyloid pathology ( $A\beta_{42}/A\beta_{40}$ ), tau pathophysiology (pTau<sub>181</sub> and tTau), neurodegeneration  
457 (NfL), synaptic dysfunction and injury (neurogranin and  $\alpha$ -synuclein), inflammation (IL-6), and  
458 glial activation (S100B, GFAP, YKL-40, and sTREM2) (**Figure 7A**).

459 Species that were more abundant in AD were generally positively associated with CSF  
460 biomarkers. For example, *Nanogingivalis gingivitus*, more abundant in AD, was positively  
461 associated with S100B, neurogranin, pTau<sub>181</sub>, and tTau. *Fusobacterium\_A mortiferum* was  
462 positively correlated with neurogranin, pTau<sub>181</sub>, tTau, and  $\alpha$ -synuclein, and negatively  
463 associated with CSF amyloid ( $A\beta_{42}/A\beta_{40}$ ). *Fusobacterium animalis* was positively associated  
464 with neurogranin, pTau<sub>181</sub>, tTau, and  $\alpha$ -synuclein. *CAG-1031 sp000431215*, a species within the  
465 Bacteroidetes phylum, was positively correlated with NfL, YKL-40, pTau<sub>181</sub>, tTau, and  $\alpha$ -  
466 synuclein. *Berrvella sp001552935* was positively associated with YKL-40, sTREM2, tTau, and  
467  $\alpha$ -synuclein. Additionally, *Lactobacillus acidophilus* and *Bifidobacterium vaginale* were positively  
468 associated with S100B, *CAG-977 sp000434295* was associated with pTau<sub>181</sub> and tTau,  
469 *Fusobacterium nucleatum* was associated with tTau, *Limosilactobacillus vaginalis* and  
470 *Collinsella tanakaei* were associated with pTau<sub>181</sub>, and *CAG-177 sp000431775* was associated  
471 with IL-6.

472 Species that were less abundant in AD were generally negatively associated with CSF  
473 biomarkers. Species *SFMI01 sp004556155*, *Turicibacter sanguinis*, and *Dialister hominis*, all  
474 within the Firmicutes phylum, were negatively associated with neurogranin, pTau<sub>181</sub>, tTau, and  
475  $\alpha$ -synuclein. *UBA5809 sp002417965*, another Firmicutes species, was also negatively  
476 associated with neurogranin, pTau<sub>181</sub>, tTau, and  $\alpha$ -synuclein, as well as sTREM2. *UBA11524*  
477 *sp000437595*, another Firmicutes species, was negatively associated with NfL.  
478 *Cryptobacteroides sp900544195* and *Cryptobacteroides sp000432515*, both species under  
479 phylum Bacteroidetes, were negatively associated with S100B.

480 In the association between gut microbiome functional features and CSF biomarkers of  
481 AD and related pathologies, multiple microbial pathways more abundant in AD compared to CU  
482 showed a tendency to positively correlate with the CSF biomarkers, whereas pathways less  
483 abundant in AD compared to CU showed a tendency to have negative associations with the  
484 CSF biomarkers (**Figure 7B**). It should be noted that a lower  $A\beta_{42}/A\beta_{40}$  ratio is associated with a  
485 higher risk of having AD pathology whereas higher levels of the rest of the CSF biomarkers are  
486 associated with a higher risk of having AD pathology. The same categories of CSF biomarkers  
487 for AD and related pathologies were included in the analysis including  $A\beta_{42}/A\beta_{40}$ , pTau<sub>181</sub>, tTau,  
488 IL-6, NfL, neurogranin,  $\alpha$ -synuclein, S100B, GFAP, YKL-40, and sTREM2.

## Gut Microbiome Compositional and Functional Features Associate with Alzheimer's Disease Pathology

489 Microbial functional features in the Top group showed overall positive associations with  
490 CSF biomarkers with the exception of  $A\beta_{42}/A\beta_{40}$ . Multiple *Bacteroides* spp. and their related  
491 pathways were positively associated with several CSF biomarkers including NfL, neurogranin,  
492  $\alpha$ -synuclein, pTau<sub>181</sub>, and tTau. *Bacteroides thetaiotaomicron* and its associated pathways  
493 including benzoate degradation, ubiquinone and other terpenoid-quinone biosynthesis,  
494 biosynthesis of various plant secondary metabolites, inositol phosphate metabolism, lipoic acid  
495 metabolism, biosynthesis of various antibiotics, beta-alanine metabolism, carbapenem  
496 biosynthesis, neomycin, kanamycin and gentamicin biosynthesis, polyketide sugar unit  
497 biosynthesis, ascorbate and aldarate metabolism, and taurine and hypotaurine metabolism had  
498 generally positive relationship with CSF biomarkers including NfL, YKL-40, neurogranin,  $\alpha$ -  
499 synuclein, pTau<sub>181</sub>, and tTau, and negative relationship with IL-6. *Collinsella stercoris* and  
500 polyketide sugar unit biosynthesis pathway showed positive correlation with GFAP and  
501 sTREM2, and negative correlation with  $A\beta_{42}/A\beta_{40}$ . *Collinsella stercoris* and O-antigen repeat unit  
502 biosynthesis pathway showed negative correlation with  $A\beta_{42}/A\beta_{40}$ .

503 Microbial functional features in the Bottom group showed overall negative associations  
504 with CSF biomarkers for AD and related pathologies. Two pathways, ether lipid metabolism and  
505 alpha-linolenic acid metabolism, related to *Parabacteroides merdae*, a species more abundant  
506 in CU group were associated with lower CSF  $A\beta_{42}/A\beta_{40}$ . It implies that higher abundance of  
507 these pathways of *Parabacteroides merdae* in CU individuals is associated with more brain  
508 amyloid. Moreover, bacterial chemotaxis pathway from *Coprococcus eutactus* was negatively  
509 associated with NfL and YKL-40, and naphthalene degradation pathway from *Turicibacter*  
510 *sanguinis* was negatively associated with  $\alpha$ -synuclein, pTau<sub>181</sub>, and tTau.

511

## 512 4 DISCUSSION

513 In this study, we compared gut microbiome composition and function between several  
514 AD-relevant groups, including those with a clinical diagnosis, differential amyloid status, and  
515 *APOE*  $\epsilon 4$  carrier status. The objective was to determine the association of gut microbiome  
516 features that are differentially abundant in AD dementia and determine association with CSF  
517 biomarkers of AD and related pathological features, to potentially identify gut microbial features  
518 associated with AD.

519 Alpha and beta diversity analysis was performed between groups of each clinical  
520 diagnosis, amyloid status, and *APOE*  $\epsilon 4$  status groups. Prior studies have found that alpha and  
521 beta diversities do not differ between AD vs CU<sup>61,62</sup> and A+ vs A-<sup>63</sup> while other studies showed  
522 significant differences in alpha and beta diversity indices in humans<sup>4,7</sup> and mice.<sup>64-66</sup>

523 The DA analysis in gut microbiome composition at each taxonomic level using BIRDMAN  
524 was performed in AD-related groups. Similar results were reported in other studies<sup>6,67</sup> while  
525 opposite findings were also found, where fewer Bacteroidetes and more Firmicutes were  
526 reported in MCI compared to healthy controls and fewer genera *Bacteroides* and *Alistipes* and  
527 more genus *Bifidobacterium* were found in AD compared to health controls.<sup>68,69</sup> A meta-analysis  
528 of gut microbiome compositional differences in AD across studies between 2000 to 2021  
529 demonstrated similar outcomes measured by overall pooled effect size at each taxonomic  
530 level.<sup>7</sup>

## Gut Microbiome Compositional and Functional Features Associate with Alzheimer's Disease Pathology

531 Discrepancies between studies may be due to differences in sample size, population  
532 variation, disease heterogeneity, sequencing method, and confounding factors.<sup>70</sup> Our study  
533 addresses these discrepancies through robust methodologies. Firstly, we utilized shotgun  
534 metagenomic sequencing, which provides more comprehensive taxonomic and functional  
535 profiling of microbial communities compared to 16S rRNA sequencing.<sup>71</sup> Additionally, we  
536 employed advanced statistical methodologies that have been shown to be replicable across  
537 multiple cohorts.<sup>52</sup> Lastly, we validated our findings with a larger cohort from the AGMP, which  
538 significantly enhances the reliability and generalizability of our result. Our validation of the DA  
539 analysis in a larger cohort largely recapitulates what we found in the smaller sample, confirming  
540 that alterations in gut microbiome composition are present in AD dementia.

541 To further determine co-occurring gut microbes among clinical diagnosis, amyloid status,  
542 and *APOE*  $\epsilon 4$  status groups, a co-occurrence analysis was performed on differentially abundant  
543 microbes in each group. Investigating co-occurring taxonomic features may be useful in the  
544 examination of gut microbiota that could potentially coexist and contribute to AD pathology  
545 related to amyloid pathology or *APOE*  $\epsilon 4$  pathology which are phenotypic and genotypic  
546 pathological signatures of AD. Studies have shown gut microbiota differences between CU+  
547 ( $A\beta$ -positive) and CU- ( $A\beta$ -negative).<sup>8,11,72</sup> One of the studies showed that Phylum  
548 Bacteroidetes, class Bacteroidia, and order Bacteroidales were enriched in CN+ and phylum  
549 Firmicutes, class Clostridia, order Clostridiales, families *Lachnospiraceae* and  
550 *Ruminococcaceae*, and genera *Faecalibacterium* and *Bilophila* were enriched in CN-.<sup>11</sup> Higher  
551 abundance of genera *Faecalibacterium* and *Bilophila* was negatively correlated with the global  
552 brain  $A\beta$  burden.<sup>11</sup> Another study explored gut microbiome taxa which are pro-inflammatory with  
553 blood inflammation markers.<sup>73</sup> Genus *Escherichia/Shigella* was significantly more abundant in  
554 A+ compared with A- individuals. Genus *Escherichia/Shigella* was correlated positively with  
555 peripheral inflammatory cytokines in individuals with cognitive impairment and brain  
556 amyloidosis.<sup>73</sup>

557 Taken together, results from our study and other studies suggest that diverse and  
558 distinct gut microbiota taxonomic composition is altered in AD dementia, among individuals with  
559 preclinical AD, and individuals with genetic risk for AD. However, studies are limited to  
560 taxonomic and compositional associations and the determination of microbial functions in AD  
561 pathogenesis is needed to better understand the role of specific gut microbes and their  
562 functions in the progression of AD.

563 This study further examined the functional pathways of gut microbiome in a clinical  
564 diagnosis group between AD and CU. Gut microbiome pathways and associated species that  
565 are differentially abundant between AD and CU were determined. We found 116 distinct  
566 pathways between AD and CU. Among 116 KO pathway features, 21 pathways had  
567 associations either with AD (Top) or CU (Bottom) group. The log ratios of these Top/Bottom  
568 microbial pathway features between AD and CU were significantly different. Interestingly,  
569 species that were associated with these microbial pathways were mostly *Bacteroides* spp. (*B.*  
570 *finnegoldii*, *B. thetaotaomicron*, and *B. ovatus*) under phylum Bacteroidota in the Top group.  
571 Multiple studies have reported the association between *Bacteroides* and AD.<sup>4,74,75</sup> Administration  
572 of *Bacteroides fragilis* to AD mice increased  $A\beta$  plaques and inhibition of microglial clearance of  
573  $A\beta$  was observed after introduction to *B. fragilis*.<sup>76</sup> Another study showed the role of *B. fragilis* in

## Gut Microbiome Compositional and Functional Features Associate with Alzheimer's Disease Pathology

574 AD pathology in mice.<sup>77</sup> Studies have suggested that genus *Bacteroides* to be dominant in older  
575 adults compared with healthy and younger controls.<sup>78,79</sup> However, contrasting findings have  
576 been reported related to *Bacteroides*<sup>8,80</sup> and further strain-specific studies are needed to  
577 understand the role of *Bacteroides* in AD pathology.

578 Additionally, RPCA showed a distinct significant separation between AD and CU groups.  
579 RPCA is known to handle sparse and high-dimensional datasets and is sensitive to datasets  
580 with outliers.<sup>54</sup> Microbiome datasets are often sparse and zero-inflated, thus we employed  
581 RPCA to identify microbiome features that could explain the separation between groups.  
582 Consistent with the DA analysis, RPCA showed microbial pathways that are more abundant in  
583 AD (Top) were more associated with AD dementia, whereas microbial pathways less abundant  
584 in AD (Bottom) were less associated with AD dementia.

585 To determine whether distinct microbial features in AD and CU correlate with CSF  
586 biomarkers of AD and related pathologies, the relationship between CSF biomarkers and each  
587 compositional and functional gut microbiome feature was explored using the OLS regression  
588 model.

589 Key microbiome species, particularly *Fusobacterium nucleatum*, *Fusobacterium*  
590 *animalis*, and *Nanogingivalis gingivitus*, identified as commonly more abundant between AD  
591 and A+, were associated with more intense tau pathophysiology (pTau<sub>181</sub> and tTau) and/or  
592 synaptic dysfunction and injury (neurogranin and  $\alpha$ -synuclein). Interestingly, the species  
593 *Fusobacterium nucleatum* is an oral bacteria often associated with cavity and periodontal  
594 diseases as well as colorectal cancer.<sup>81,82</sup> *Fusobacterium nucleatum* produces  
595 lipopolysaccharides (LPS) that induce microglial activation with elevated expression of  
596 proinflammatory cytokines.<sup>83</sup> In prior studies using the 5XFAD mouse model, the mRNA  
597 expression levels of the same proinflammatory cytokines as well as numbers of microglia in the  
598 mice brain were increased after *Fusobacterium nucleatum* infection.<sup>83</sup> Moreover, enhanced A $\beta$   
599 accumulation, tau protein phosphorylation, and memory impairment were observed in 5XFAD  
600 mice compared to controls.<sup>83</sup> The oral infection of *Fusobacterium nucleatum* in AD-like  
601 periodontitis rats exhibited increased accumulation of A $\beta$  and pTau<sub>181</sub> expression in the brain.<sup>84</sup>  
602 Although these results propose valuable mechanistic backgrounds for *Fusobacterium*  
603 *nucleatum* and AD, further investigation in humans is needed.

604 The species *Dialister hominis*, a microbe that co-occurred between CU and A- displayed  
605 a negative correlation with AD pathology (pTau<sub>181</sub>), neuronal damage (tTau), and synaptic  
606 dysfunction and injury (neurogranin and  $\alpha$ -synuclein). These findings are similar to previous  
607 works which identified genus *Dialister* (less in AD) to be more abundant in CU individuals.<sup>85,86</sup>  
608 Another species *Turicibacter sanguinis* which was a microbe that co-occurred between CU and  
609 *APOE  $\epsilon$ 4-* showed a negative correlation with pTau<sub>181</sub>, tTau, neurogranin, and  $\alpha$ -synuclein. In  
610 animal models for AD, *Turicibacter sanguinis* is reported to be less abundant in AD compared to  
611 controls.<sup>87,88</sup> In humans, *Turicibacter* was observed to be less abundant in individuals with AD.<sup>4</sup>  
612 However, studies on the role of species specific to *Dialister hominis* and *Turicibacter sanguinis*  
613 in AD pathology are scarce.

614 This result indicates that microbiota compositional features in CU are related to lower  
615 levels of AD pathology whereas microbiota features in AD are related to higher levels of AD  
616 pathology, suggesting overall microbiota composition in people with AD may be vulnerable to

617 development or progression of AD compared to CU individuals. While these results support a  
618 relationship between gut microbiome composition and AD pathology, further investigation into  
619 these mechanisms is required to find a causal relationship.

620 Multiple *Bacteroides* spp. and their related functional pathways more abundant in AD  
621 were associated with greater AD pathology represented in CSF biomarkers of AD and related  
622 pathologies. Biomarkers including neurodegeneration (NfL), synaptic dysfunction and injury  
623 (neurogranin and  $\alpha$ -synuclein), and tau pathophysiology (pTau<sub>181</sub> and tTau) showed a positive  
624 relationship with *Bacteroides thetaiotaomicron* and their functions. Studies have linked the  
625 abundance of *Bacteroides thetaiotaomicron* with AD. The abundance of *B. thetaiotaomicron*  
626 was significantly higher in AD mice and was related to poorer spatial learning.<sup>89</sup> Increased  
627 abundance of *B. thetaiotaomicron* was reported in AD participants.<sup>90,91</sup> However, in a non-AD  
628 model, *B. thetaiotaomicron* was suggested to regulate enteric neuronal cell populations and  
629 neurogenic function.

630 Although evidence related to these microbial functions is limited, these results suggest  
631 that alterations in gut microbiome composition and function are related to AD pathological  
632 markers measured in CSF.

633 The main limitation of our study is the small number of cognitively impaired participants  
634 relative to CU participants. The sample size decreased after matching clinical measurements,  
635 gut microbiome data, and presence of CSF biomarkers. The resulting low statistical power may  
636 have led to losing significance after multiple test corrections for association analyses between  
637 gut microbiome features and CSF biomarkers. A similar challenge is the inclusion of cognitively  
638 impaired individuals in both the A+ and *APOE*  $\epsilon 4$  groups. Excluding these individuals reduced  
639 the sample sizes, resulting in low statistical power. Future studies should aim to collect sufficient  
640 samples to separate these groups, allowing for a clearer distinction between disease effects and  
641 symptom effects. Moreover, due to the cross-sectional approach, it is difficult to capture the  
642 longitudinal changes over time considering the progression of AD for each individual. We  
643 included the ADRC validation cohort to account for differences in gut microbiome composition  
644 across diverse populations, however, due to the limitation of the availability of biomarkers  
645 matched with fecal samples, we were not able to test associations with CSF biomarkers in the  
646 validation cohort. Additionally, the results are correlational, and further mechanistic studies are  
647 needed to find causal relationships between gut microbiome features and biomarkers for AD  
648 pathology. Finally, other environmental factors (exposome) which may impact the gut  
649 microbiome and which contribute to AD risk require additional study in the future.

650

## 651 **5 CONCLUSIONS**

652 This study suggests that gut microbiome composition and function differ between people with  
653 AD dementia and CU individuals. Beta diversity indices differed among AD-related groups:  
654 diagnosis (AD vs CU), amyloid (A+ vs A-), and *APOE*  $\epsilon 4$  (*APOE*  $\epsilon 4+$  vs *APOE*  $\epsilon 4-$ ) groups,  
655 indicating that the gut microbiome diversity varies between each group. Multiple gut microbes at  
656 each taxonomic level including phylum, family, genus, and species were differentially abundant  
657 across AD groups. Co-occurring gut microbes across AD-related groups were determined,



## Gut Microbiome Compositional and Functional Features Associate with Alzheimer's Disease Pathology

658 many of which showed associations with CSF biomarkers for AD and related pathologies.  
659 Microbial functional pathways were differentially abundant between AD and CU, which were  
660 correlated with AD pathology markers measured in CSF. These findings identify specific targets  
661 for stratifying key gut microbes and microbial pathways that may be related to AD pathology.  
662 Further investigation on metabolomic changes as well as exposome and host genome that may  
663 be mediating the interconnectome between the gut microbiome and AD pathology is needed.

664  
665  
666  
667  
668  
669  
670  
671  
672  
673  
674  
675  
676  
677  
678  
679  
680  
681  
682  
683  
684  
685  
686  
687  
688  
689  
690  
691  
692  
693  
694  
695  
696  
697  
698  
699

## 700 References

- 701 1. Sonnenburg JL, Bäckhed F. Diet–microbiota interactions as moderators of human  
702 metabolism. *Nature*. 2016;535(7610):56-64. doi:10.1038/nature18846
- 703 2. Desai MS, Seekatz AM, Koropatkin NM, et al. A Dietary Fiber-Deprived Gut Microbiota  
704 Degrades the Colonic Mucus Barrier and Enhances Pathogen Susceptibility. *Cell*.  
705 2016;167(5):1339-1353.e21. doi:10.1016/j.cell.2016.10.043
- 706 3. Lee WJ, Hase K. Gut microbiota–generated metabolites in animal health and disease. *Nat*  
707 *Chem Biol*. 2014;10(6):416-424. doi:10.1038/nchembio.1535
- 708 4. Vogt NM, Kerby RL, Dill-McFarland KA, et al. Gut microbiome alterations in Alzheimer's  
709 disease. *Sci Rep*. 2017;7:13537. doi:10.1038/s41598-017-13601-y
- 710 5. Zhuang ZQ, Shen LL, Li WW, et al. Gut Microbiota is Altered in Patients with Alzheimer's  
711 Disease. *Journal of Alzheimer's Disease*. 2018;63(4):1337-1346. doi:10.3233/JAD-180176
- 712 6. Liu P, Wu L, Peng G, et al. Altered microbiomes distinguish Alzheimer's disease from  
713 amnesic mild cognitive impairment and health in a Chinese cohort. *Brain Behav Immun*.  
714 2019;80:633-643. doi:10.1016/j.bbi.2019.05.008
- 715 7. Hung CC, Chang CC, Huang CW, Nouchi R, Cheng CH. Gut microbiota in patients with  
716 Alzheimer's disease spectrum: a systematic review and meta-analysis. *Aging (Albany NY)*.  
717 2022;14(1):477-496. doi:10.18632/aging.203826
- 718 8. Ferreiro AL, Choi J, Ryou J, et al. Gut microbiome composition may be an indicator of  
719 preclinical Alzheimer's disease. *Science Translational Medicine*. 2023;15(700):eabo2984.  
720 doi:10.1126/scitranslmed.abo2984
- 721 9. Vogt NM, Romano KA, Darst BF, et al. The gut microbiota-derived metabolite  
722 trimethylamine N-oxide is elevated in Alzheimer's disease. *Alzheimer's Research &*  
723 *Therapy*. 2018;10(1):124. doi:10.1186/s13195-018-0451-2
- 724 10. Nabizadeh F, Valizadeh P, Fallahi MS, Alzheimer's disease Neuroimaging Initiative. Bile  
725 acid profile associated with CSF and PET biomarkers in Alzheimer's disease. *Aging Clin*  
726 *Exp Res*. 2024;36(1):62. doi:10.1007/s40520-024-02729-3
- 727 11. Sheng C, Yang K, He B, Du W, Cai Y, Han Y. Combination of gut microbiota and plasma  
728 amyloid- $\beta$  as a potential index for identifying preclinical Alzheimer's disease: a cross-  
729 sectional analysis from the SILCODE study. *Alzheimer's Research & Therapy*.  
730 2022;14(1):35. doi:10.1186/s13195-022-00977-x
- 731 12. Sochocka M, Donskow-Łysoniewska K, Diniz BS, Kurpas D, Brzozowska E, Leszek J. The  
732 Gut Microbiome Alterations and Inflammation-Driven Pathogenesis of Alzheimer's  
733 Disease—a Critical Review. *Mol Neurobiol*. 2019;56(3):1841-1851. doi:10.1007/s12035-  
734 018-1188-4
- 735 13. Heston MB, Hanslik KL, Zarbock KR, et al. Gut inflammation associated with age and  
736 Alzheimer's disease pathology: a human cohort study. *Sci Rep*. 2023;13(1):18924.  
737 doi:10.1038/s41598-023-45929-z

Gut Microbiome Compositional and Functional Features Associate with Alzheimer's Disease Pathology

- 738 14. Heintz-Buschart A, Wilmes P. Human Gut Microbiome: Function Matters. *Trends in*  
739 *Microbiology*. 2018;26(7):563-574. doi:10.1016/j.tim.2017.11.002
- 740 15. Chernikova MA, Flores GD, Kilroy E, Labus JS, Mayer EA, Aziz-Zadeh L. The Brain-Gut-  
741 Microbiome System: Pathways and Implications for Autism Spectrum Disorder. *Nutrients*.  
742 2021;13(12):4497. doi:10.3390/nu13124497
- 743 16. Kenna JE, Chua EG, Bakeberg M, et al. Changes in the Gut Microbiome and Predicted  
744 Functional Metabolic Effects in an Australian Parkinson's Disease Cohort. *Front Neurosci*.  
745 2021;15. doi:10.3389/fnins.2021.756951
- 746 17. Ananthakrishnan AN, Luo C, Yajnik V, et al. Gut Microbiome Function Predicts Response to  
747 Anti-integrin Biologic Therapy in Inflammatory Bowel Diseases. *Cell Host & Microbe*.  
748 2017;21(5):603-610.e3. doi:10.1016/j.chom.2017.04.010
- 749 18. Paley EL. Discovery of Gut Bacteria Specific to Alzheimer's Associated Diseases is a Clue  
750 to Understanding Disease Etiology: Meta-Analysis of Population-Based Data on Human Gut  
751 Metagenomics and Metabolomics. *Journal of Alzheimer's Disease*. 2019;72(1):319-355.  
752 doi:10.3233/JAD-190873
- 753 19. Laske C, Müller S, Preische O, et al. Signature of Alzheimer's Disease in Intestinal  
754 Microbiome: Results From the AlzBiom Study. *Front Neurosci*. 2022;16.  
755 doi:10.3389/fnins.2022.792996
- 756 20. Li J, Zhu S, Wang Y, et al. Metagenomic association analysis of cognitive impairment in  
757 community-dwelling older adults. *Neurobiology of Disease*. 2023;180:106081.  
758 doi:10.1016/j.nbd.2023.106081
- 759 21. Johnson SC, Kosciak RL, Jonaitis EM, et al. The Wisconsin Registry for Alzheimer's  
760 Prevention: A review of findings and current directions. *Alzheimers Dement (Amst)*.  
761 2018;10:130-142. doi:10.1016/j.dadm.2017.11.007
- 762 22. Darst BF, Kosciak RL, Racine AM, et al. Pathway-specific polygenic risk scores as predictors  
763 of  $\beta$ -amyloid deposition and cognitive function in a sample at increased risk for Alzheimer's  
764 disease. *J Alzheimers Dis*. 2017;55(2):473-484. doi:10.3233/JAD-160195
- 765 23. Albert MS, DeKosky ST, Dickson D, et al. The diagnosis of mild cognitive impairment due to  
766 Alzheimer's disease: Recommendations from the National Institute on Aging-Alzheimer's  
767 Association workgroups on diagnostic guidelines for Alzheimer's disease. *Alzheimer's &*  
768 *Dementia*. 2011;7(3):270-279. doi:10.1016/j.jalz.2011.03.008
- 769 24. McKhann GM, Knopman DS, Chertkow H, et al. The diagnosis of dementia due to  
770 Alzheimer's disease: recommendations from the National Institute on Aging-Alzheimer's  
771 Association workgroups on diagnostic guidelines for Alzheimer's disease. *Alzheimers*  
772 *Dement*. 2011;7(3):263-269. doi:10.1016/j.jalz.2011.03.005
- 773 25. Betthausen TJ, Kosciak RL, Jonaitis EM, et al. Amyloid and tau imaging biomarkers explain  
774 cognitive decline from late middle-age. *Brain*. 2020;143(1):320-335.  
775 doi:10.1093/brain/awz378

Gut Microbiome Compositional and Functional Features Associate with Alzheimer's Disease Pathology

- 776 26. Van Hulle C, Jonaitis EM, Betthausen TJ, et al. An examination of a novel multipanel of CSF  
777 biomarkers in the Alzheimer's disease clinical and pathological continuum. *Alzheimer's &*  
778 *Dementia*. 2021;17(3):431-445. doi:10.1002/alz.12204
- 779 27. Marotz C, Amir A, Humphrey G, Gaffney J, Gogul G, Knight R. DNA extraction for  
780 streamlined metagenomics of diverse environmental samples. *BioTechniques*.  
781 2017;62(6):290-293. doi:10.2144/000114559
- 782 28. Glenn TC, Nilsen RA, Kieran TJ, et al. Adapterama I: universal stubs and primers for 384  
783 unique dual-indexed or 147,456 combinatorially-indexed Illumina libraries (iTru & iNext).  
784 *PeerJ*. 2019;7:e7755. doi:10.7717/peerj.7755
- 785 29. Sanders JG, Nurk S, Salido RA, et al. Optimizing sequencing protocols for leaderboard  
786 metagenomics by combining long and short reads. *Genome Biology*. 2019;20(1):226.  
787 doi:10.1186/s13059-019-1834-9
- 788 30. Marotz C, Cavagnero KJ, Song SJ, et al. Evaluation of the Effect of Storage Methods on  
789 Fecal, Saliva, and Skin Microbiome Composition. *mSystems*. 2021;6(2):e01329-20.  
790 doi:10.1128/mSystems.01329-20
- 791 31. Sepich-Poore GD, McDonald D, Kopylova E, et al. Robustness of cancer microbiome  
792 signals over a broad range of methodological variation. *Oncogene*. 2024;43(15):1127-1148.  
793 doi:10.1038/s41388-024-02974-w
- 794 32. Chen S, Zhou Y, Chen Y, Gu J. fastp: an ultra-fast all-in-one FASTQ preprocessor.  
795 *Bioinformatics*. 2018;34(17):i884-i890. doi:10.1093/bioinformatics/bty560
- 796 33. Liao WW, Asri M, Ebler J, et al. A draft human pangenome reference. *Nature*.  
797 2023;617(7960):312-324. doi:10.1038/s41586-023-05896-x
- 798 34. Rhie A, Nurk S, Cechova M, et al. The complete sequence of a human Y chromosome.  
799 *Nature*. 2023;621(7978):344-354. doi:10.1038/s41586-023-06457-y
- 800 35. Schneider VA, Graves-Lindsay T, Howe K, et al. Evaluation of GRCh38 and de novo  
801 haploid genome assemblies demonstrates the enduring quality of the reference assembly.  
802 *Genome Res*. 2017;27(5):849-864. doi:10.1101/gr.213611.116
- 803 36. Li H. New strategies to improve minimap2 alignment accuracy. *Bioinformatics*.  
804 2021;37(23):4572-4574. doi:10.1093/bioinformatics/btab705
- 805 37. Danecek P, Bonfield JK, Liddle J, et al. Twelve years of SAMtools and BCFtools.  
806 *Gigascience*. 2021;10(2):giab008. doi:10.1093/gigascience/giab008
- 807 38. Edwards JA, Edwards RA. Fastq-pair: efficient synchronization of paired-end fastq files.  
808 Published online February 19, 2019;552885. doi:10.1101/552885
- 809 39. Tange O. *Gnu Parallel 2018*. [object Object]; 2018. doi:10.5281/ZENODO.1146014
- 810 40. Köster J. Rust-Bio: a fast and safe bioinformatics library. *Bioinformatics*. 2016;32(3):444-  
811 446. doi:10.1093/bioinformatics/btv573

Gut Microbiome Compositional and Functional Features Associate with Alzheimer's Disease Pathology

- 812 41. Gonzalez A, Navas-Molina JA, Kosciolk T, et al. Qiita: rapid, web-enabled microbiome  
813 meta-analysis. *Nat Methods*. 2018;15(10):796-798. doi:10.1038/s41592-018-0141-9
- 814 42. Zhu Q, Huang S, Gonzalez A, et al. Phylogeny-Aware Analysis of Metagenome Community  
815 Ecology Based on Matched Reference Genomes while Bypassing Taxonomy. *mSystems*.  
816 2022;7(2):e00167-22. doi:10.1128/msystems.00167-22
- 817 43. Hakim D, Wandro S, Zengler K, et al. Zebra: Static and Dynamic Genome Cover Thresholds  
818 with Overlapping References. *mSystems*. 2022;7(5):e0075822.  
819 doi:10.1128/msystems.00758-22
- 820 44. Bolyen E, Rideout JR, Dillon MR, et al. Reproducible, interactive, scalable and extensible  
821 microbiome data science using QIIME 2. *Nat Biotechnol*. 2019;37(8):852-857.  
822 doi:10.1038/s41587-019-0209-9
- 823 45. Betthausen TJ, Cody KA, Zammit MD, et al. In Vivo Characterization and Quantification of  
824 Neurofibrillary Tau PET Radioligand 18F-MK-6240 in Humans from Alzheimer Disease  
825 Dementia to Young Controls. *Journal of Nuclear Medicine*. 2019;60(1):93-99.  
826 doi:10.2967/jnumed.118.209650
- 827 46. Shannon CE. A mathematical theory of communication. *The Bell System Technical Journal*.  
828 1948;27(3):379-423. doi:10.1002/j.1538-7305.1948.tb01338.x
- 829 47. Pielou EC. The measurement of diversity in different types of biological collections. *Journal*  
830 *of Theoretical Biology*. 1966;13:131-144. doi:10.1016/0022-5193(66)90013-0
- 831 48. Faith DP. Conservation evaluation and phylogenetic diversity. *Biological Conservation*.  
832 1992;61(1):1-10. doi:10.1016/0006-3207(92)91201-3
- 833 49. Sørensen T, Sørensen T, Biering-Sørensen T, Sørensen T, Sorensen JT. *A Method of*  
834 *Establishing Group of Equal Amplitude in Plant Sociobiology Based on Similarity of Species*  
835 *Content and Its Application to Analyses of the Vegetation on Danish Commons*. Vol 5.  
836 København: I kommission hos E. Munksgaard; 1948.  
837 <https://api.semanticscholar.org/CorpusID:135206594>
- 838 50. Lozupone CA, Hamady M, Kelley ST, Knight R. Quantitative and Qualitative  $\beta$  Diversity  
839 Measures Lead to Different Insights into Factors That Structure Microbial Communities.  
840 *Applied and Environmental Microbiology*. 2007;73(5):1576-1585. doi:10.1128/AEM.01996-  
841 06
- 842 51. Lozupone C, Knight R. UniFrac: a New Phylogenetic Method for Comparing Microbial  
843 Communities. *Applied and Environmental Microbiology*. 2005;71(12):8228-8235.  
844 doi:10.1128/AEM.71.12.8228-8235.2005
- 845 52. Rahman G, Morton JT, Martino C, et al. BIRDMan: A Bayesian differential abundance  
846 framework that enables robust inference of host-microbe associations. *bioRxiv*. Published  
847 online February 2, 2023:2023.01.30.526328. doi:10.1101/2023.01.30.526328
- 848 53. Mao X, Cai T, Olyarchuk JG, Wei L. Automated genome annotation and pathway  
849 identification using the KEGG Orthology (KO) as a controlled vocabulary. *Bioinformatics*.  
850 2005;21(19):3787-3793. doi:10.1093/bioinformatics/bti430

Gut Microbiome Compositional and Functional Features Associate with Alzheimer's Disease Pathology

- 851 54. Martino C, Morton JT, Marotz CA, et al. A Novel Sparse Compositional Technique Reveals  
852 Microbial Perturbations. *mSystems*. 2019;4(1):10.1128/msystems.00016-19.  
853 doi:10.1128/msystems.00016-19
- 854 55. Anderson MJ. Permutational Multivariate Analysis of Variance (PERMANOVA). In: *Wiley*  
855 *StatsRef: Statistics Reference Online*. John Wiley & Sons, Ltd; 2017:1-15.  
856 doi:10.1002/9781118445112.stat07841
- 857 56. Pedregosa F, Varoquaux G, Gramfort A, et al. Scikit-learn: Machine Learning in Python.  
858 *Journal of Machine Learning Research*. 2011;12(85):2825-2830. Accessed August 12,  
859 2024. <http://jmlr.org/papers/v12/pedregosa11a.html>
- 860 57. Virtanen P, Gommers R, Oliphant TE, et al. SciPy 1.0: fundamental algorithms for scientific  
861 computing in Python. *Nat Methods*. 2020;17(3):261-272. doi:10.1038/s41592-019-0686-2
- 862 58. van der Walt S, Colbert SC, Varoquaux G. The NumPy Array: A Structure for Efficient  
863 Numerical Computation. *Computing in Science & Engineering*. 2011;13(2):22-30.  
864 doi:10.1109/MCSE.2011.37
- 865 59. Hunter JD. Matplotlib: A 2D Graphics Environment. *Computing in Science & Engineering*.  
866 2007;9(3):90-95. doi:10.1109/MCSE.2007.55
- 867 60. Waskom ML. seaborn: statistical data visualization. *Journal of Open Source Software*.  
868 2021;6(60):3021. doi:10.21105/joss.03021
- 869 61. Hou M, Xu G, Ran M, Luo W, Wang H. APOE- $\epsilon$ 4 Carrier Status and Gut Microbiota  
870 Dysbiosis in Patients With Alzheimer Disease. *Front Neurosci*. 2021;15.  
871 doi:10.3389/fnins.2021.619051
- 872 62. Kaiyrykzy A, Kozhakhmetov S, Babenko D, et al. Study of gut microbiota alterations in  
873 Alzheimer's dementia patients from Kazakhstan. *Sci Rep*. 2022;12:15115.  
874 doi:10.1038/s41598-022-19393-0
- 875 63. Jung JH, Kim G, Byun MS, et al. Gut microbiome alterations in preclinical Alzheimer's  
876 disease. *PLOS ONE*. 2022;17(11):e0278276. doi:10.1371/journal.pone.0278276
- 877 64. Zajac DJ, Green SJ, Johnson LA, Estus S. APOE genetics influence murine gut  
878 microbiome. *Sci Rep*. 2022;12(1):1906. doi:10.1038/s41598-022-05763-1
- 879 65. Tran TTT, Corsini S, Kellingray L, et al. APOE genotype influences the gut microbiome  
880 structure and function in humans and mice: relevance for Alzheimer's disease  
881 pathophysiology. *FASEB J*. 2019;33(7):8221-8231. doi:10.1096/fj.201900071R
- 882 66. Xiao-hang Q, Si-yue C, Hui-dong T. Multi-strain probiotics ameliorate Alzheimer's-like  
883 cognitive impairment and pathological changes through the AKT/GSK-3 $\beta$  pathway in  
884 senescence-accelerated mouse prone 8 mice. *Brain, Behavior, and Immunity*. 2024;119:14-  
885 27. doi:10.1016/j.bbi.2024.03.031
- 886 67. Liu P, Jia XZ, Chen Y, et al. Gut microbiota interacts with intrinsic brain activity of patients  
887 with amnesic mild cognitive impairment. *CNS Neuroscience & Therapeutics*.  
888 2021;27(2):163-173. doi:10.1111/cns.13451

Gut Microbiome Compositional and Functional Features Associate with Alzheimer's Disease Pathology

- 889 68. Li B, He Y, Ma J, et al. Mild cognitive impairment has similar alterations as Alzheimer's  
890 disease in gut microbiota. *Alzheimers Dement.* 2019;15(10):1357-1366.  
891 doi:10.1016/j.jalz.2019.07.002
- 892 69. Nagpal R, Neth BJ, Wang S, Craft S, Yadav H. Modified Mediterranean-ketogenic diet  
893 modulates gut microbiome and short-chain fatty acids in association with Alzheimer's  
894 disease markers in subjects with mild cognitive impairment. *eBioMedicine.* 2019;47:529-  
895 542. doi:10.1016/j.ebiom.2019.08.032
- 896 70. Li Z, Zhou J, Liang H, et al. Differences in Alpha Diversity of Gut Microbiota in Neurological  
897 Diseases. *Front Neurosci.* 2022;16. doi:10.3389/fnins.2022.879318
- 898 71. Jovel J, Patterson J, Wang W, et al. Characterization of the Gut Microbiome Using 16S or  
899 Shotgun Metagenomics. *Front Microbiol.* 2016;7. doi:10.3389/fmicb.2016.00459
- 900 72. Verhaar BJH, Hendriksen HMA, de Leeuw FA, et al. Gut Microbiota Composition Is Related  
901 to AD Pathology. *Front Immunol.* 2022;12. doi:10.3389/fimmu.2021.794519
- 902 73. Cattaneo A, Cattane N, Galluzzi S, et al. Association of brain amyloidosis with pro-  
903 inflammatory gut bacterial taxa and peripheral inflammation markers in cognitively impaired  
904 elderly. *Neurobiology of Aging.* 2017;49:60-68. doi:10.1016/j.neurobiolaging.2016.08.019
- 905 74. Haran JP, Bhattarai SK, Foley SE, et al. Alzheimer's Disease Microbiome Is Associated with  
906 Dysregulation of the Anti-Inflammatory P-Glycoprotein Pathway. *mBio.*  
907 2019;10(3):10.1128/mbio.00632-19. doi:10.1128/mbio.00632-19
- 908 75. Cammann D, Lu Y, Cummings MJ, et al. Genetic correlations between Alzheimer's disease  
909 and gut microbiome genera. *Sci Rep.* 2023;13(1):5258. doi:10.1038/s41598-023-31730-5
- 910 76. Wasén C, Beauchamp LC, Vincentini J, et al. Bacteroidota inhibit microglia clearance of  
911 amyloid-beta and promote plaque deposition in Alzheimer's disease mouse models. *Nat*  
912 *Commun.* 2024;15:3872. doi:10.1038/s41467-024-47683-w
- 913 77. Xia Y, Xiao Y, Wang ZH, et al. Bacteroides Fragilis in the gut microbiomes of Alzheimer's  
914 disease activates microglia and triggers pathogenesis in neuronal C/EBP $\beta$  transgenic mice.  
915 *Nat Commun.* 2023;14(1):5471. doi:10.1038/s41467-023-41283-w
- 916 78. Claesson MJ, Cusack S, O'Sullivan O, et al. Composition, variability, and temporal stability  
917 of the intestinal microbiota of the elderly. *Proceedings of the National Academy of Sciences.*  
918 2011;108(supplement\_1):4586-4591. doi:10.1073/pnas.1000097107
- 919 79. Wilmanski T, Diener C, Rappaport N, et al. Gut microbiome pattern reflects healthy ageing  
920 and predicts survival in humans. *Nat Metab.* 2021;3(2):274-286. doi:10.1038/s42255-021-  
921 00348-0
- 922 80. Guo M, Peng J, Huang X, Xiao L, Huang F, Zuo Z. Gut Microbiome Features of Chinese  
923 Patients Newly Diagnosed with Alzheimer's Disease or Mild Cognitive Impairment. *Journal*  
924 *of Alzheimer's Disease.* 2021;80(1):299-310. doi:10.3233/JAD-201040

Gut Microbiome Compositional and Functional Features Associate with Alzheimer's Disease Pathology

- 925 81. Pignatelli P, Nuccio F, Piattelli A, Curia MC. The Role of *Fusobacterium nucleatum* in Oral  
926 and Colorectal Carcinogenesis. *Microorganisms*. 2023;11(9):2358.  
927 doi:10.3390/microorganisms11092358
- 928 82. Zepeda-Rivera M, Minot SS, Bouzek H, et al. A distinct *Fusobacterium nucleatum* clade  
929 dominates the colorectal cancer niche. *Nature*. 2024;628(8007):424-432.  
930 doi:10.1038/s41586-024-07182-w
- 931 83. Wu H, Qiu W, Zhu X, et al. The Periodontal Pathogen *Fusobacterium nucleatum*  
932 Exacerbates Alzheimer's Pathogenesis via Specific Pathways. *Front Aging Neurosci*.  
933 2022;14. doi:10.3389/fnagi.2022.912709
- 934 84. Yan C, Diao Q, Zhao Y, et al. *Fusobacterium nucleatum* infection-induced  
935 neurodegeneration and abnormal gut microbiota composition in Alzheimer's disease-like  
936 rats. *Front Neurosci*. 2022;16. doi:10.3389/fnins.2022.884543
- 937 85. Ling Z, Zhu M, Yan X, et al. Structural and Functional Dysbiosis of Fecal Microbiota in  
938 Chinese Patients With Alzheimer's Disease. *Front Cell Dev Biol*. 2021;8.  
939 doi:10.3389/fcell.2020.634069
- 940 86. Rouskas K, Mamalaki E, Ntanasi E, et al. Distinct gut microbiota profiles may characterize  
941 amyloid beta pathology and mild cognitive impairment. Published online May 3,  
942 2024:2024.05.01.24306673. doi:10.1101/2024.05.01.24306673
- 943 87. Dunham SJB, McNair KA, Adams ED, et al. Longitudinal Analysis of the Microbiome and  
944 Metabolome in the 5xfAD Mouse Model of Alzheimer's Disease. *mBio*. 2022;13(6):e01794-  
945 22. doi:10.1128/mbio.01794-22
- 946 88. Sun P, Zhu H, Li X, et al. Comparative Metagenomics and Metabolomes Reveals Abnormal  
947 Metabolism Activity Is Associated with Gut Microbiota in Alzheimer's Disease Mice.  
948 *International Journal of Molecular Sciences*. 2022;23(19):11560.  
949 doi:10.3390/ijms231911560
- 950 89. Abraham D, Feher J, Scuderi GL, et al. Exercise and probiotics attenuate the development  
951 of Alzheimer's disease in transgenic mice: Role of microbiome. *Experimental Gerontology*.  
952 2019;115:122-131. doi:10.1016/j.exger.2018.12.005
- 953 90. Fang Chuang Y. Altered Gut Microbiota in Dementia and Mild Cognitive Impairment in  
954 Community-Dwelling Older Adults in Taiwan. *Alzheimer's & Dementia*.  
955 2023;19(S12):e075212. doi:10.1002/alz.075212
- 956 91. Martinelli F, Heinken A, Henning AK, et al. Whole-body metabolic modelling reveals  
957 microbiome and genomic interactions on reduced urine formate levels in Alzheimer's  
958 disease. *Sci Rep*. 2024;14(1):6095. doi:10.1038/s41598-024-55960-3
- 959  
960  
961  
962  
963  
964



## 965 **ACKNOWLEDGMENTS**

966 This project was enabled in part by The Alzheimer Gut Microbiome Project (AGMP) and the  
967 Alzheimer's Disease Metabolomics Consortium (ADMC) funded wholly or in part by the  
968 following NIA grants thereto: U01AG061359 and U19AG063744 awarded to Dr. Kaddurah-  
969 Daouk at Duke University in partnership with multiple academic institutions. As such, the  
970 investigators within the AGMP and the ADMC, not listed specifically in this publication's author's  
971 list, provided data along with its pre-processing and prepared it for analysis, but did not  
972 participate in analysis or writing of this manuscript. A listing of AGMP Investigators can be found  
973 at [alzheimergut.org/meet-the-team/](https://alzheimergut.org/meet-the-team/). A complete listing of ADMC investigators can be found  
974 at: [sites.duke.edu/adnimetab/team/](https://sites.duke.edu/adnimetab/team/). The IGM S10 grant S10 OD026929 was awarded to Dr.  
975 Rob Knight at the University of California San Diego IGM Genomics Center. This publication  
976 includes data generated at the University of California San Diego IGM Genomics Center utilizing  
977 an Illumina NovaSeq 6000 that was purchased with funding from a National Institutes of Health  
978 SIG grant (#S10 OD026929).

979 This work was also supported by the National Institute on Aging Grant R01AG070973 (B.B.B.,  
980 F.E.R., T.K.U.), National Institute on Aging Grant R01AG083883 (T.K.U., B.B.B., F.E.R.), Vilas  
981 Early-Career Investigator Award (T.K.U.), and National Institute on Aging Grant P30AG062715  
982 (which in part supported B.B.B., T.K.U.).

983 Dr. Zetterberg is a Wallenberg Scholar and a Distinguished Professor at the Swedish Research  
984 Council supported by grants from the Swedish Research Council (#2023-00356; #2022-01018  
985 and #2019-02397), the European Union's Horizon Europe research and innovation programme  
986 under grant agreement No 101053962, Swedish State Support for Clinical Research  
987 (#ALFGBG-71320), the Alzheimer Drug Discovery Foundation (ADDF), USA (#201809-  
988 2016862), the AD Strategic Fund and the Alzheimer's Association (#ADSF-21-831376-C,  
989 #ADSF-21-831381-C, #ADSF-21-831377-C, and #ADSF-24-1284328-C), the European  
990 Partnership on Metrology, co-financed from the European Union's Horizon Europe Research  
991 and Innovation Programme and by the Participating States (NEuroBioStand, #22HLT07), the  
992 Bluefield Project, Cure Alzheimer's Fund, the Olav Thon Foundation, the Erling-Persson Family  
993 Foundation, Familjen Rönströms Stiftelse, Stiftelsen för Gamla Tjänarinnor, Hjärtfonden,  
994 Sweden (#FO2022-0270), the European Union's Horizon 2020 research and innovation  
995 programme under the Marie Skłodowska-Curie grant agreement No 860197 (MIRIADE), the  
996 European Union Joint Programme – Neurodegenerative Disease Research (JPND2021-00694),  
997 the National Institute for Health and Care Research University College London Hospitals  
998 Biomedical Research Centre, and the UK Dementia Research Institute at UCL (UKDRI-1003).  
999 COBAS is a trademark of Roche. All other product names and trademarks are the property of  
1000 their respective owners. The NeuroToolKit is a panel of exploratory prototype assays designed  
1001 to robustly evaluate biomarkers associated with key pathologic events characteristic of AD and  
1002 other neurological disorders, used for research purposes only and not approved for clinical use  
1003 (Roche Diagnostics International Ltd, Rotkreuz, Switzerland).

1004  
1005  
1006  
1007  
1008

## 1009 **CONFLICT OF INTEREST STATEMENT**

1010 Dr. Kaddurah-Daouk is an inventor on a series of patents on use of metabolomics for the  
1011 diagnosis and treatment of CNS diseases and holds equity in Metabolon Inc., Chymia LLC and  
1012 PsyProtix.

1013 Dr. Rob Knight is a scientific advisory board member, and consultant for BiomeSense, Inc., has  
1014 equity and receives income. He is a scientific advisory board member and has equity in  
1015 GenCirq. He is a consultant for DayTwo, and receives income. He has equity in and acts as a  
1016 consultant for Cybele. He is a co-founder of Biota, Inc., and has equity. He is a cofounder of  
1017 Micronoma, and has equity and is a scientific advisory board member. The terms of these  
1018 arrangements have been reviewed and approved by the University of California, San Diego in  
1019 accordance with its conflict of interest policies.

1020 Dr. Zetterberg has served at scientific advisory boards and/or as a consultant for Abbvie,  
1021 Acumen, Alector, Alzinova, ALZPath, Amylyx, Annexon, Apellis, Artery Therapeutics,  
1022 AZTherapies, Cognito Therapeutics, CogRx, Denali, Eisai, LabCorp, Merry Life, Nervgen, Novo  
1023 Nordisk, Optoceutics, Passage Bio, Pinteon Therapeutics, Prothena, Red Abbey Labs,  
1024 reMYND, Roche, Samumed, Siemens Healthineers, Triplet Therapeutics, and Wave, has given  
1025 lectures in symposia sponsored by Alzecure, Biogen, Celectricon, Fujirebio, Lilly, Novo Nordisk,  
1026 and Roche, and is a co-founder of Brain Biomarker Solutions in Gothenburg AB (BBS), which is  
1027 a part of the GU Ventures Incubator Program (outside submitted work).

1028 Daniel McDonald is a consultant for, and has equity in, BiomeSense, Inc. The terms of this  
1029 arrangement has been reviewed and approved by the University of California, San Diego in  
1030 accordance with its conflict of interest policies.

1031  
1032

## 1033 **CONSENT STATEMENT**

1034 All human subjects provided informed consent to participate in this study.

1035  
1036

## 1037 **DATA AVAILABILITY**

1038 Samples were provided by the University of Wisconsin Alzheimer's Disease Research Center.  
1039 Clinical data can be requested from the National Alzheimer's Coordinating Center  
1040 ([naccddata.org/](http://naccddata.org/)).

1041 Data will be available in the Synapse AD Knowledge Portal.

1042 Gut Microbiome data is stored and accessible via the University of California, San Diego Qiita  
1043 platform ([qiita.ucsd.edu/](http://qiita.ucsd.edu/)).

1044  
1045

## 1046 **Keywords**

1047 Alzheimer's disease; Gut microbiome; Composition; Function; Cerebrospinal fluid; Biomarkers;  
1048 Differential abundance; Pathology

1049

1050

## 1051 **Figure legends**

1052

### 1053 **Figure 1**

1054 **Alpha and beta diversity metrics across AD groups.** (A-C) Shannon, Evenness, and Faith's  
1055 PD metrics for individuals categorized by clinical diagnosis (CU vs. Dementia-AD). (D-F) Metrics  
1056 for amyloid status (Negative vs. Positive). (G-I) Metrics across *APOE*  $\epsilon 4$  status (Negative vs.  
1057 Positive). Each box plot is overlaid with individual data points, enhancing visualization of the  
1058 data distribution within each group. Kruskal-Wallis test was used to determine statistical  
1059 significance. (J-L) Differences in beta diversity metrics (Bray Curtis, Weighted UniFrac, and  
1060 Unweighted UniFrac, respectively) for individuals categorized by clinical diagnosis (CU vs.  
1061 Dementia-AD). (M-O) Metrics for amyloid status (Negative vs. Positive). (P-R) Metrics across  
1062 *APOE*  $\epsilon 4$  status (Negative vs. Positive). Principal coordinates (PC)1 and PC2 axes represent  
1063 the most variance in data. Each plot is color-coded by the respective group, highlighting the  
1064 spatial distribution and clustering based on the dissimilarity indices. PERMANOVA was used to  
1065 determine statistical significance.

1066

### 1067 **Figure 2**

1068 **Differential abundance (DA) across AD groups.** Forest plots illustrating the DA of microbial  
1069 features associated with AD groups. (A, D, G, and J) Contrasts in the abundance of various  
1070 bacterial taxa at (A) phylum, (D) family, (G) genus, and (J) species levels between AD dementia  
1071 and CU. (B, E, H, and K) The differences in abundance at these taxonomic levels between A+  
1072 and A- individuals. (C, F, I, and L) The microbial features differentially abundant between *APOE*  
1073  $\epsilon 4+$  and *APOE*  $\epsilon 4-$  groups. The x-axes quantify the log ratio of presence between groups, with  
1074 values above one indicating a higher abundance in the first-mentioned group. Circles denote  
1075 "Top" features, indicating a positive association with AD groups (dementia diagnosis, amyloid  
1076 positivity, and *APOE*  $\epsilon 4$  positivity), whereas triangles denote "Bottom" features, indicating a  
1077 negative association. The lines are color-coded by unique phylum as labeled in the legend. DA  
1078 analysis was conducted using BIRDMAn.

1079

### 1080 **Figure 3**

1081 **Comparative analysis of top and bottom features across AD groups.** Box plots comparing  
1082 the distribution of log-transformed ratios of differentially abundant microbial species in relation to  
1083 diagnosis, amyloid status, and *APOE*  $\epsilon 4$  status. (A-C) The log-transformed ratios of microbes for  
1084 diagnosis groups (AD vs CU). (D-F) The log-transformed ratios of amyloid-related microbes (A+  
1085 vs A-). (G-I) The log-transformed ratios of *APOE*  $\epsilon 4$ -related microbes (*APOE*  $\epsilon 4+$  vs *APOE*  
1086  $\epsilon 4-$ ). Each column compares the CU and AD groups (A, D, and G), A+ and A- groups (B, E,  
1087 and H), and *APOE*  $\epsilon 4+$  and *APOE*  $\epsilon 4-$  groups (C, F, and I). Each panel includes a Kruskal-

1088 Wallis test statistic and associated  $P$  value, indicating the statistical significance of the  
1089 differences observed.

1090

#### 1091 **Figure 4**

1092 **Venn-diagram of co-occurrence of microbial features across AD groups.** The diagrams on  
1093 the left column (A, C, E, and G) depict the Top (positively-associated) differentially abundant  
1094 features, while those on the right column (B, D, F, and H) show the Bottom (negatively-  
1095 associated) differentially abundant features. (A and B) Top and Bottom microbial phyla,  
1096 respectively. These diagrams identify unique and shared phyla associated with each of the  
1097 three AD groups. (C and D) Top and Bottom microbial families, respectively. These diagrams  
1098 highlight the family-level microbial differences that correlate with AD diagnosis, amyloid  
1099 presence, and *APOE*  $\epsilon 4$  genotype presence. (E and F) Top and Bottom microbial genera,  
1100 respectively. These diagrams provide insight into the genus-level microbial composition  
1101 influenced by the specified AD groups. (G and H) Top and Bottom microbial species,  
1102 respectively. These diagrams detail the number of species that are unique and shared across  
1103 the three AD groups. Each diagram contains colored regions representing intersections  
1104 between the groups: red for dementia, green for amyloid, and blue for *APOE*  $\epsilon 4$ . The numbers  
1105 within each segment of the diagrams indicate the count of microbial features unique to or  
1106 shared between the conditions. Specific microbial features are listed in **Table S2**.

1107

#### 1108 **Figure 5**

1109 **Comparison of log-transformed dementia biomarker ratios in CU and AD dementia**  
1110 **across two cohorts.** (A) The results from the MARS cohort. Box plots show the distribution of  
1111 log-transformed ratios of top dementia biomarkers to bottom dementia biomarkers for CU  
1112 individuals (light blue) and AD dementia (dark blue) (Kruskal-Wallis = 31.81,  $P$  value < .001). (B)  
1113 The results from a larger validation cohort ( $n = 448$ ). Box plots present the distribution of log-  
1114 transformed ratios of top dementia biomarkers to bottom dementia biomarkers found in the  
1115 MARS cohort for CU individuals (light blue) and people with AD dementia (dark blue) (Kruskal-  
1116 Wallis = 5.59,  $P$  value = .02). Each point represents an individual sample, with the boxes  
1117 indicating the interquartile range (IQR) and the whiskers extending to 1.5 times the IQR. The  
1118 horizontal line within each box denotes the median value.

1119

#### 1120 **Figure 6**

1121 **Differentially abundant microbial pathways between AD and CU.** (A) The distribution of the  
1122 log ratios of Top/Bottom pathway features between AD (orange) and CU (blue) was shown in a  
1123 box plot. Mann-Whitney  $U$  test was performed to determine statistical significance. Asterisks  
1124 indicate a significant difference between AD (4.90) and CU (2.74) groups in the median of the  
1125 log ratios of Top/Bottom pathway features ( $P$  value < .001). (B) A total of 36 differentially  
1126 abundant features of microbial species and their corresponding pathways between AD and CU  
1127 were displayed in a forest plot. Circles denote "Top" features, indicating a positive association  
1128 with AD, whereas triangles denote "Bottom" features, indicating a negative association. The  
1129 lines are color-coded by unique species and their corresponding pathways. DA analysis was  
1130 conducted using BIRDMAN. (C) RPCA on the clinical diagnosis group and a biplot of  
1131 microbiome pathway features and their corresponding species. Each point represents an

## Gut Microbiome Compositional and Functional Features Associate with Alzheimer's Disease Pathology

1132 individual sample color-coded by the respective group, with CU colored in blue and AD colored  
1133 in orange. Vectors represent the direction (arrows) and magnitude (length) of the contribution of  
1134 feature variables to the principal components (PCs). Vectors in red indicate Top features and  
1135 vectors in green indicate Bottom features. PC1 and PC2 axes represent the most variance in  
1136 data. Statistical analysis on RPCA was performed with PERMANOVA between AD and CU  
1137 groups.

1138

### 1139 **Figure 7**

1140 **Heatmap illustrating the associations between gut microbiome compositional and**  
1141 **functional features and CSF biomarkers in AD and related pathologies.** (A) This heatmap  
1142 represents the coefficients of regression analysis between the top and bottom 20 gut microbial  
1143 species linked to dementia and CSF biomarkers in two groups: Top (more abundant in AD,  
1144 denoted by the pink bar) and Bottom (less abundant in AD, denoted by the green bar). The color  
1145 scale indicates the strength and direction of the associations, with red representing positive  
1146 associations and blue representing negative associations. The intensity of the color corresponds  
1147 to the magnitude of the coefficient. Listed on the left are the gut microbiome species that were  
1148 identified as more or less abundant in dementia-AD through BIRDMA. (B) The heatmap  
1149 depicts the coefficients of regression analysis between the gut microbial pathways and CSF  
1150 biomarkers. Coefficients are scaled by colors indicating the strength and direction of the  
1151 associations, with green representing positive associations and pink representing negative  
1152 associations. The intensity of the color corresponds to the magnitude (strength) of the  
1153 coefficient. Microbial species and their associated pathway features are listed on the left of the  
1154 plot and two groups (Top: more abundant in AD, denoted by the light pink bar; and Bottom: less  
1155 abundant in AD or more abundant in CU, denoted by the light green bar) from DA analysis using  
1156 BIRDMA are displayed on the right of the plot.

1157 The biomarkers listed along the bottom include amyloid pathology ( $A\beta_{42}/A\beta_{40}$ ), tau  
1158 pathophysiology (pTau<sub>181</sub> and tTau), neurodegeneration (NfL), synaptic dysfunction and injury  
1159 (neurogranin and  $\alpha$ -synuclein), inflammation (IL-6), and glial activation (S100B, GFAP, YKL-40,  
1160 and sTREM2). Asterisks indicate the level of statistical significance of the associations: \*\*\* $P <$   
1161 .001, \*\* $P <$  .01, and \* $P <$  .05 (uncorrected).

**Table 1. Participant demographics at fecal sample collection by clinical diagnosis.**

| Variable                  | N   | Overall, N = 232 <sup>†</sup> | Dementia-AD, N = 24 <sup>†</sup> | CU, N = 208 <sup>†</sup> | P value <sup>‡</sup> |
|---------------------------|-----|-------------------------------|----------------------------------|--------------------------|----------------------|
| <b>Age</b>                | 232 | 67 (±7)                       | 71 (±7) <sup>§**</sup>           | 66 (±7)                  | .002                 |
| <b>Sex</b>                | 232 |                               |                                  |                          | .7                   |
| Female                    |     | 142 (61%)                     | 16 (67%)                         | 126 (61%)                |                      |
| Male                      |     | 90 (39%)                      | 8 (33%)                          | 82 (39%)                 |                      |
| <b>Race</b>               | 232 |                               |                                  |                          | >0.9                 |
| Black or African American |     | 10 (4.3%)                     | 1 (4.2%)                         | 9 (4.3%)                 |                      |
| White                     |     | 222 (96%)                     | 23 (96%)                         | 199 (96%)                |                      |
| <b>APOE genotype</b>      | 227 |                               |                                  |                          | <.001                |
| ε2ε3                      |     | 22 (9.7%)                     | 0 (0%)                           | 22 (11%)                 |                      |
| ε3ε3                      |     | 120 (53%)                     | 5 (21%) <sup>§**</sup>           | 115 (57%)                |                      |
| ε2ε4                      |     | 5 (2.2%)                      | 0 (0%)                           | 5 (2.5%)                 |                      |
| ε3ε4                      |     | 64 (28%)                      | 11 (46%)                         | 53 (26%)                 |                      |
| ε4ε4                      |     | 16 (7.0%)                     | 8 (33%) <sup>§****</sup>         | 8 (3.9%)                 |                      |
| <b>APOE ε4 genotype</b>   | 227 |                               |                                  |                          | <.001                |
| Negative (non-carrier)    |     | 142 (63%)                     | 5 (21%)                          | 137 (67%)                |                      |
| Positive (carrier)        |     | 85 (37%)                      | 19 (79%) <sup>§****</sup>        | 66 (33%)                 |                      |
| <b>Bristol stool type</b> | 232 |                               |                                  |                          | .031                 |
| 1                         |     | 16 (6.9%)                     | 0 (0%)                           | 16 (7.7%)                |                      |
| 2                         |     | 19 (8.2%)                     | 3 (13%)                          | 16 (7.7%)                |                      |
| 3                         |     | 35 (15%)                      | 9 (38%) <sup>§*</sup>            | 26 (13%)                 |                      |
| 4                         |     | 105 (45%)                     | 6 (25%)                          | 99 (48%)                 |                      |
| 5                         |     | 37 (16%)                      | 4 (17%)                          | 33 (16%)                 |                      |
| 6                         |     | 19 (8.2%)                     | 2 (8.3%)                         | 17 (8.2%)                |                      |
| 7                         |     | 1 (0.4%)                      | 0 (0%)                           | 1 (0.5%)                 |                      |
| <b>BMI</b>                | 232 | 28.2 (±5.4)                   | 26.0 (±4.7) <sup>§*</sup>        | 28.4 (±5.4)              | .030                 |
| <b>Amyloid status</b>     | 145 |                               |                                  |                          | <.001                |
| 0 (A-)                    |     | 104 (72%)                     | 0 (0%)                           | 104 (78%)                |                      |
| 1 (A+)                    |     | 41 (28%)                      | 12 (100%) <sup>§****</sup>       | 29 (22%)                 |                      |
| <b>Medication status</b>  | 232 |                               |                                  |                          | .7                   |
| medicated                 |     | 213 (92%)                     | 23 (96%)                         | 190 (91%)                |                      |
| non-medicated             |     | 19 (8.2%)                     | 1 (4.2%)                         | 18 (8.7%)                |                      |

Abbreviations: AD, Alzheimer's disease; CU, cognitively unimpaired; *APOE*, apolipoprotein E; BMI, body mass index; A, amyloid status.

NOTE. The Bristol stool types are classification tools for the diagnosis of human feces form.

<sup>†</sup>Mean (±SD); n (%)

‡Kruskal-Wallis rank sum test; Pearson's Chi-squared test

§Significantly different Dementia-AD vs CU

\* $P < .05$ , \*\* $P < .01$ , \*\*\* $P < .001$ , \*\*\*\* $P < .0001$  ( $P$  values are Bonferroni test corrected)

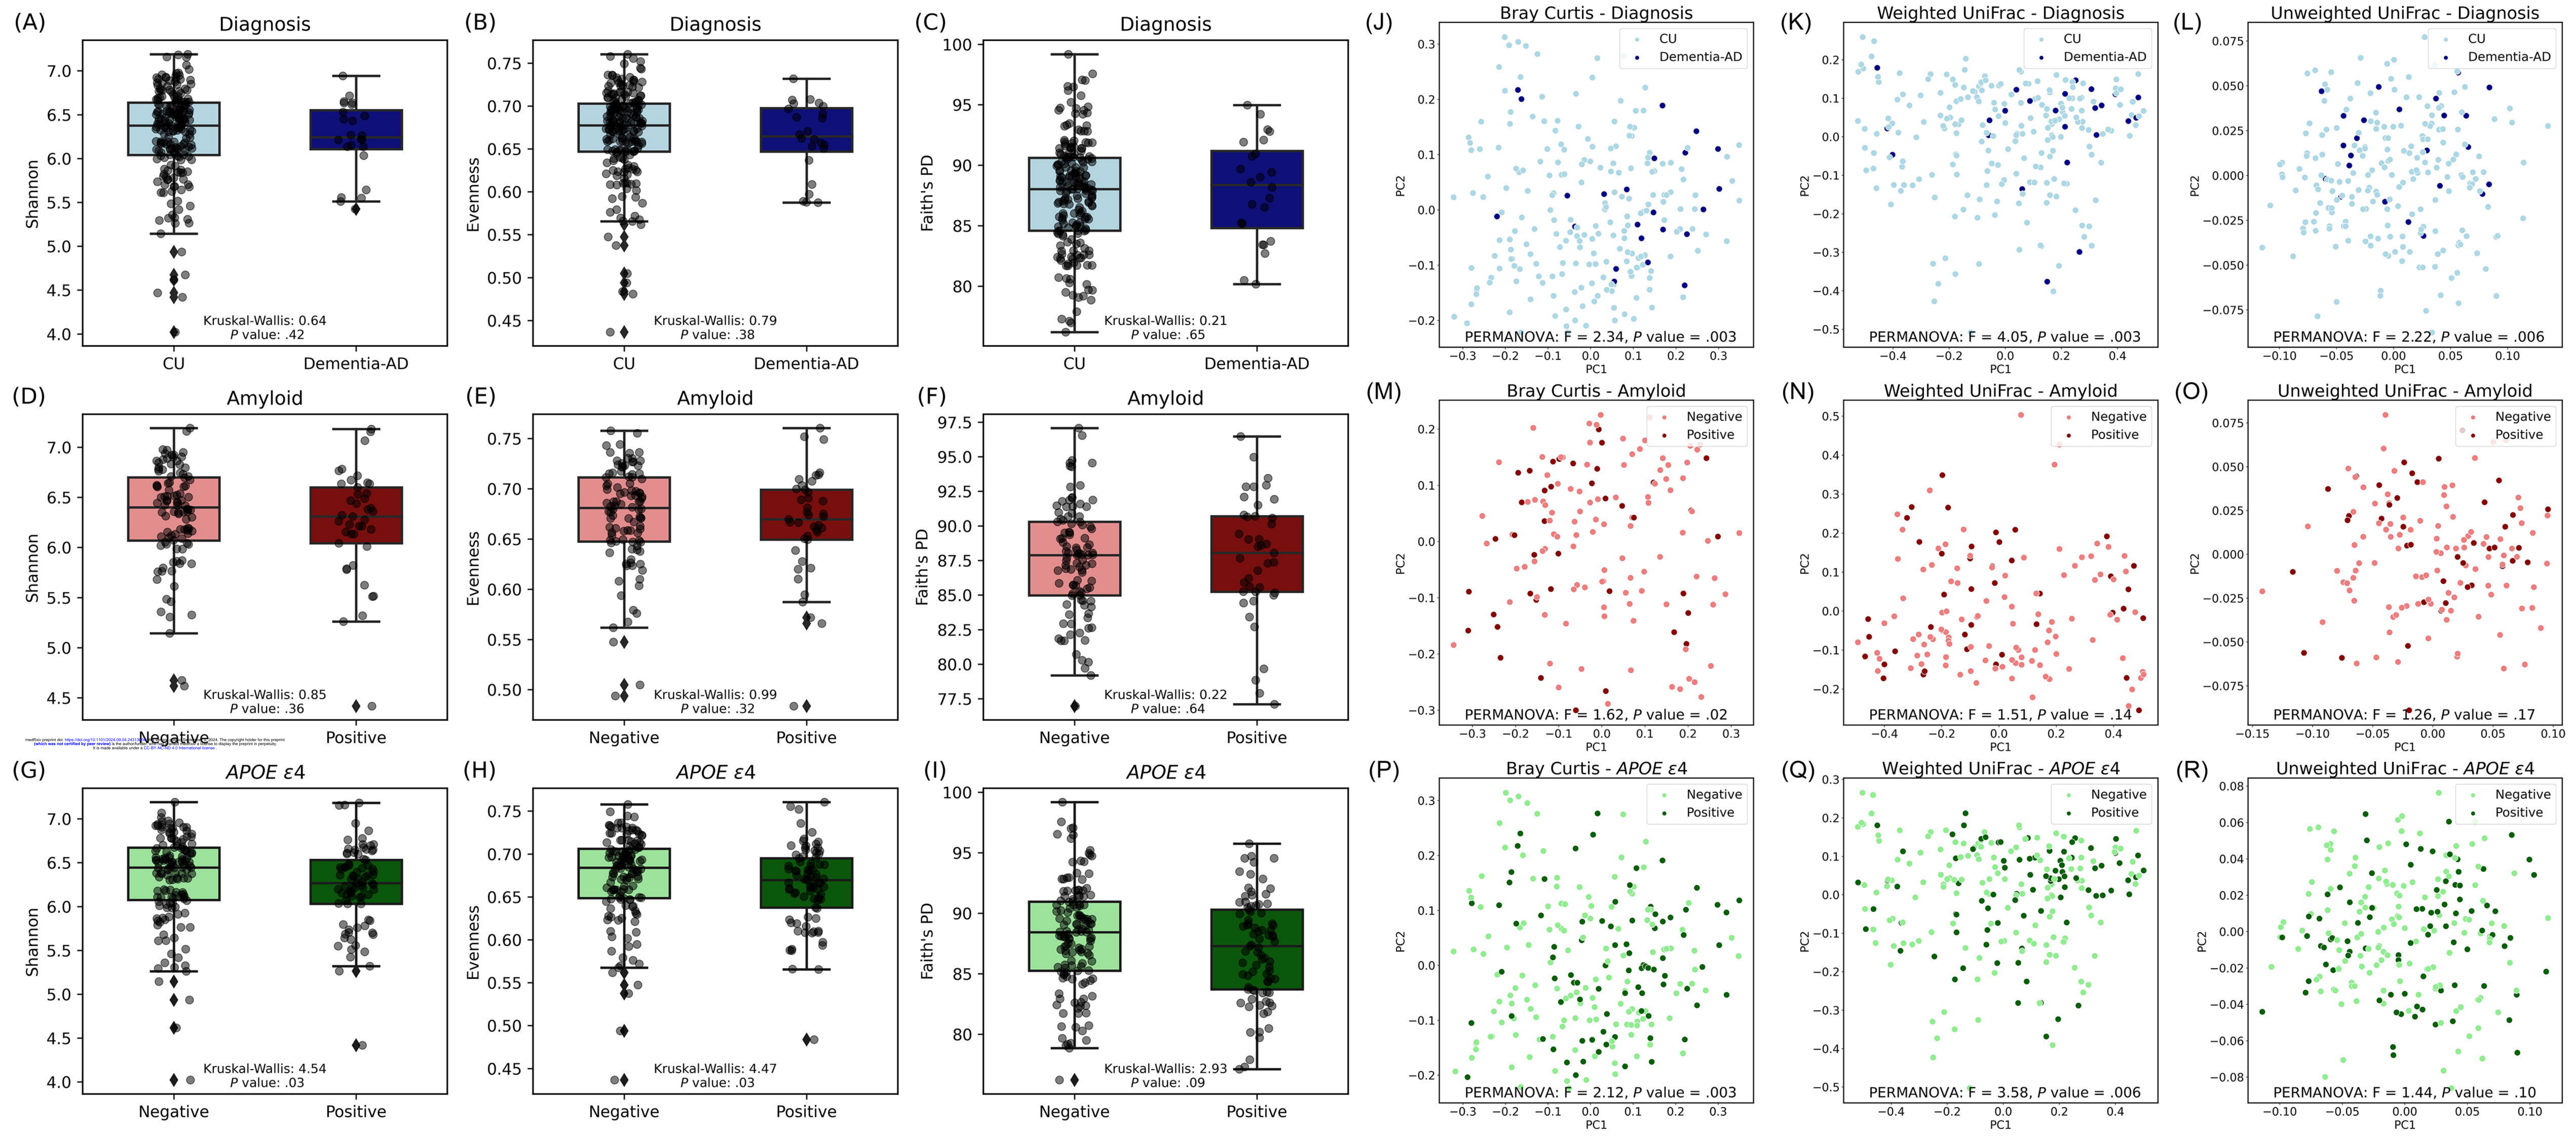



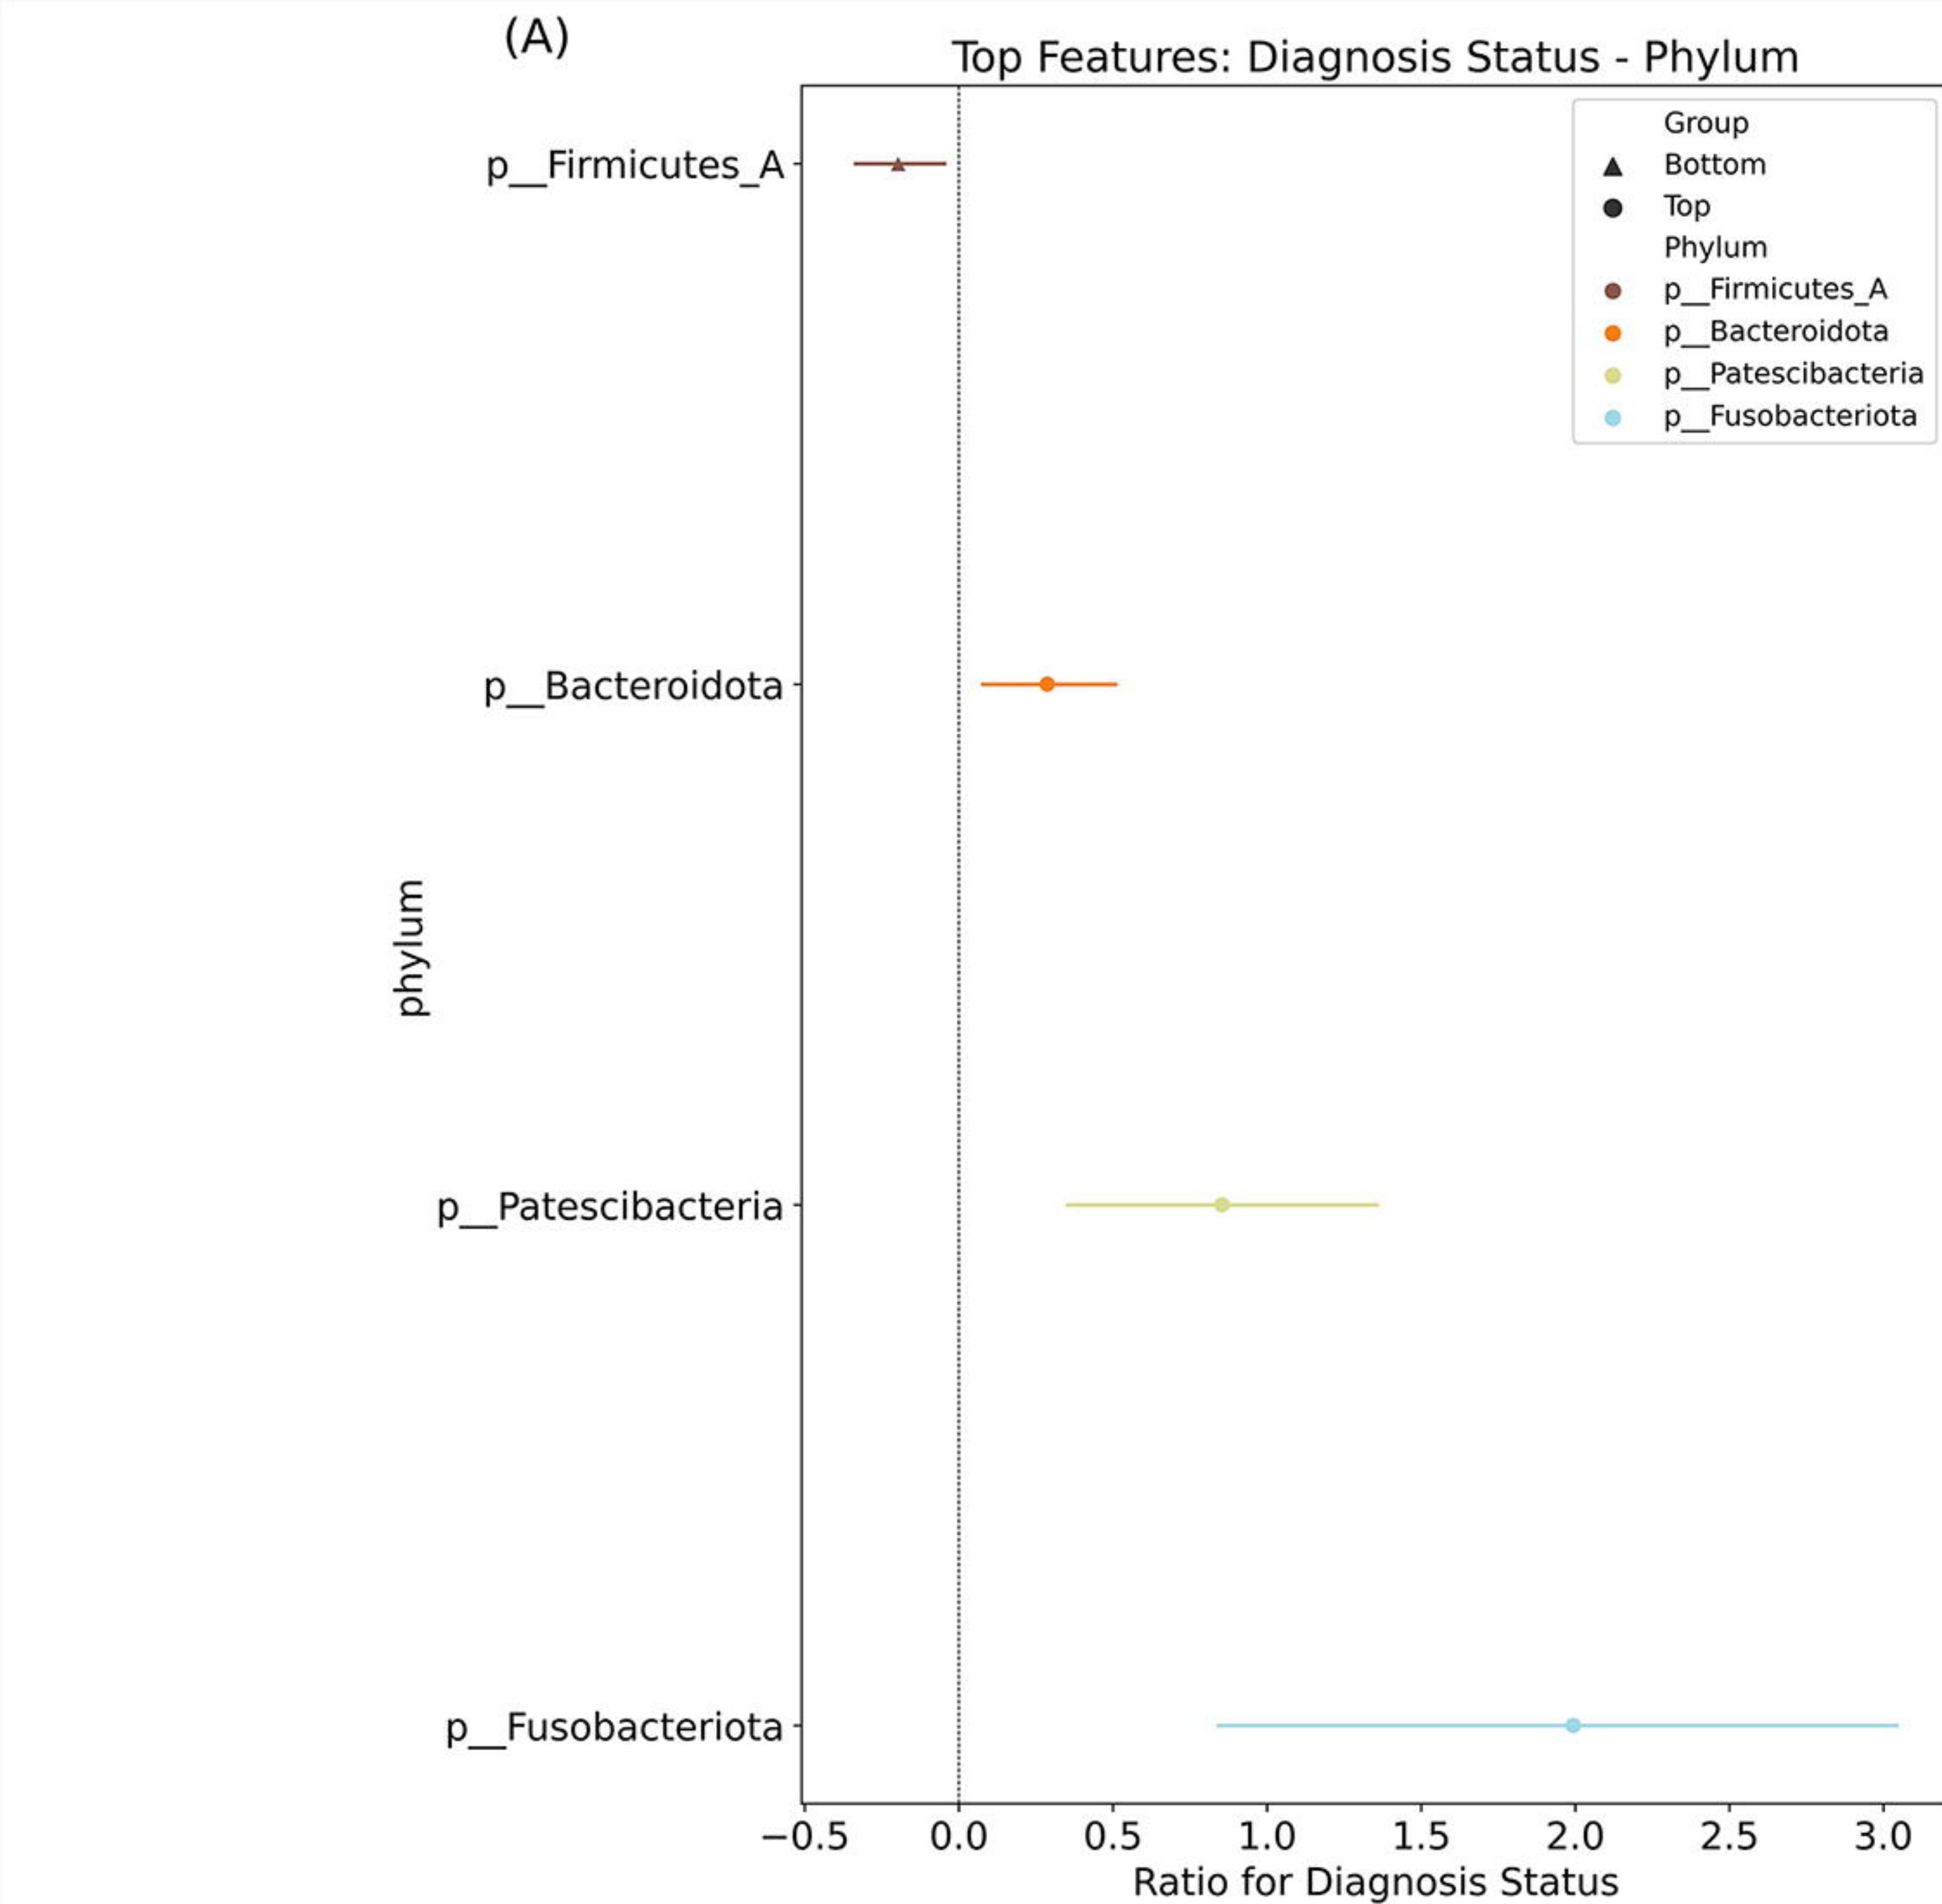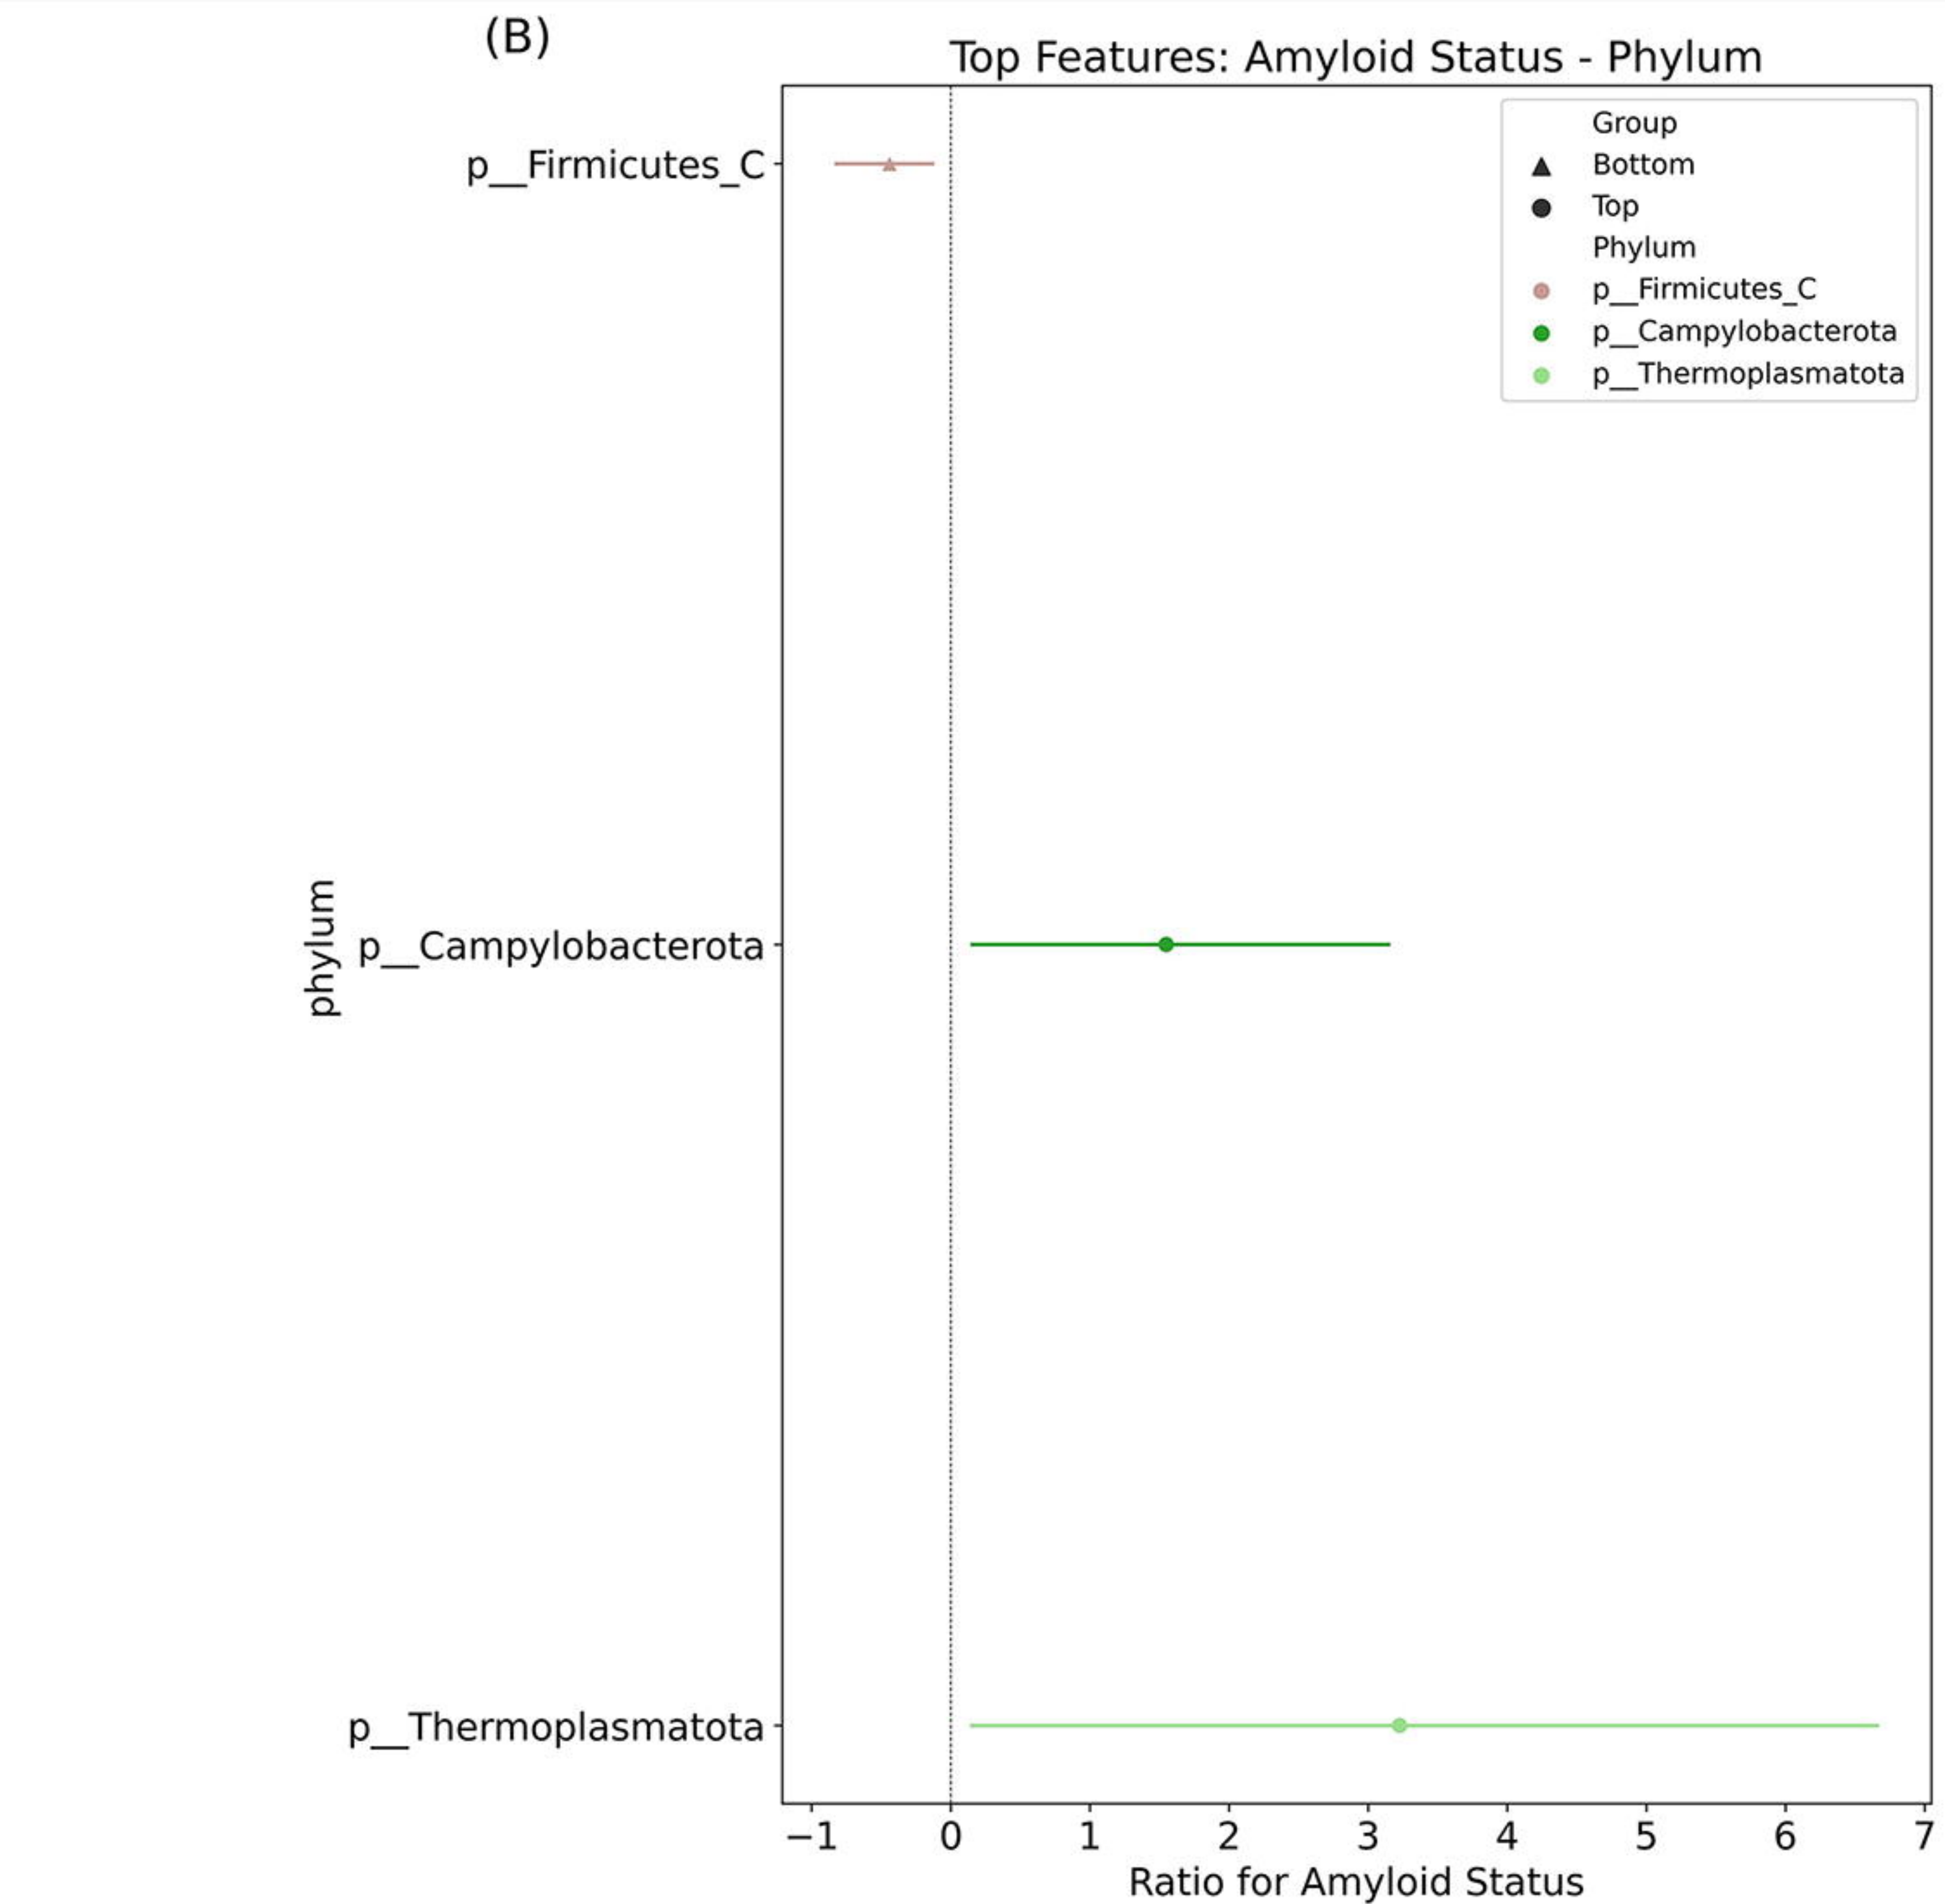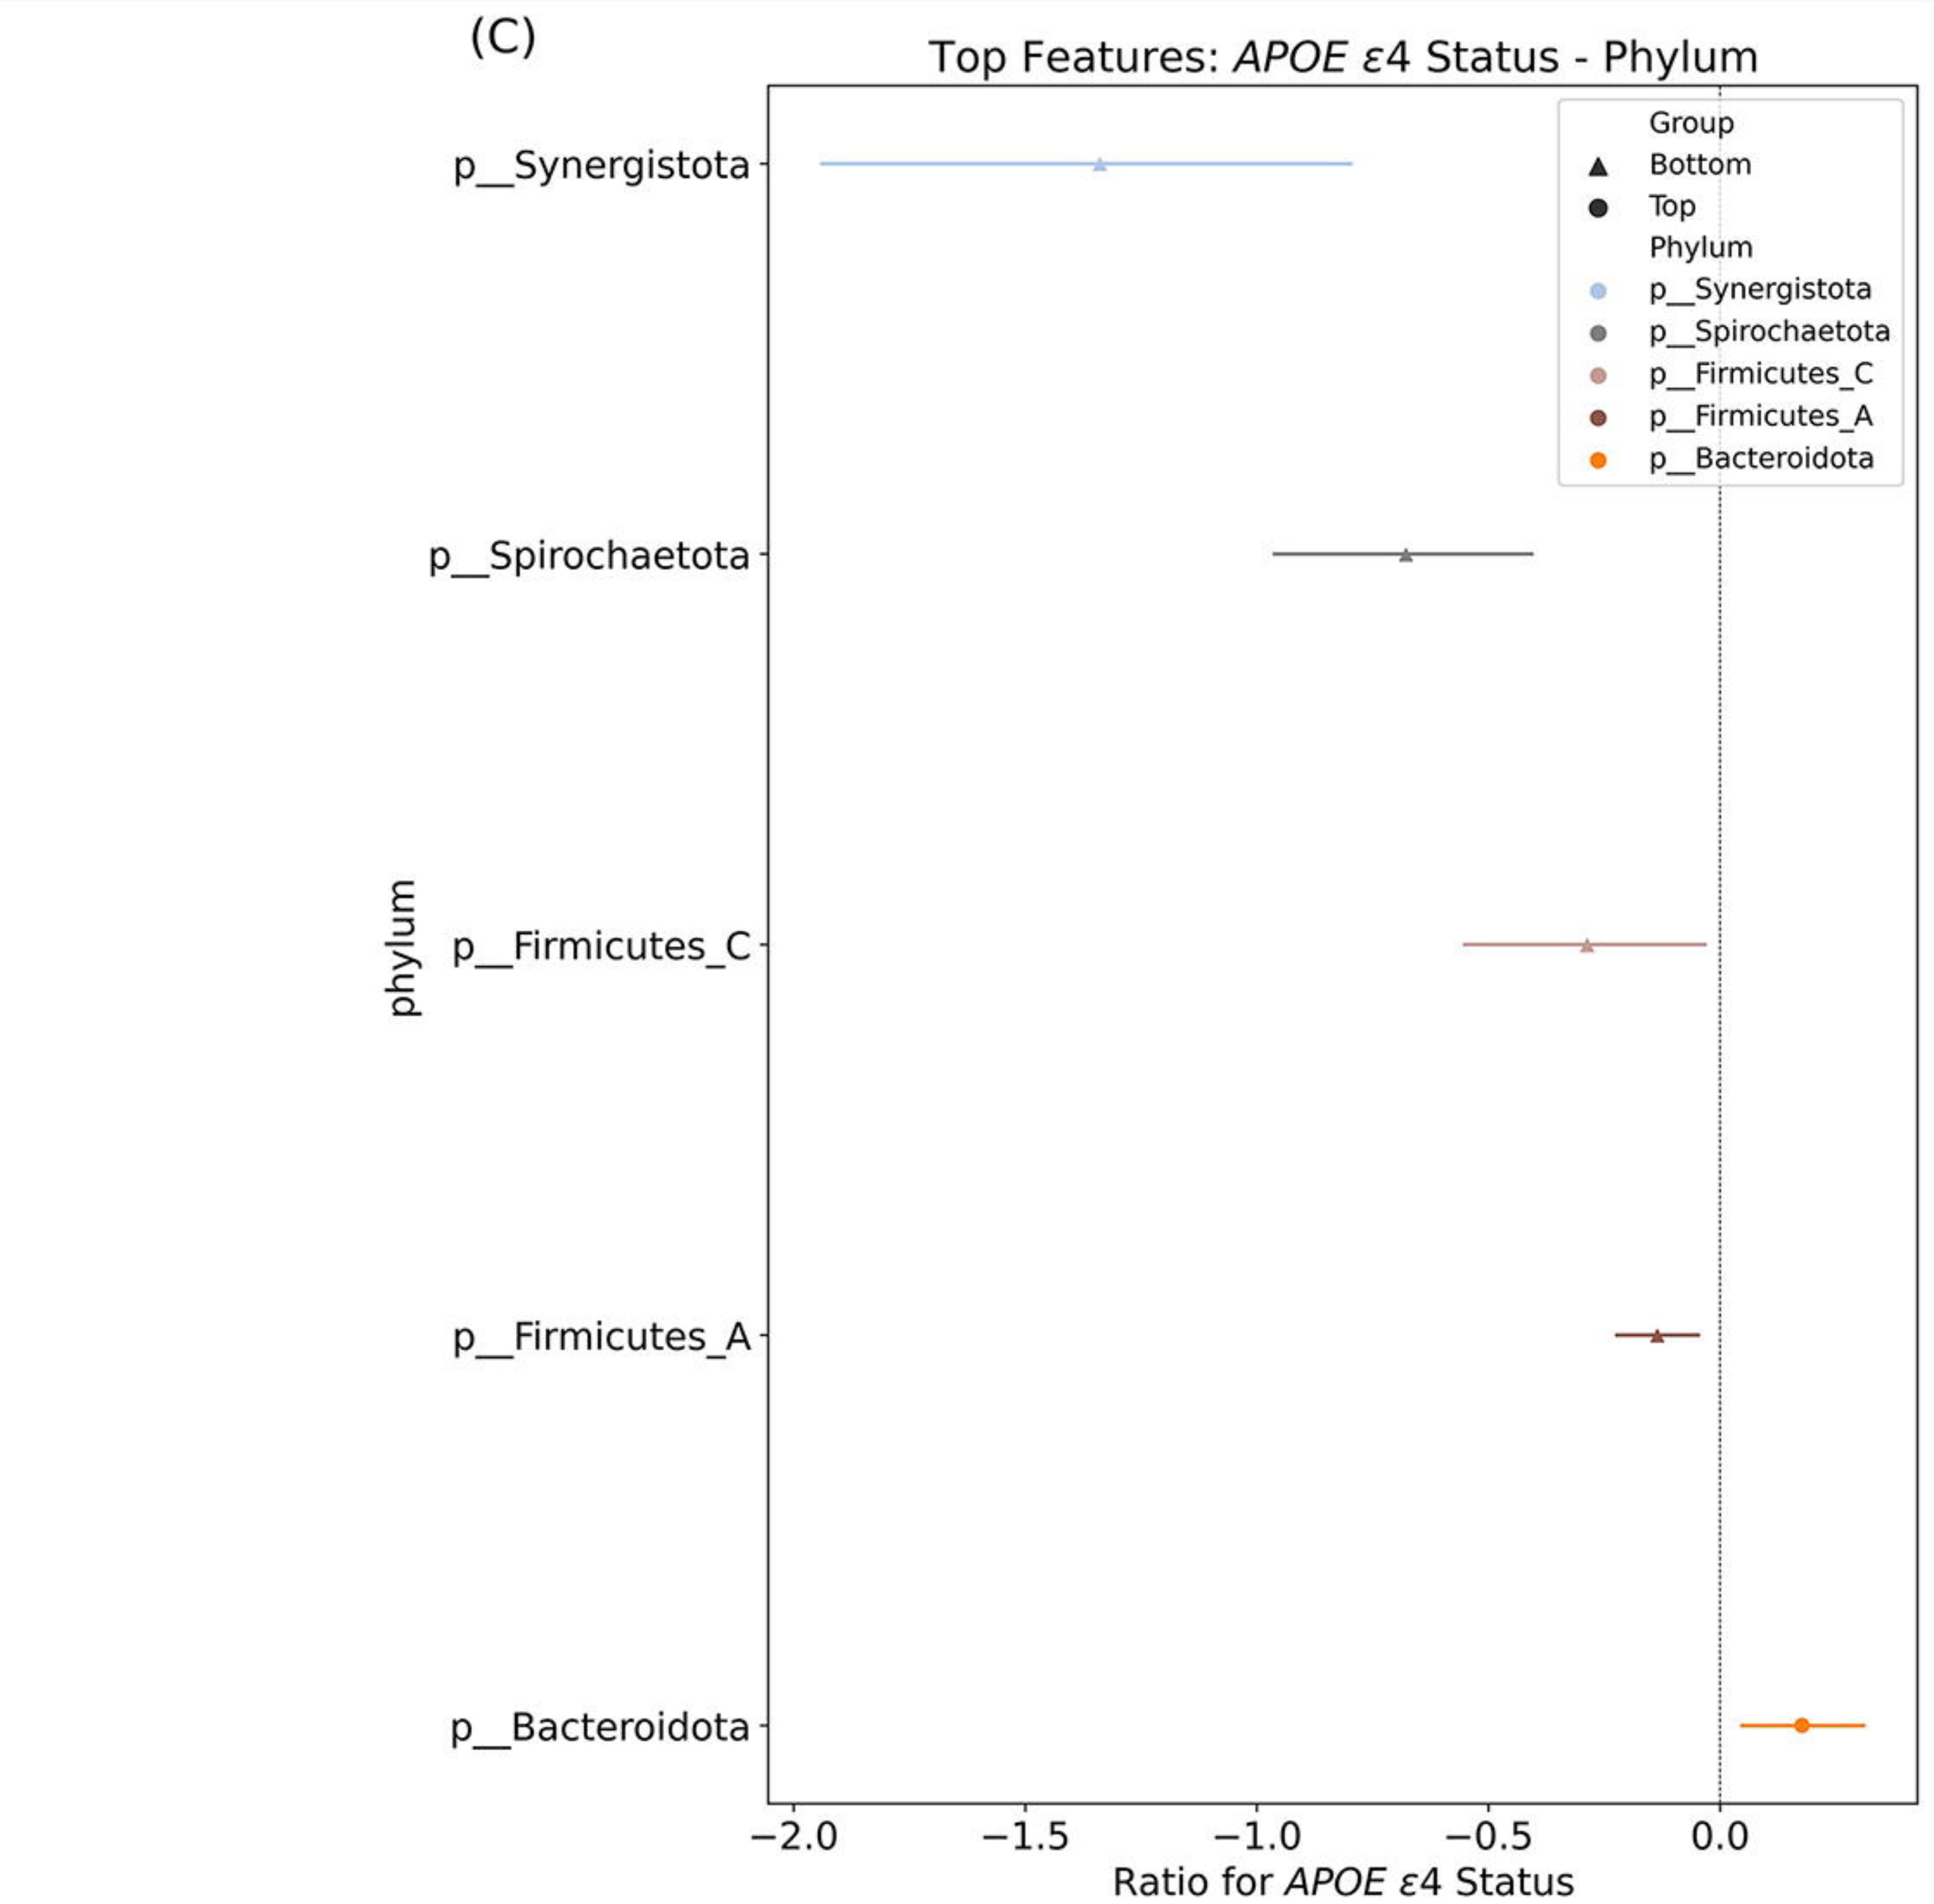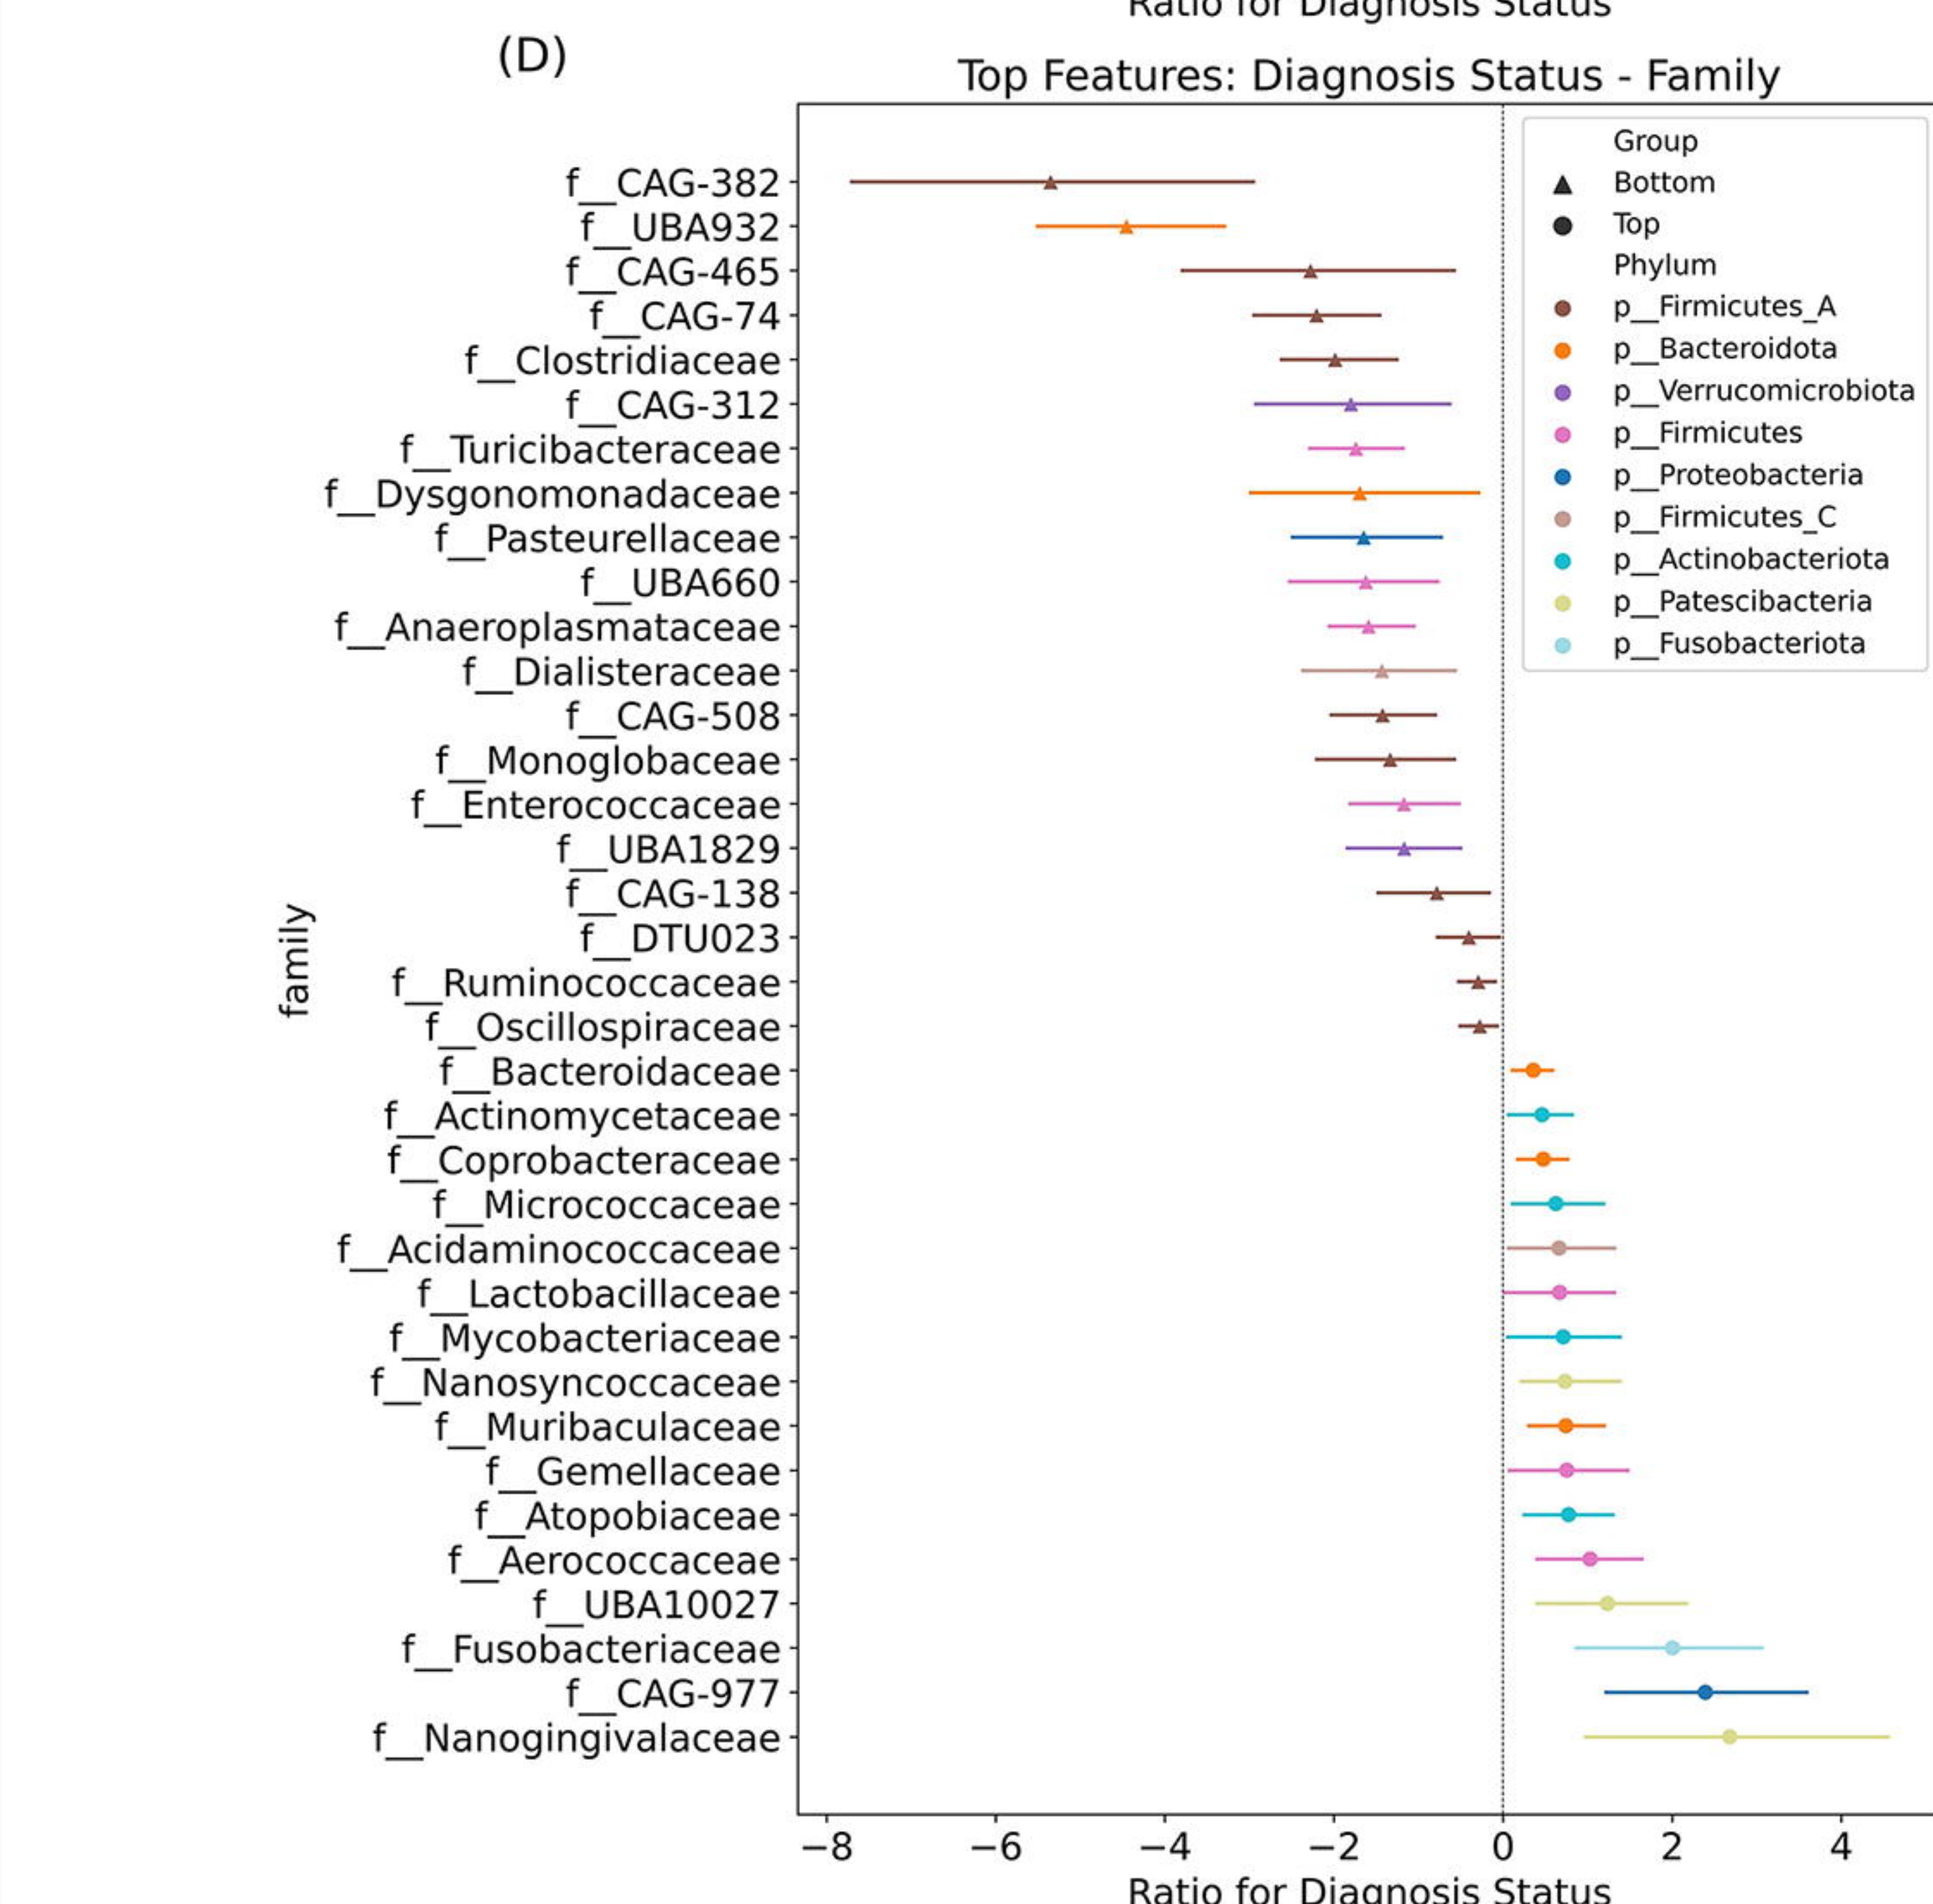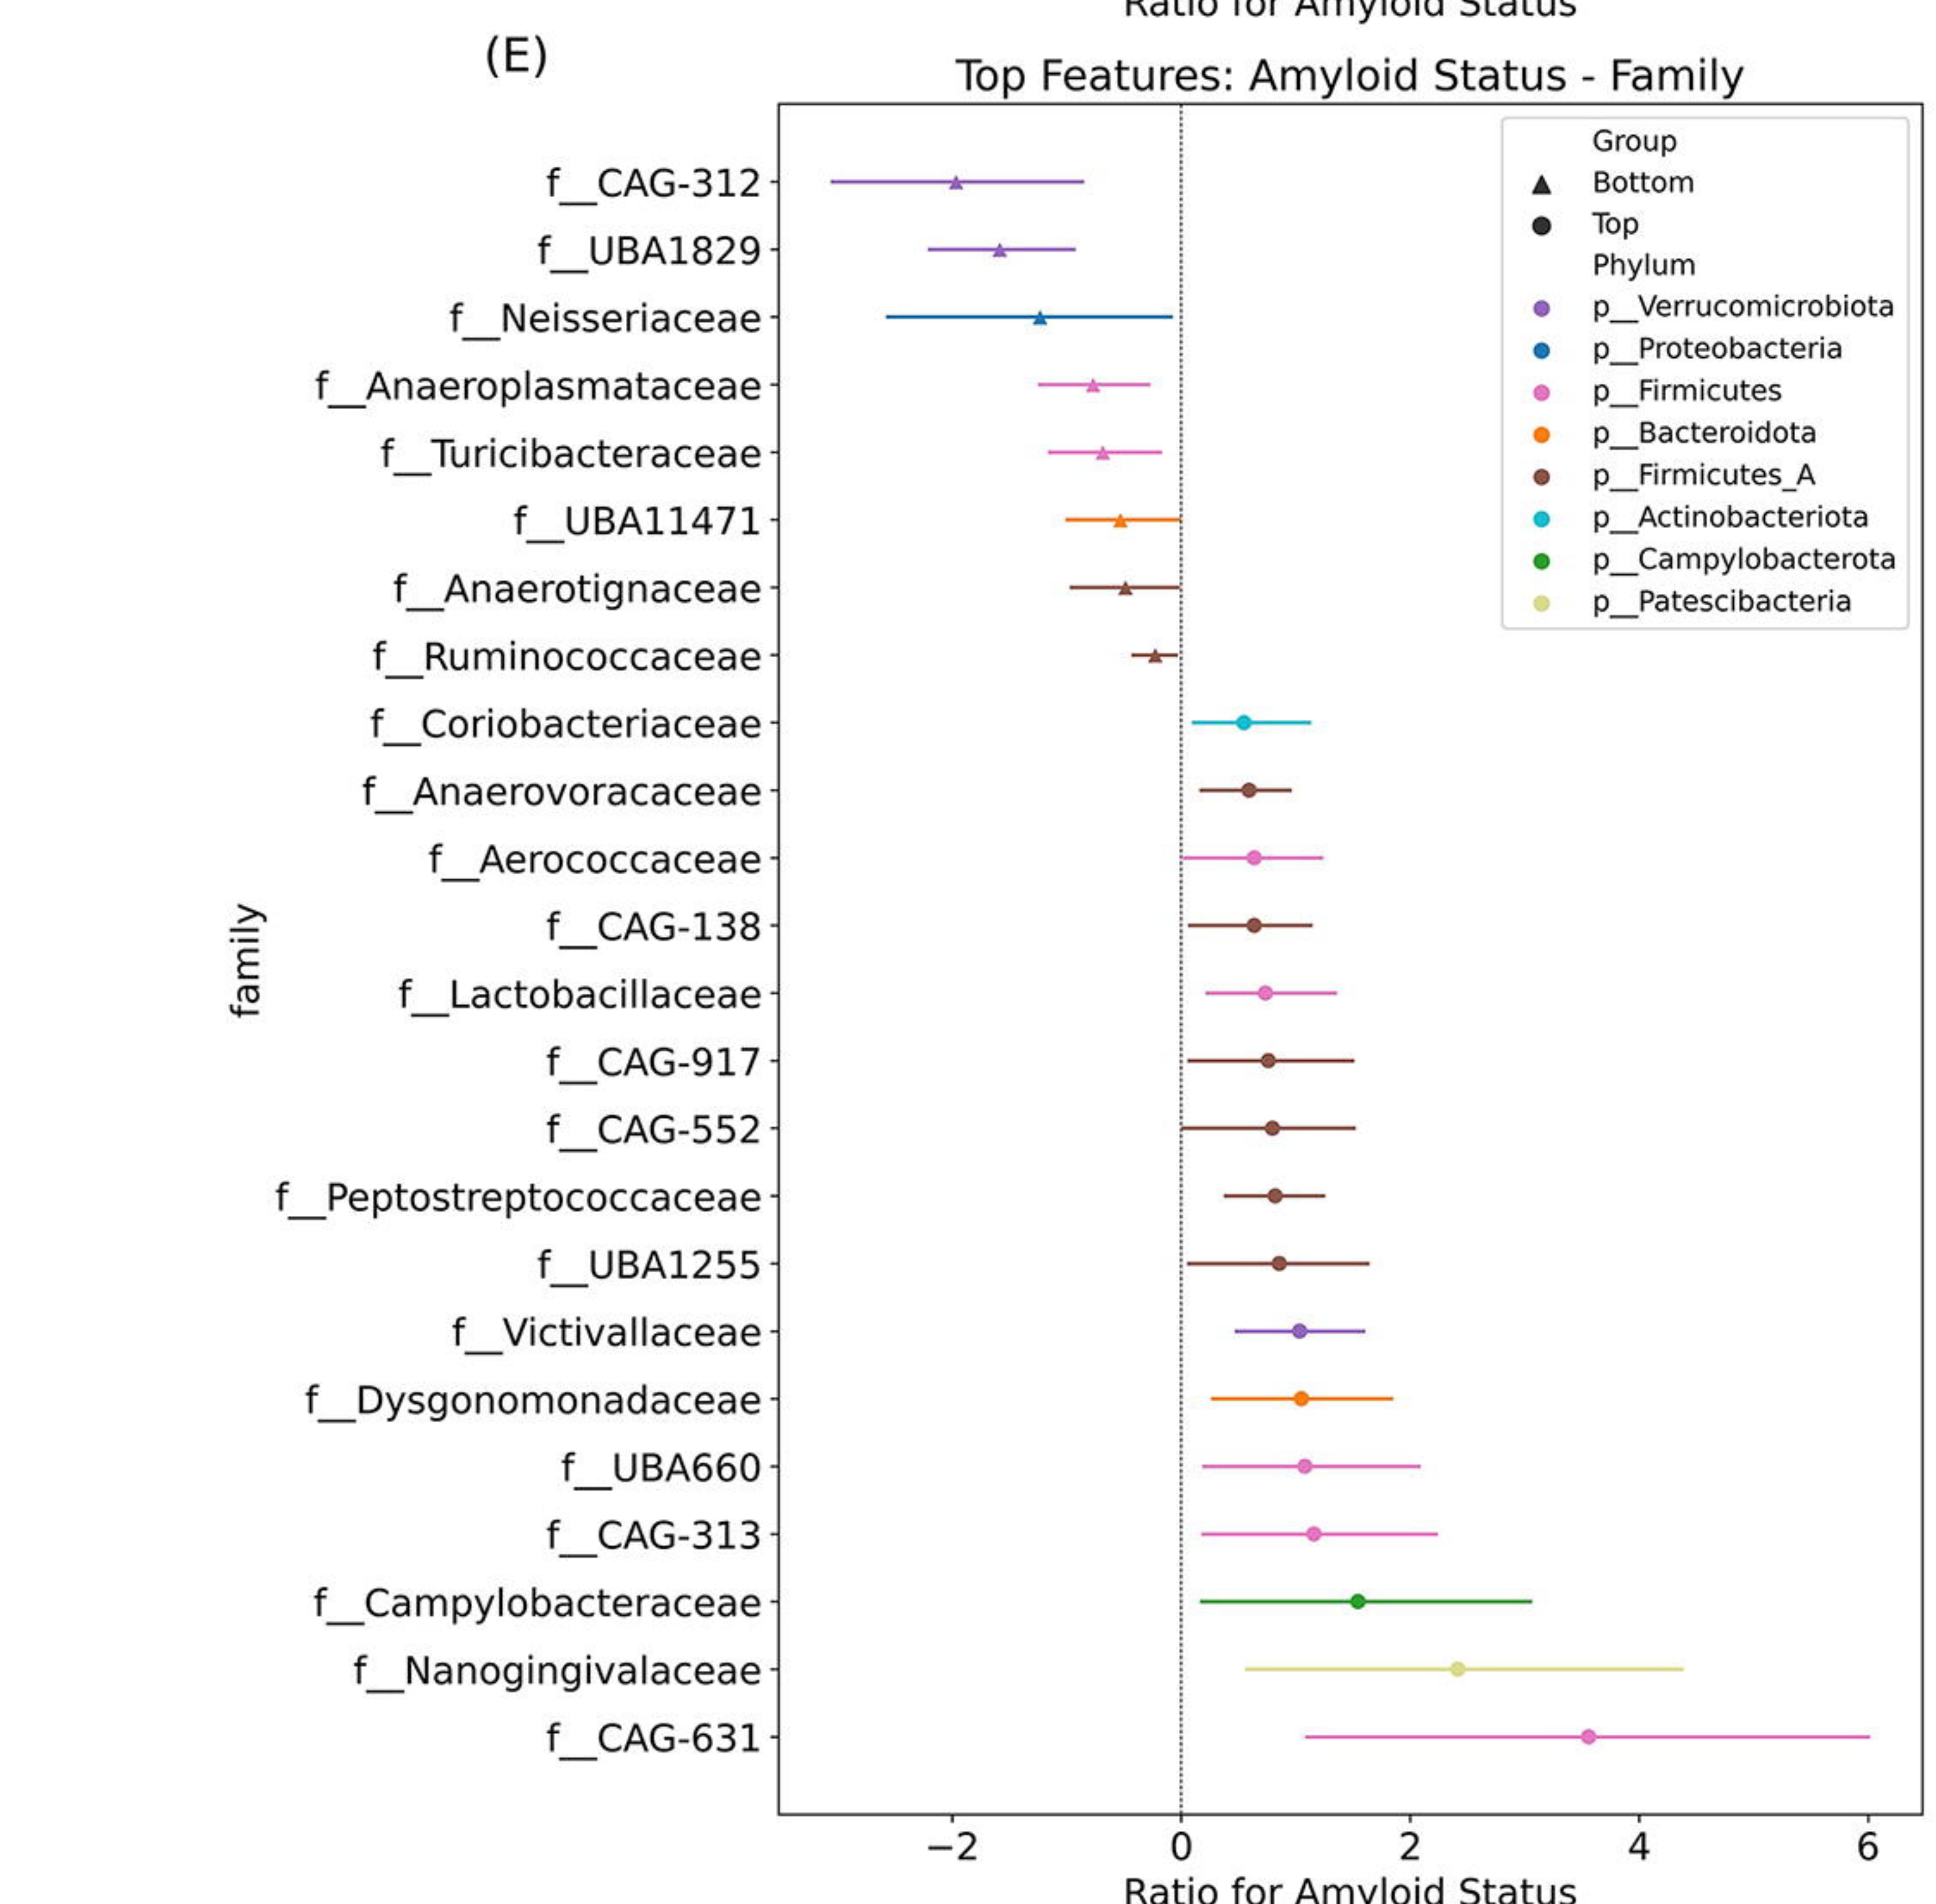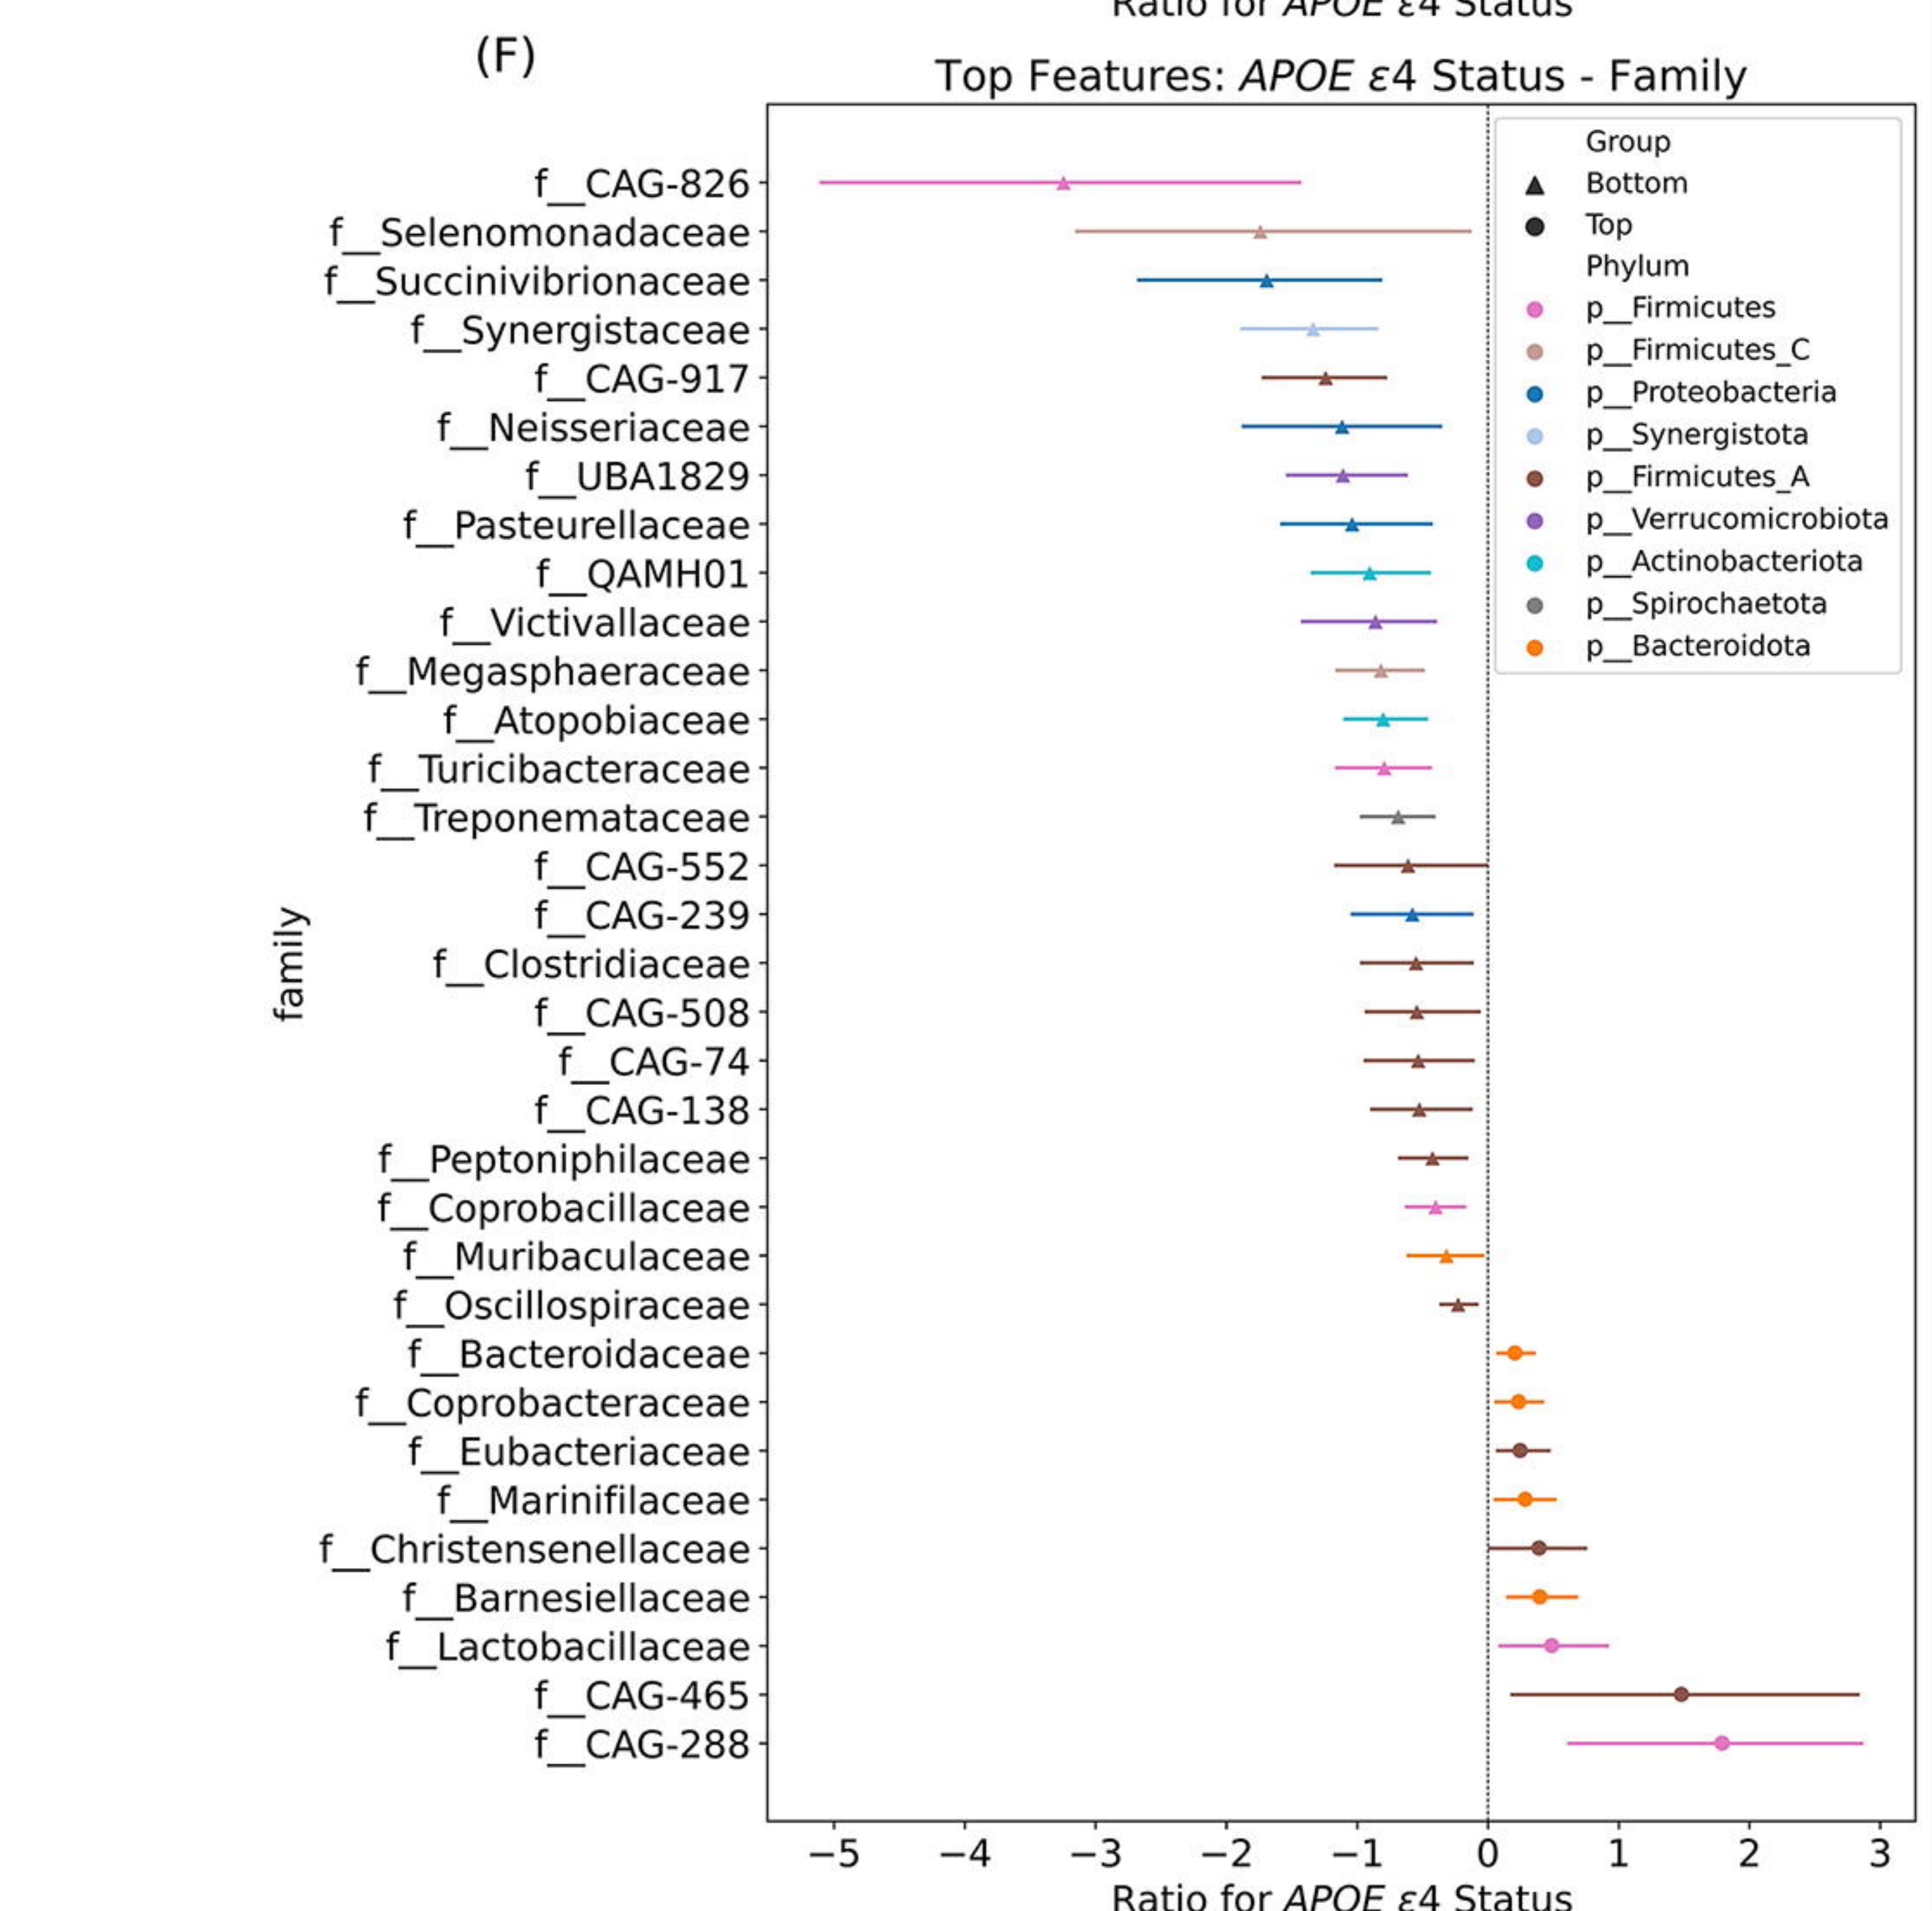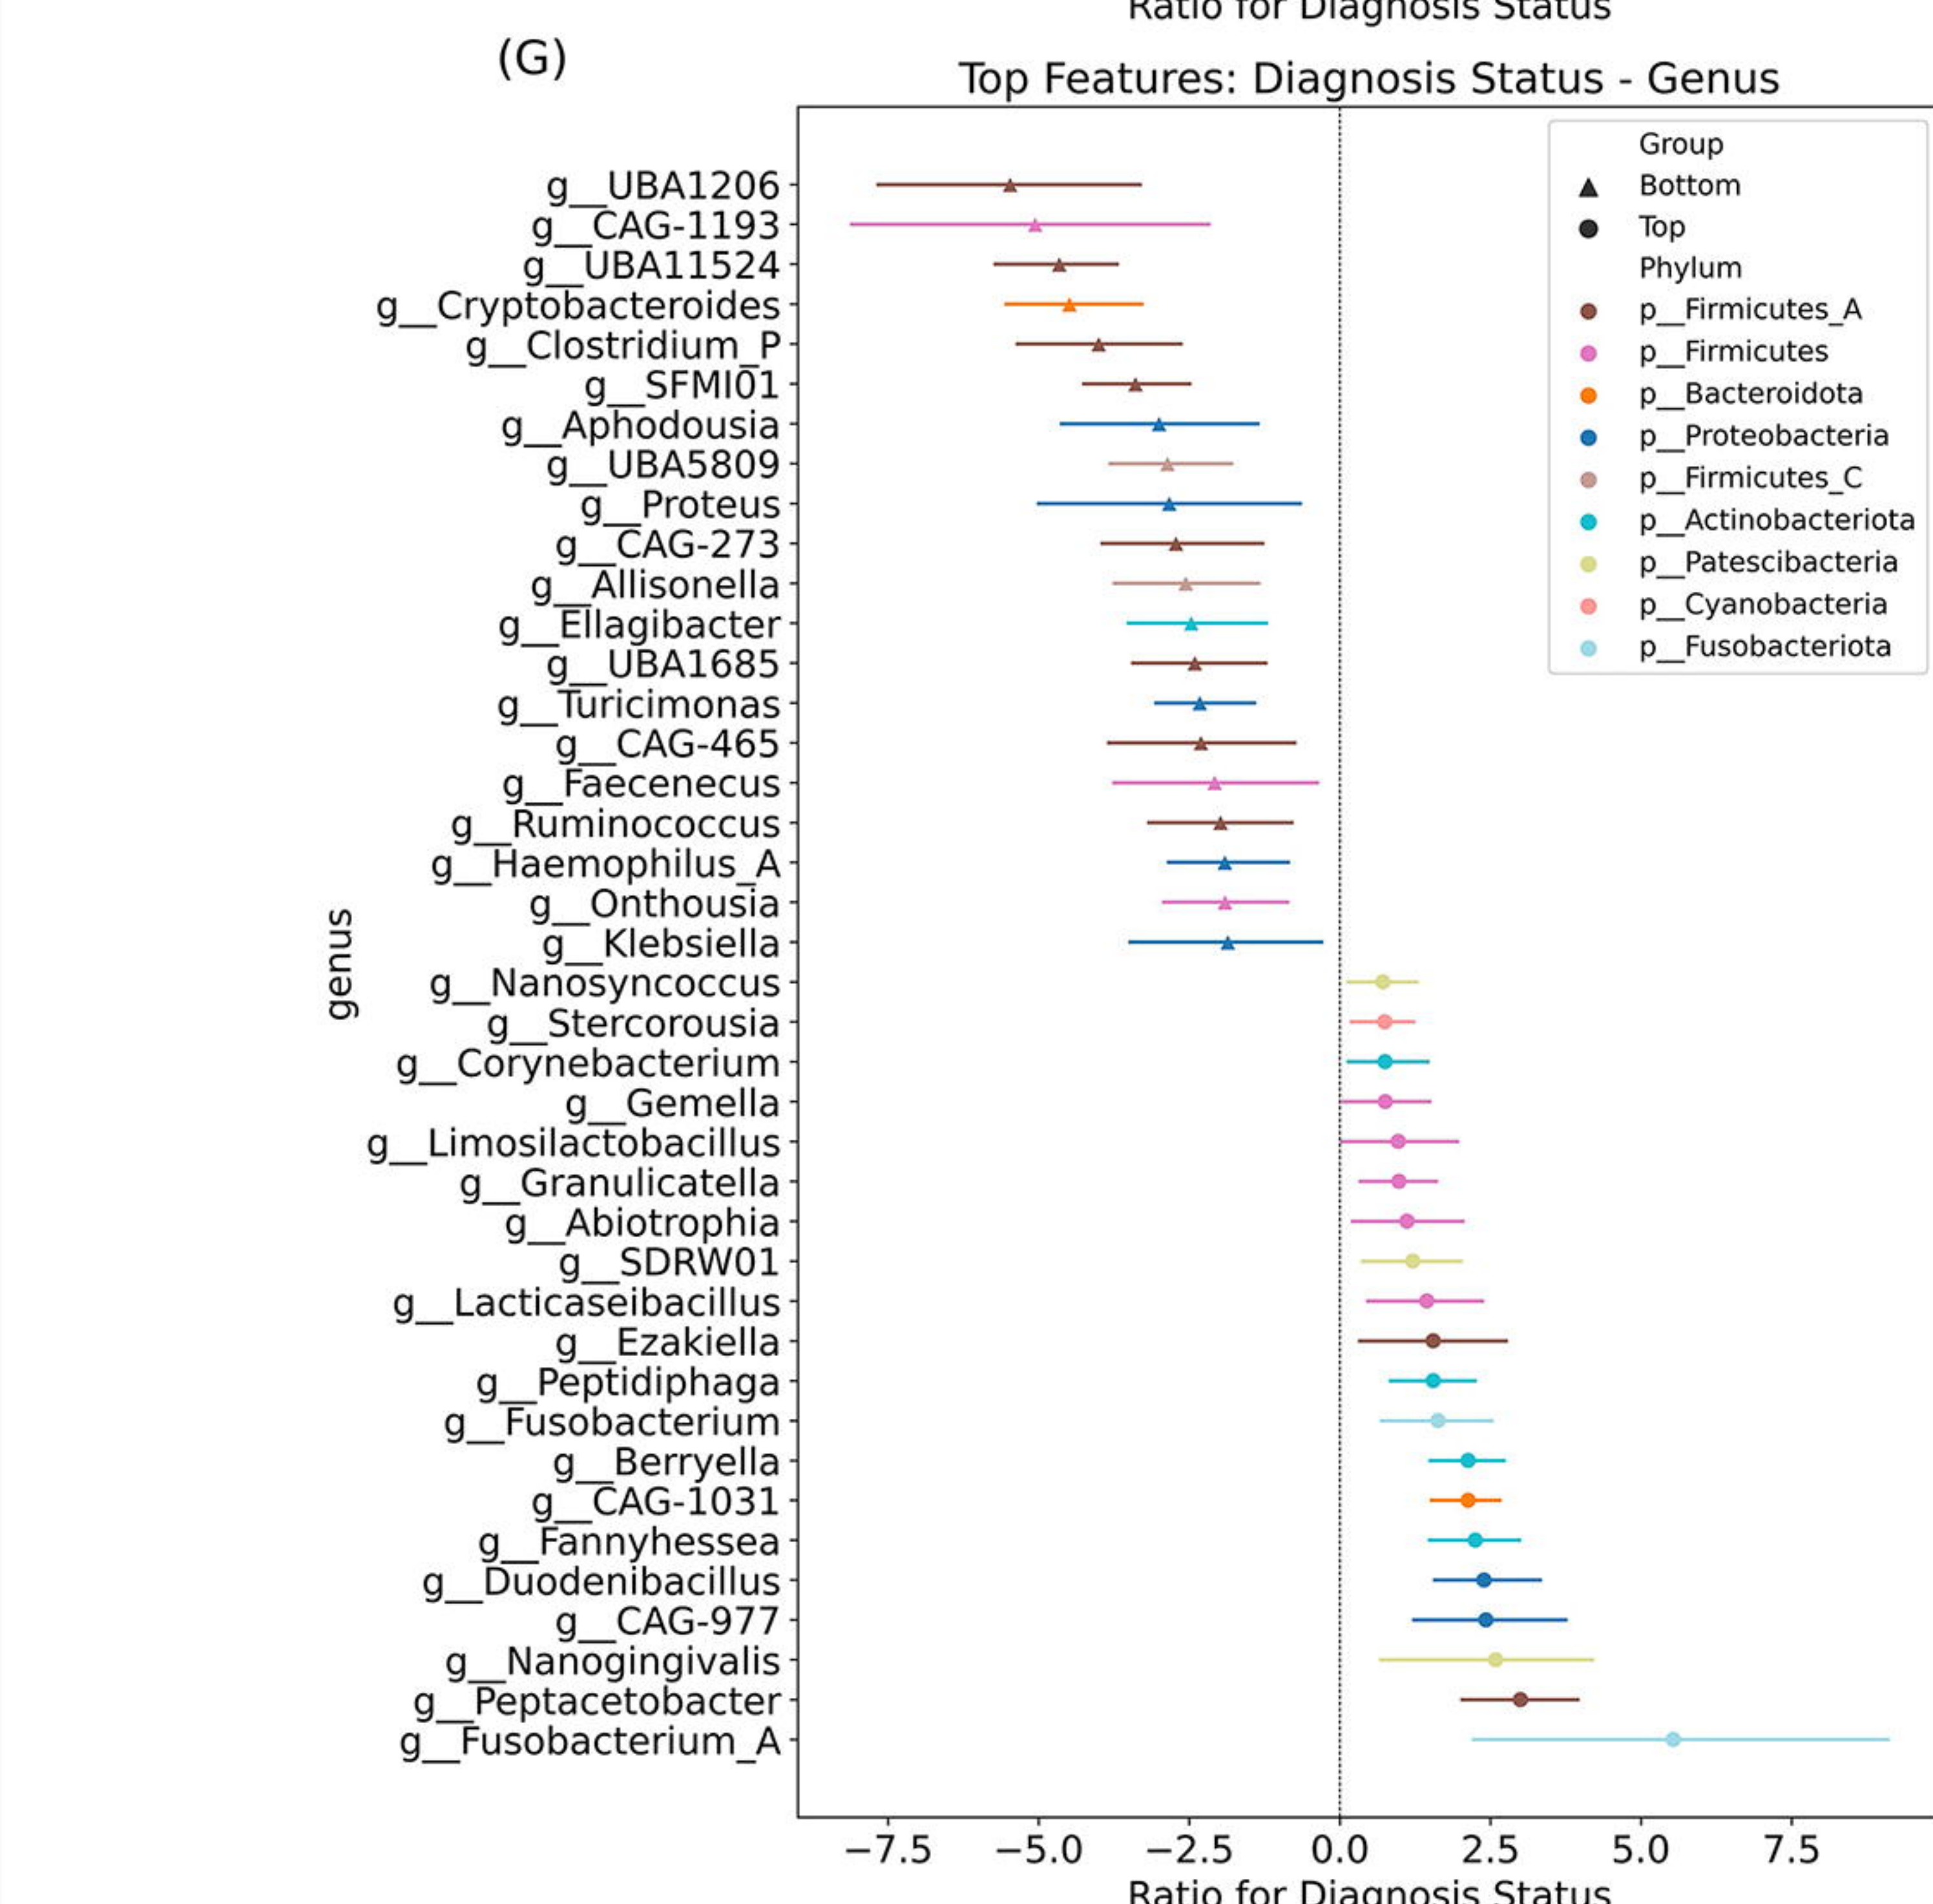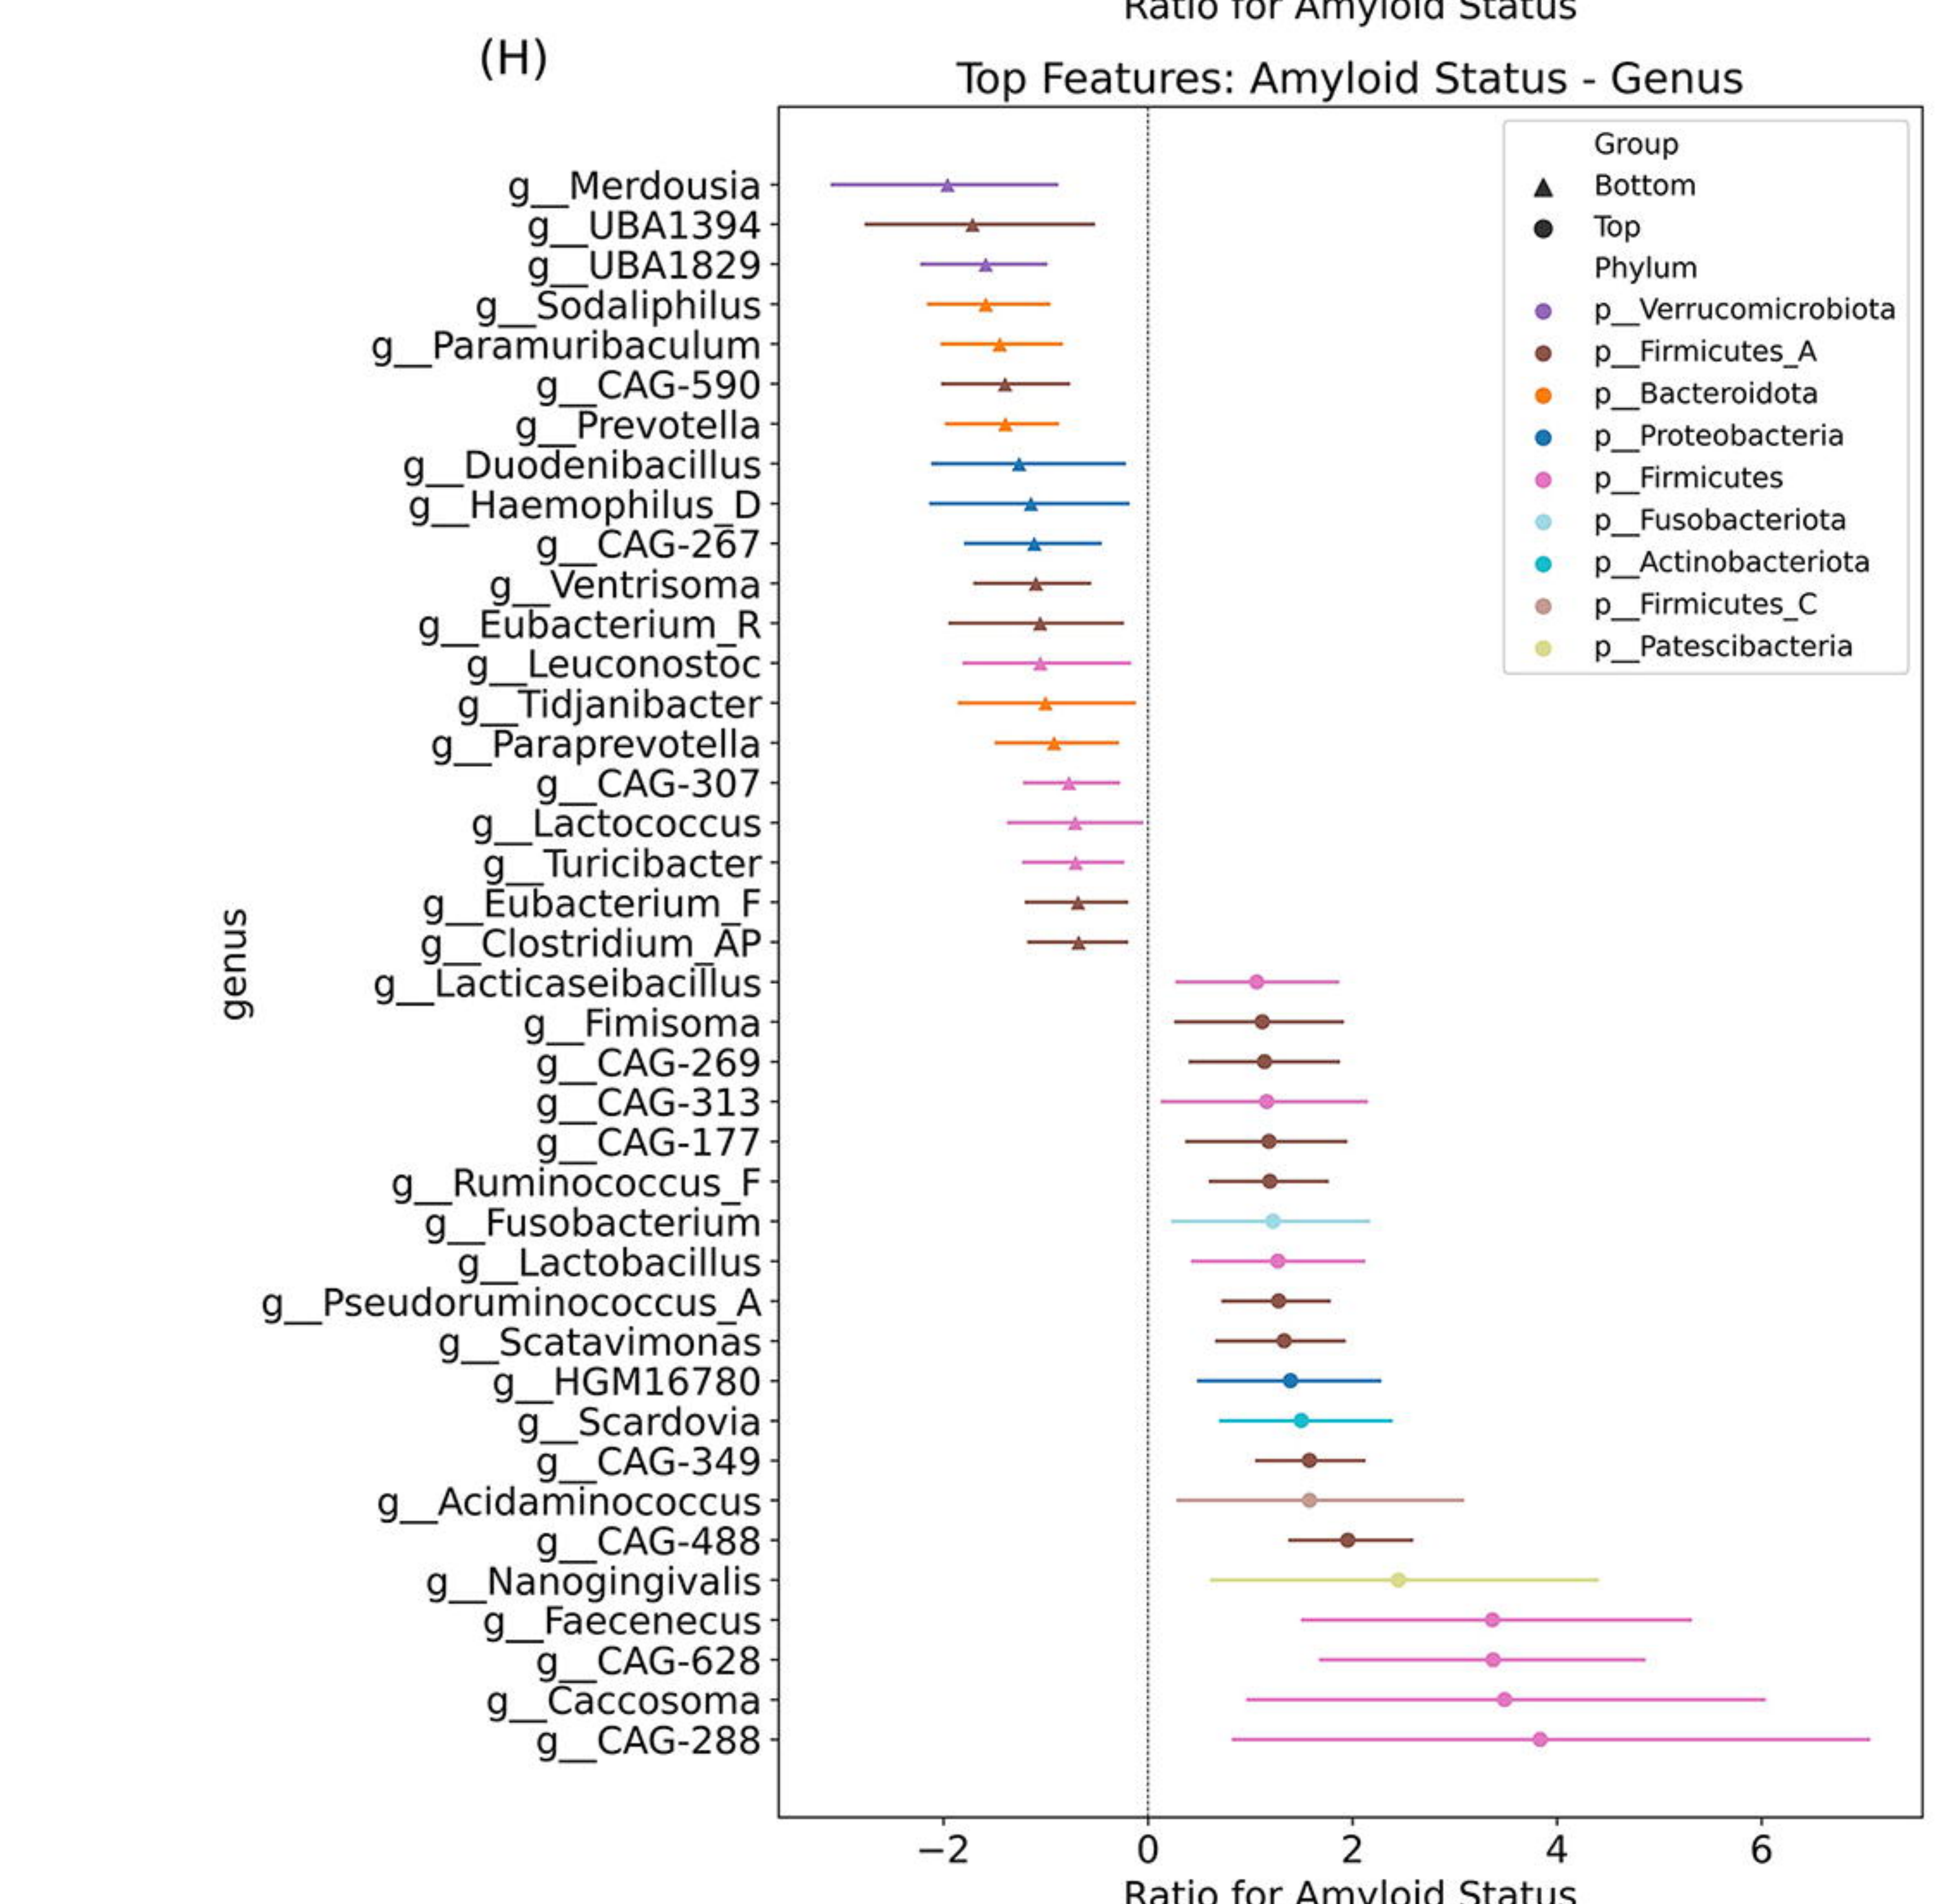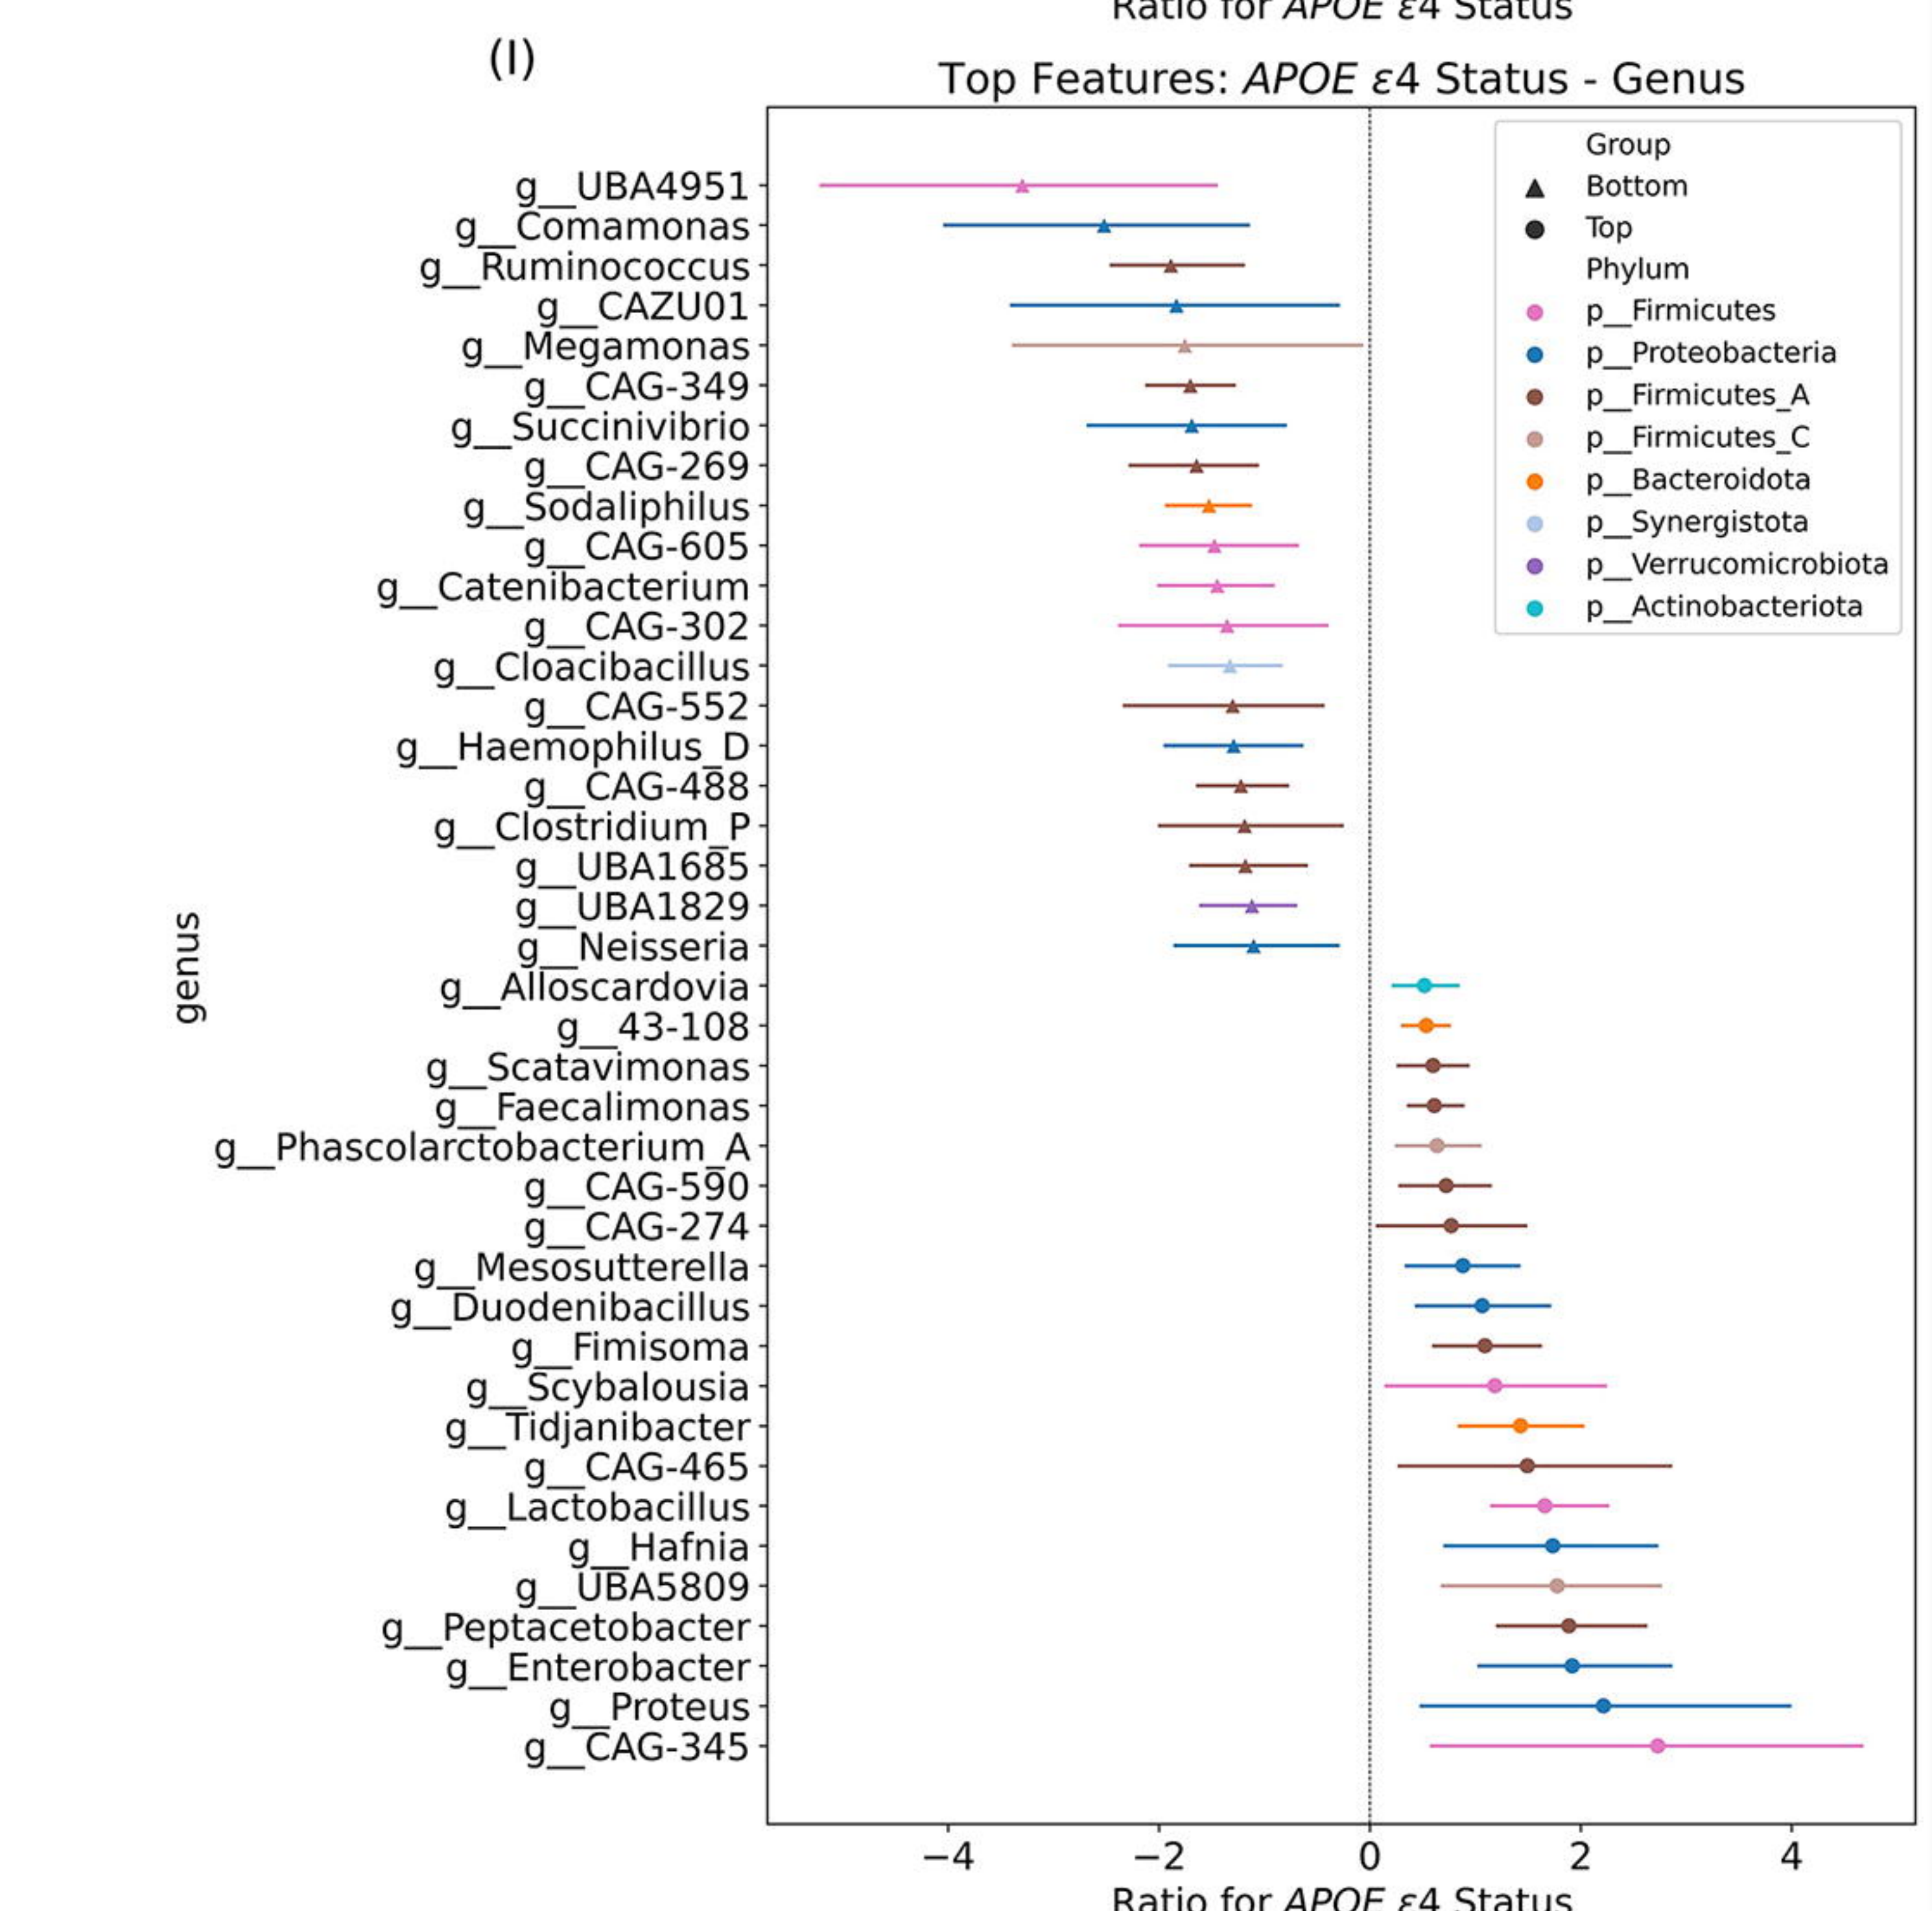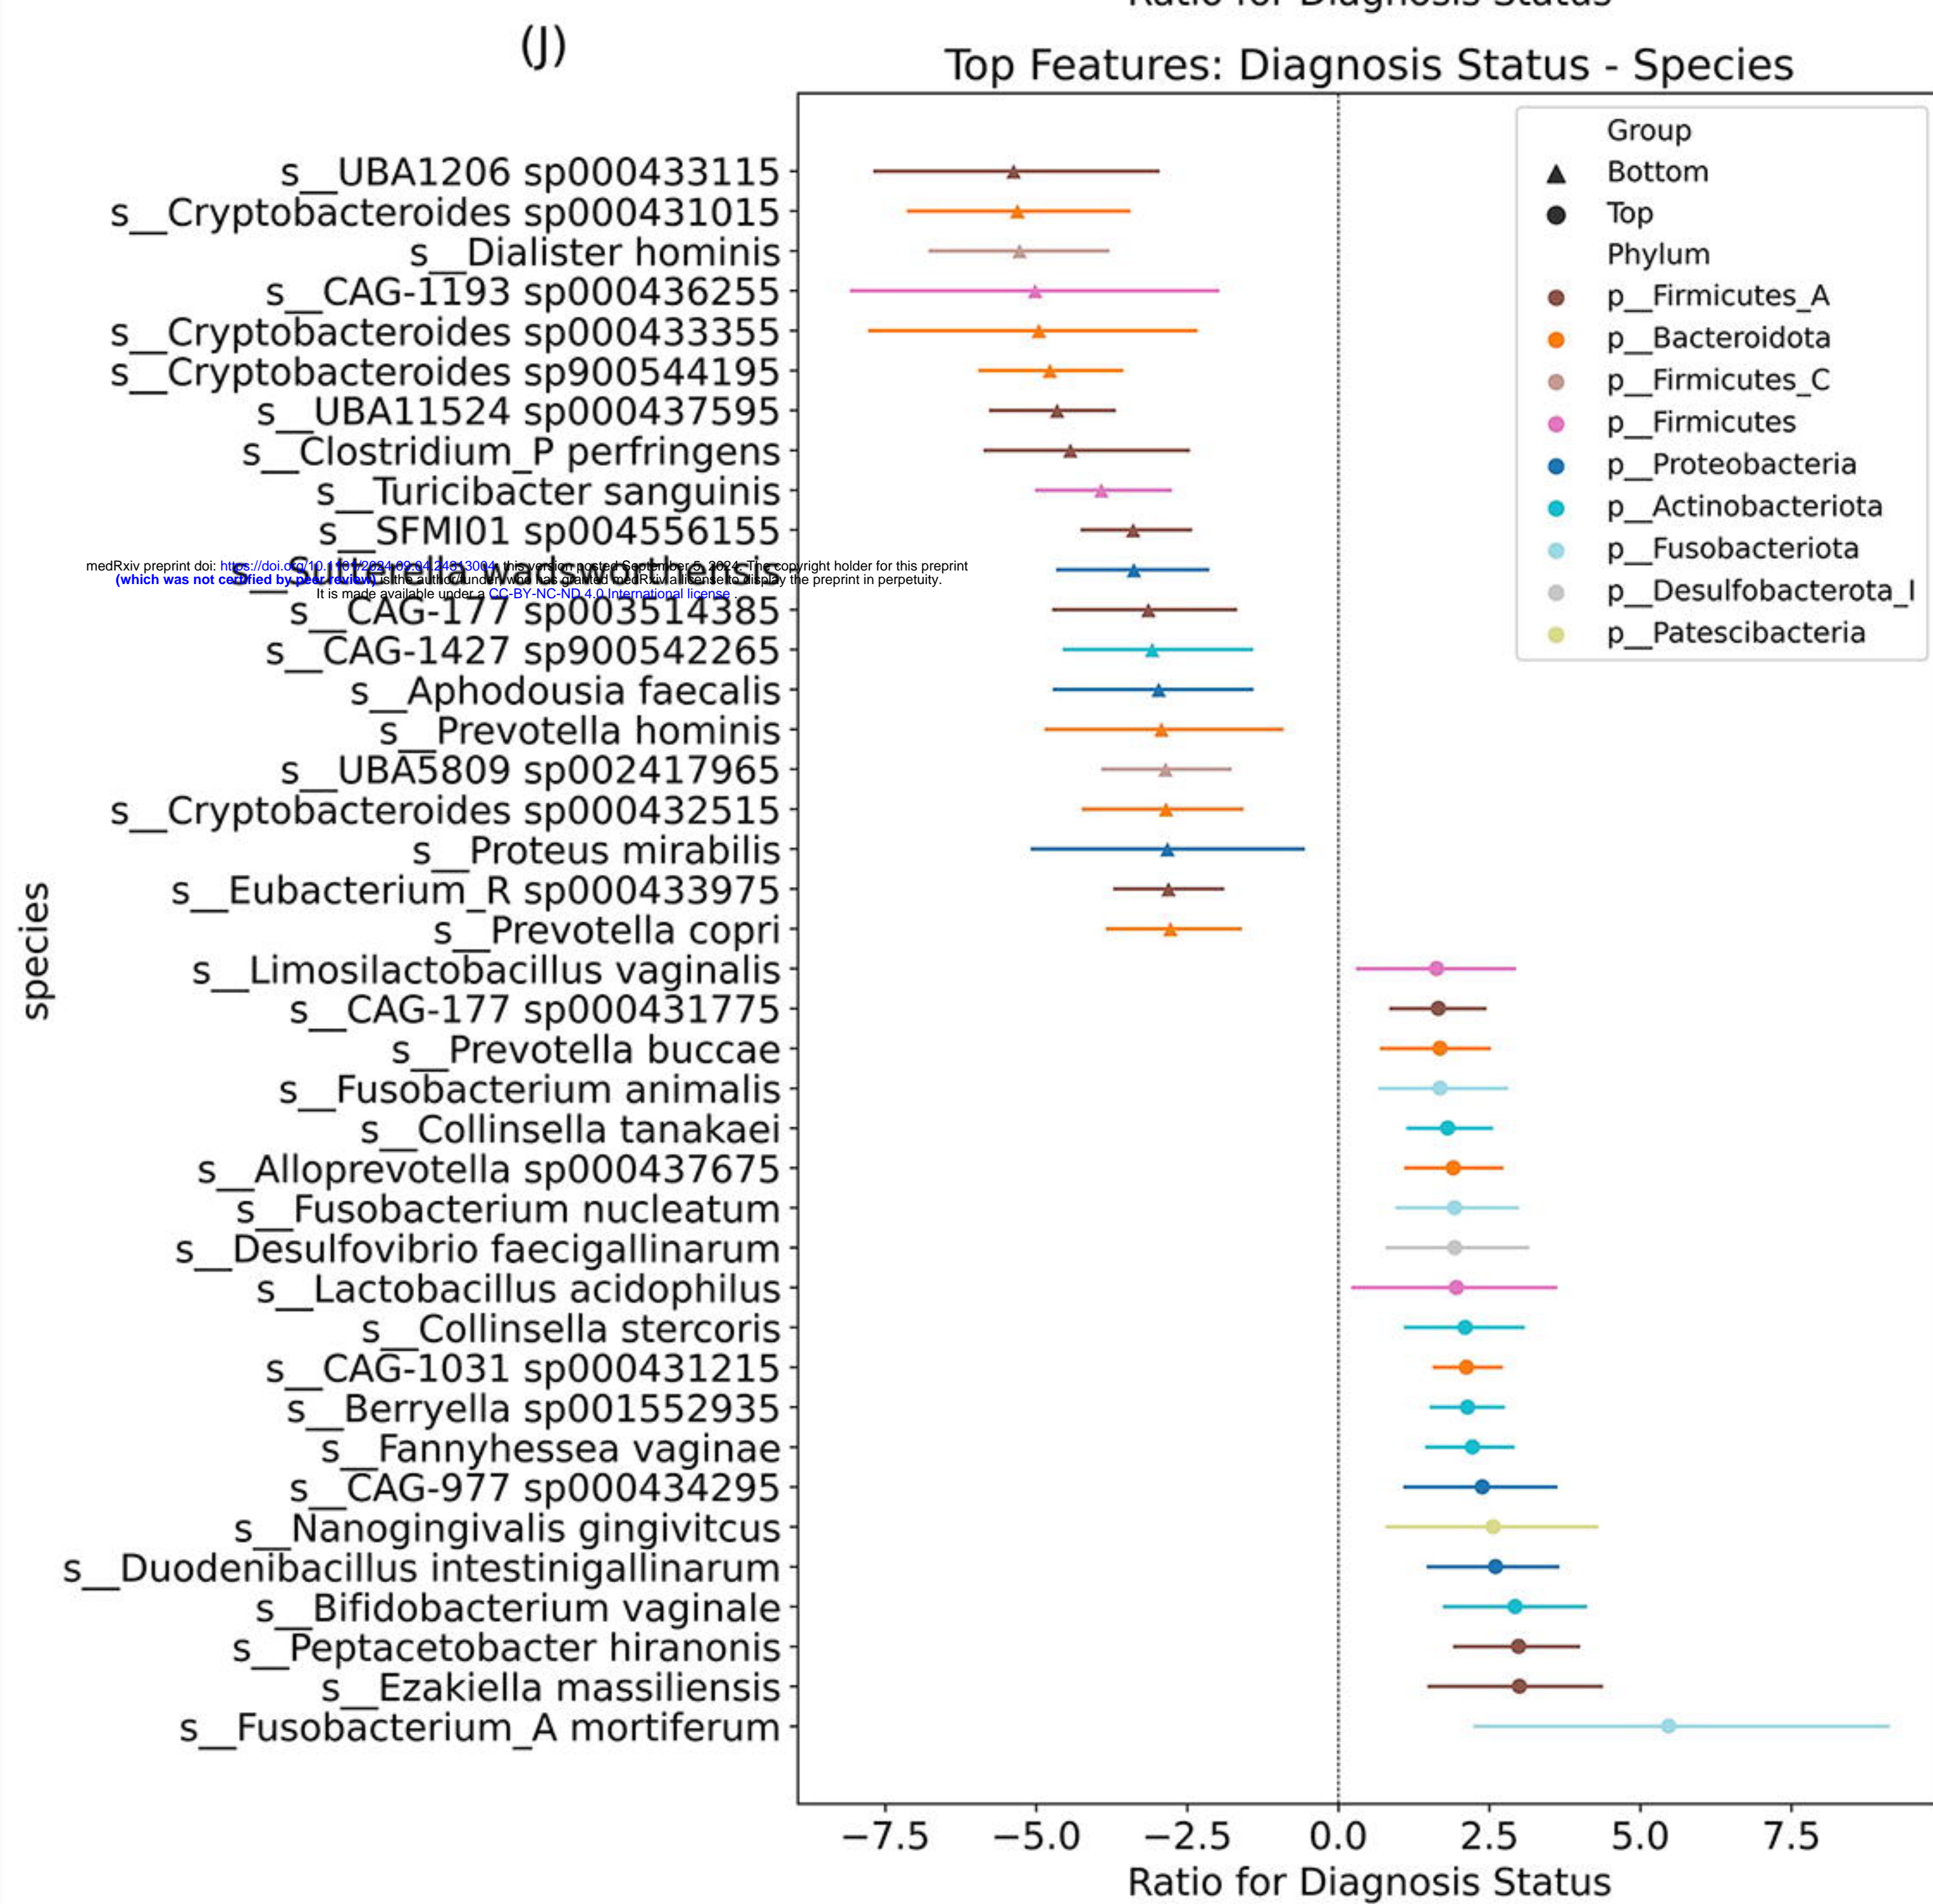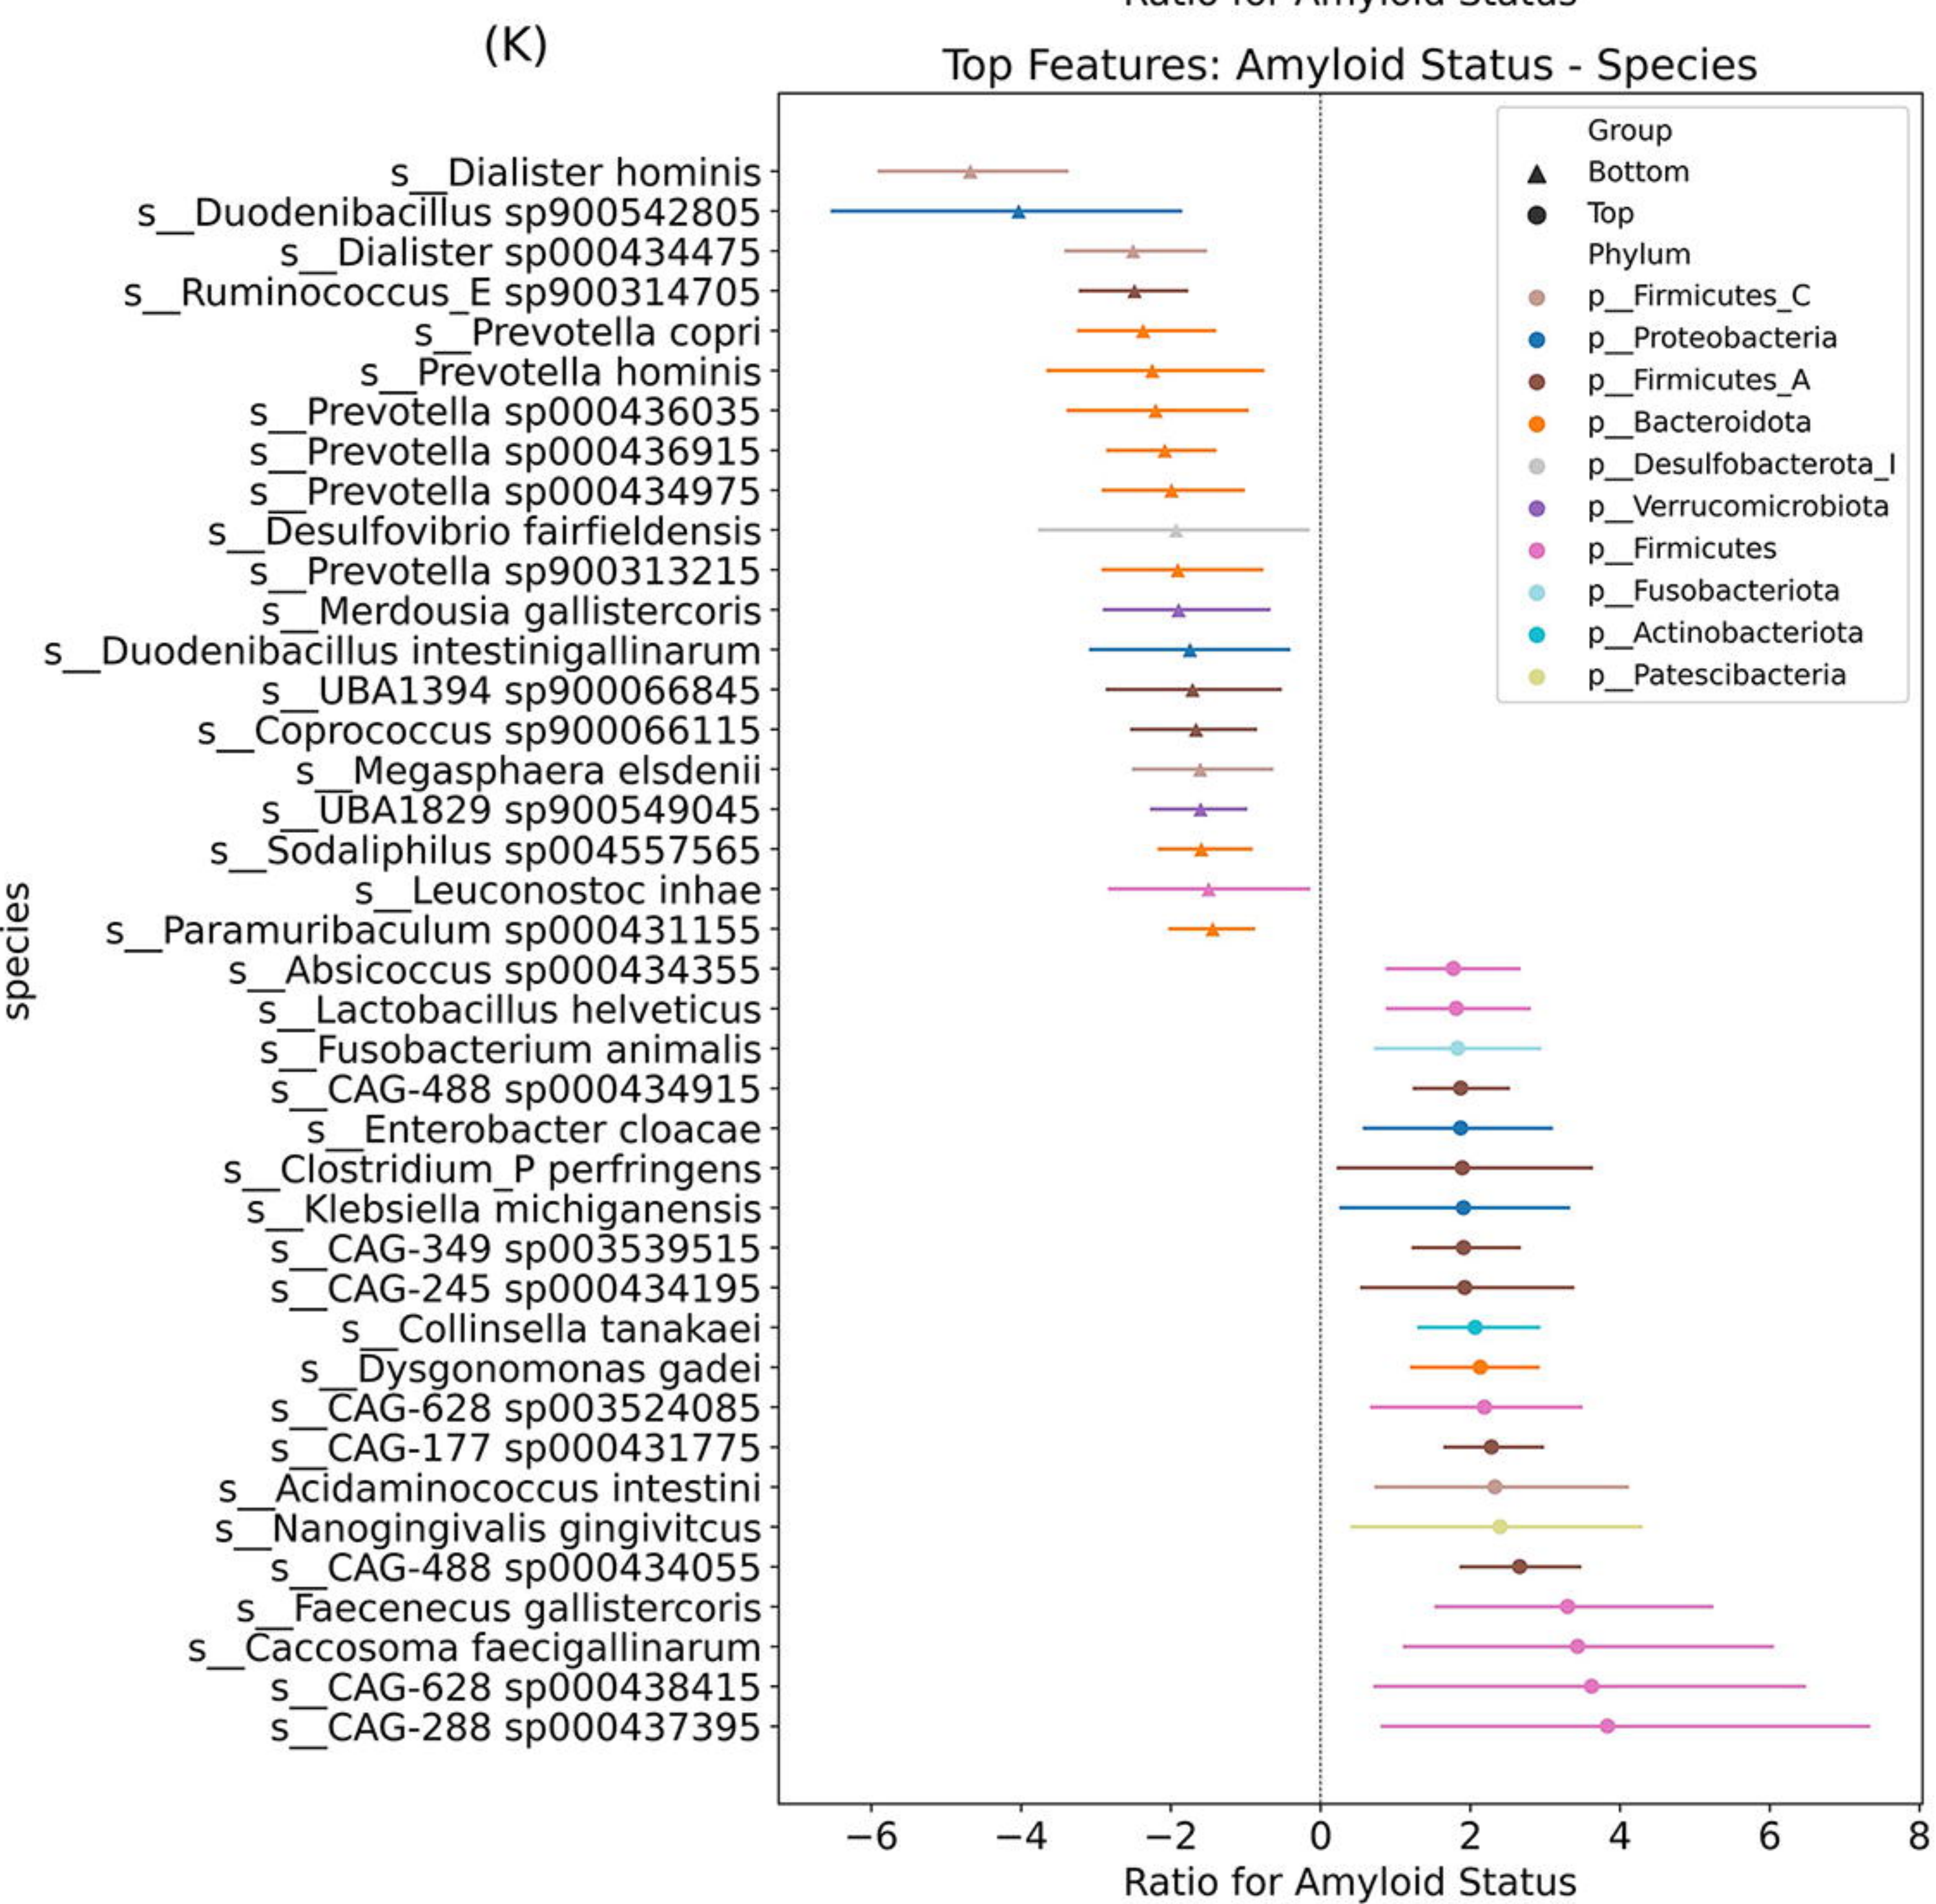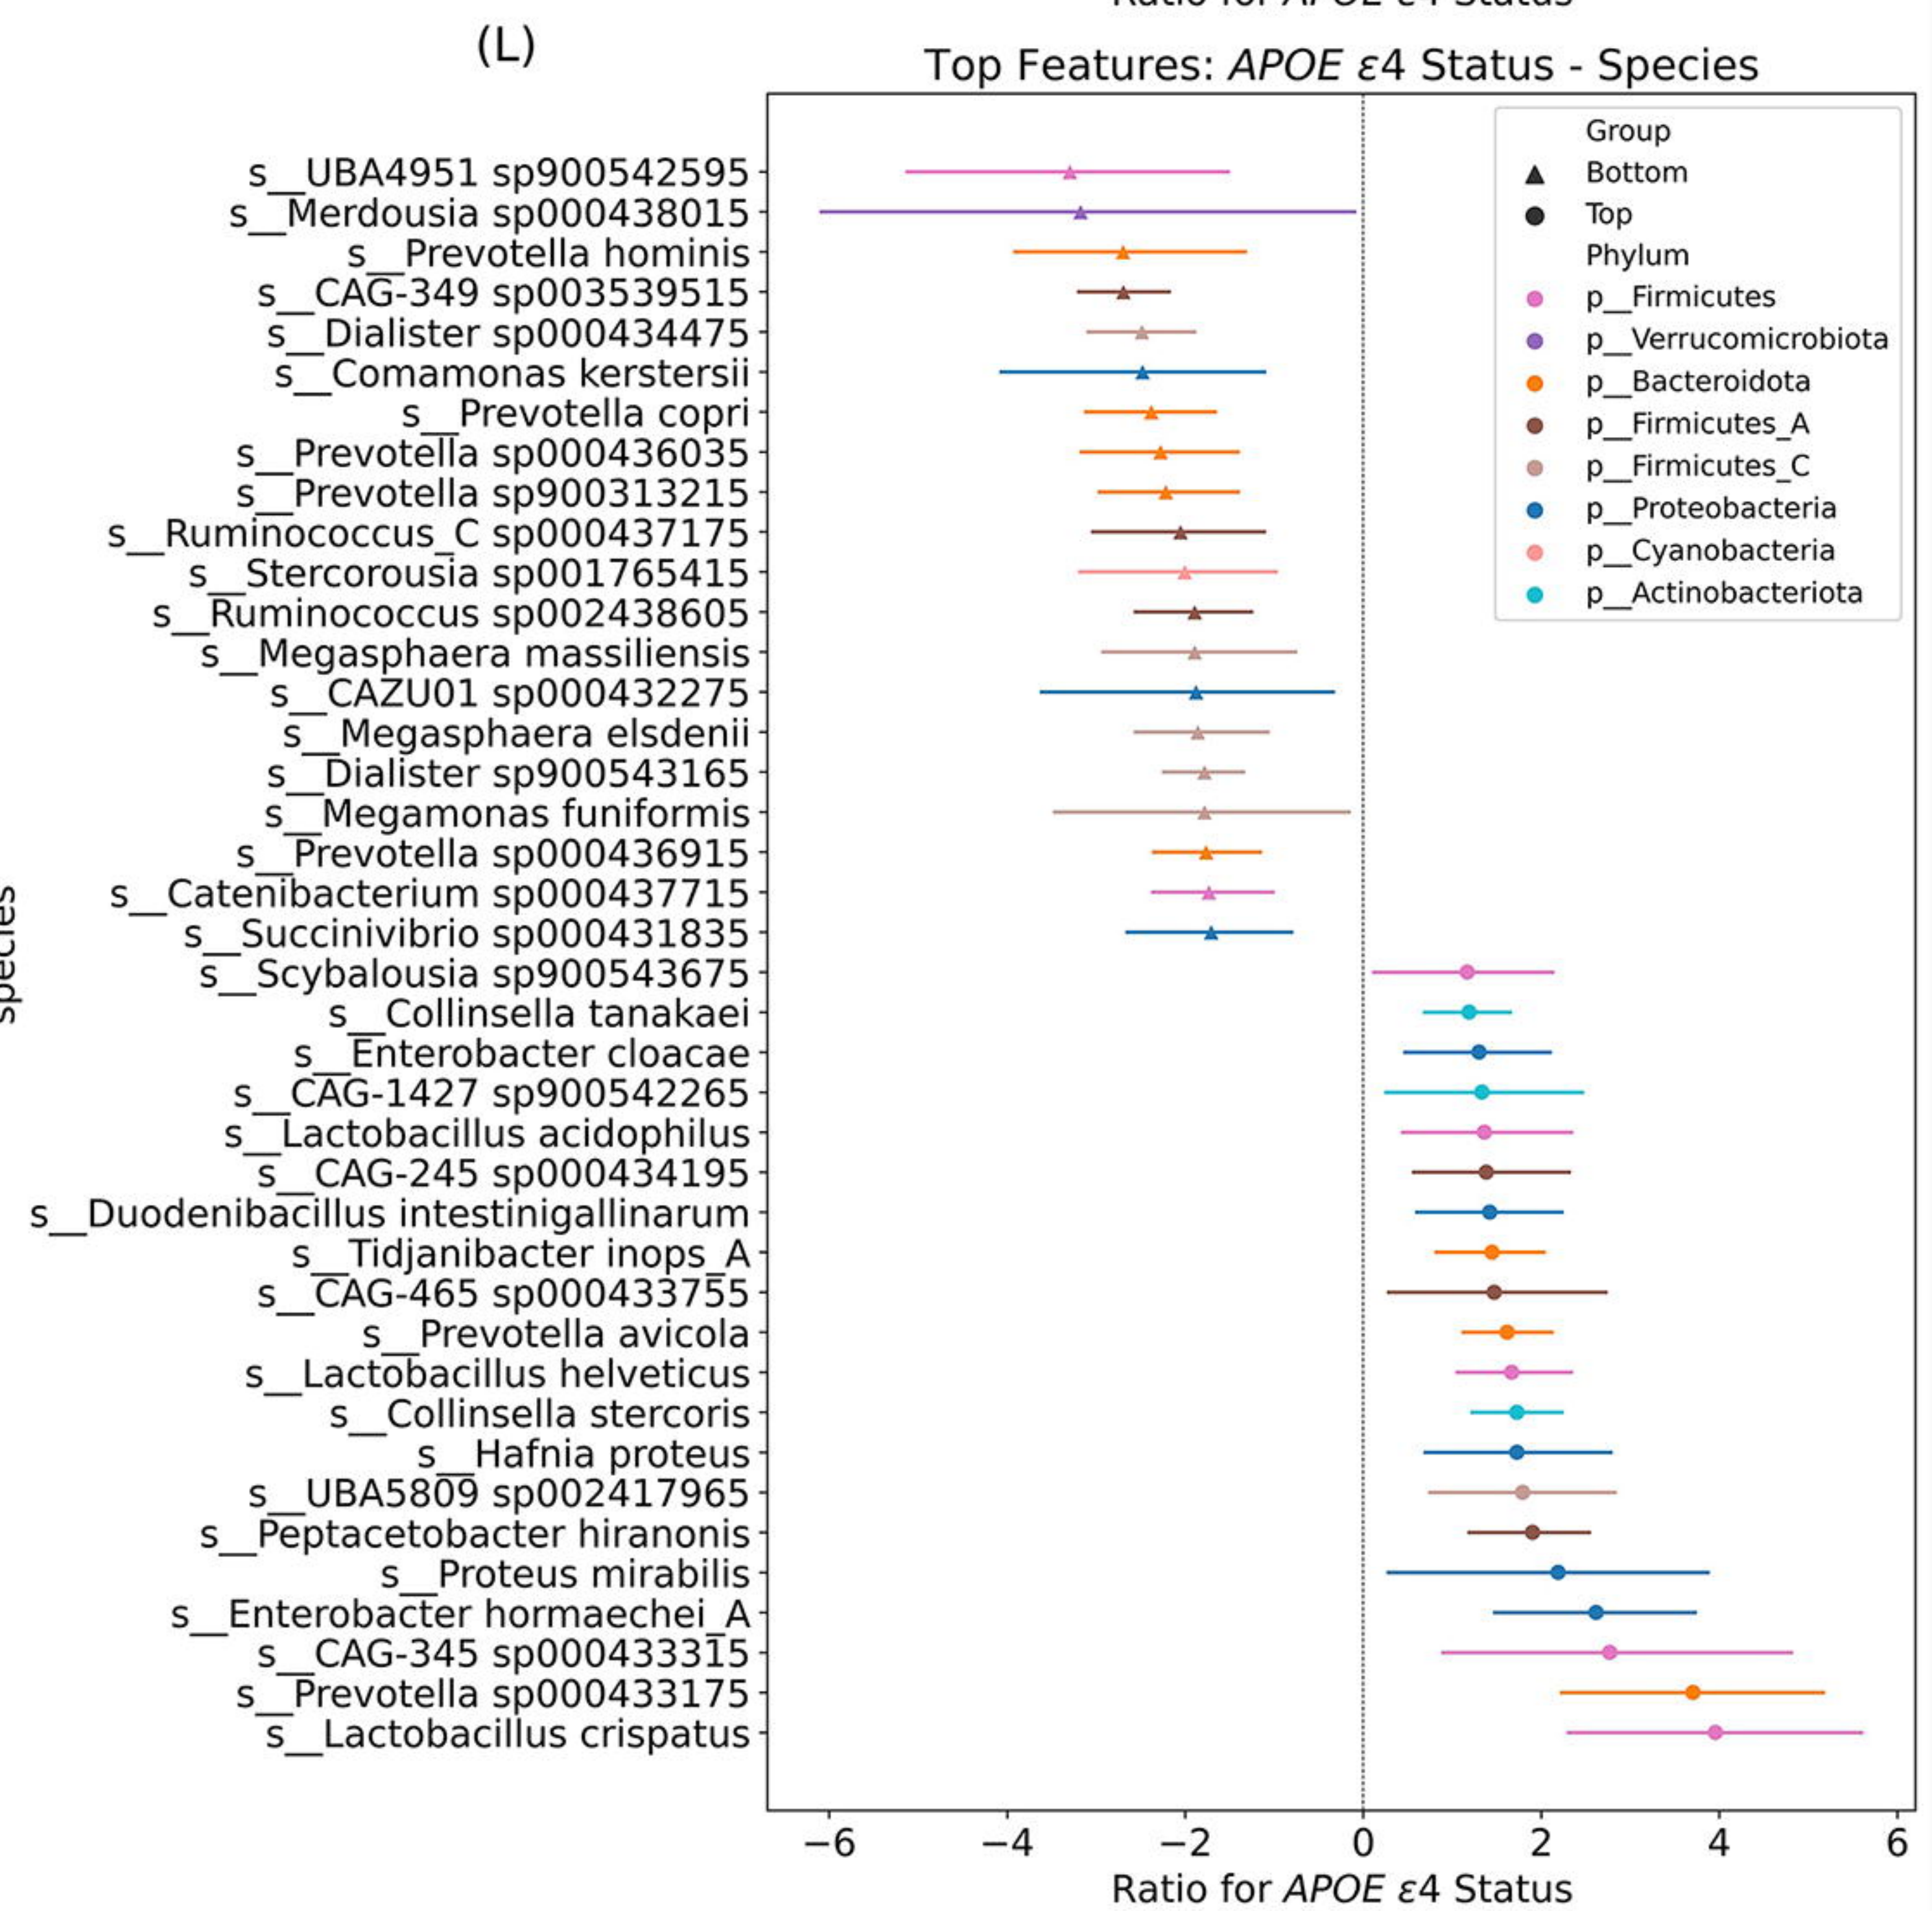

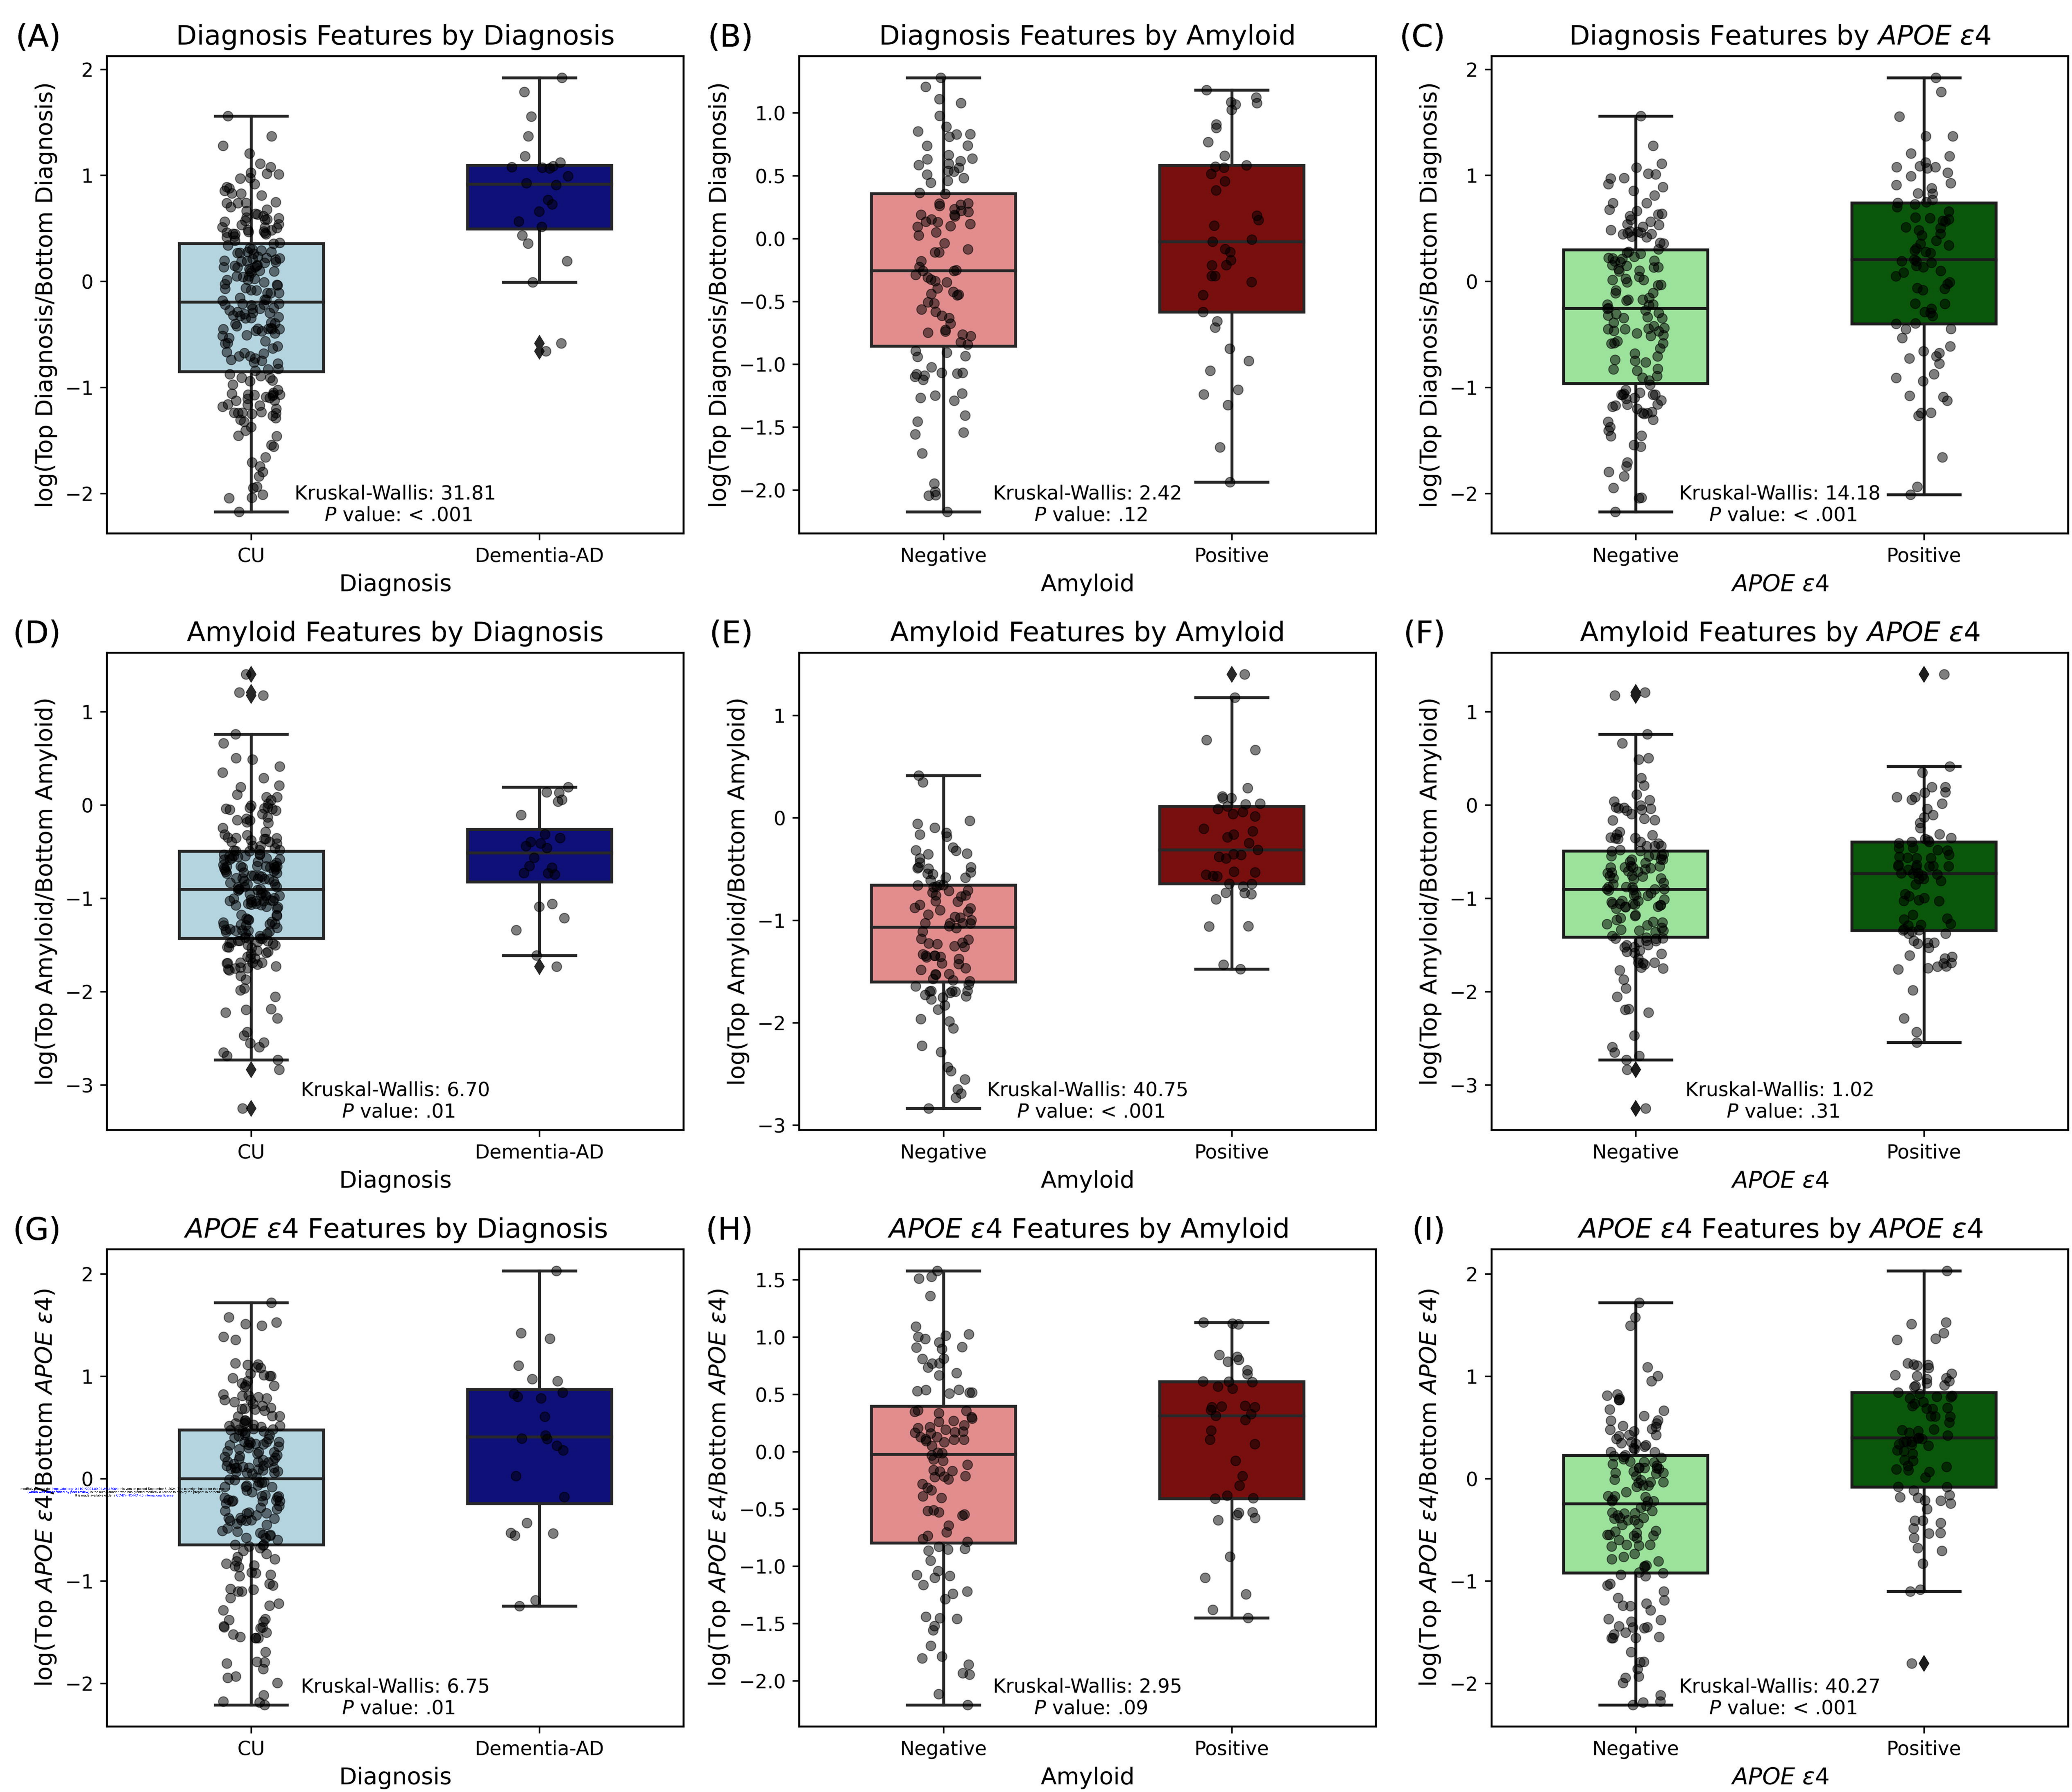

(A)

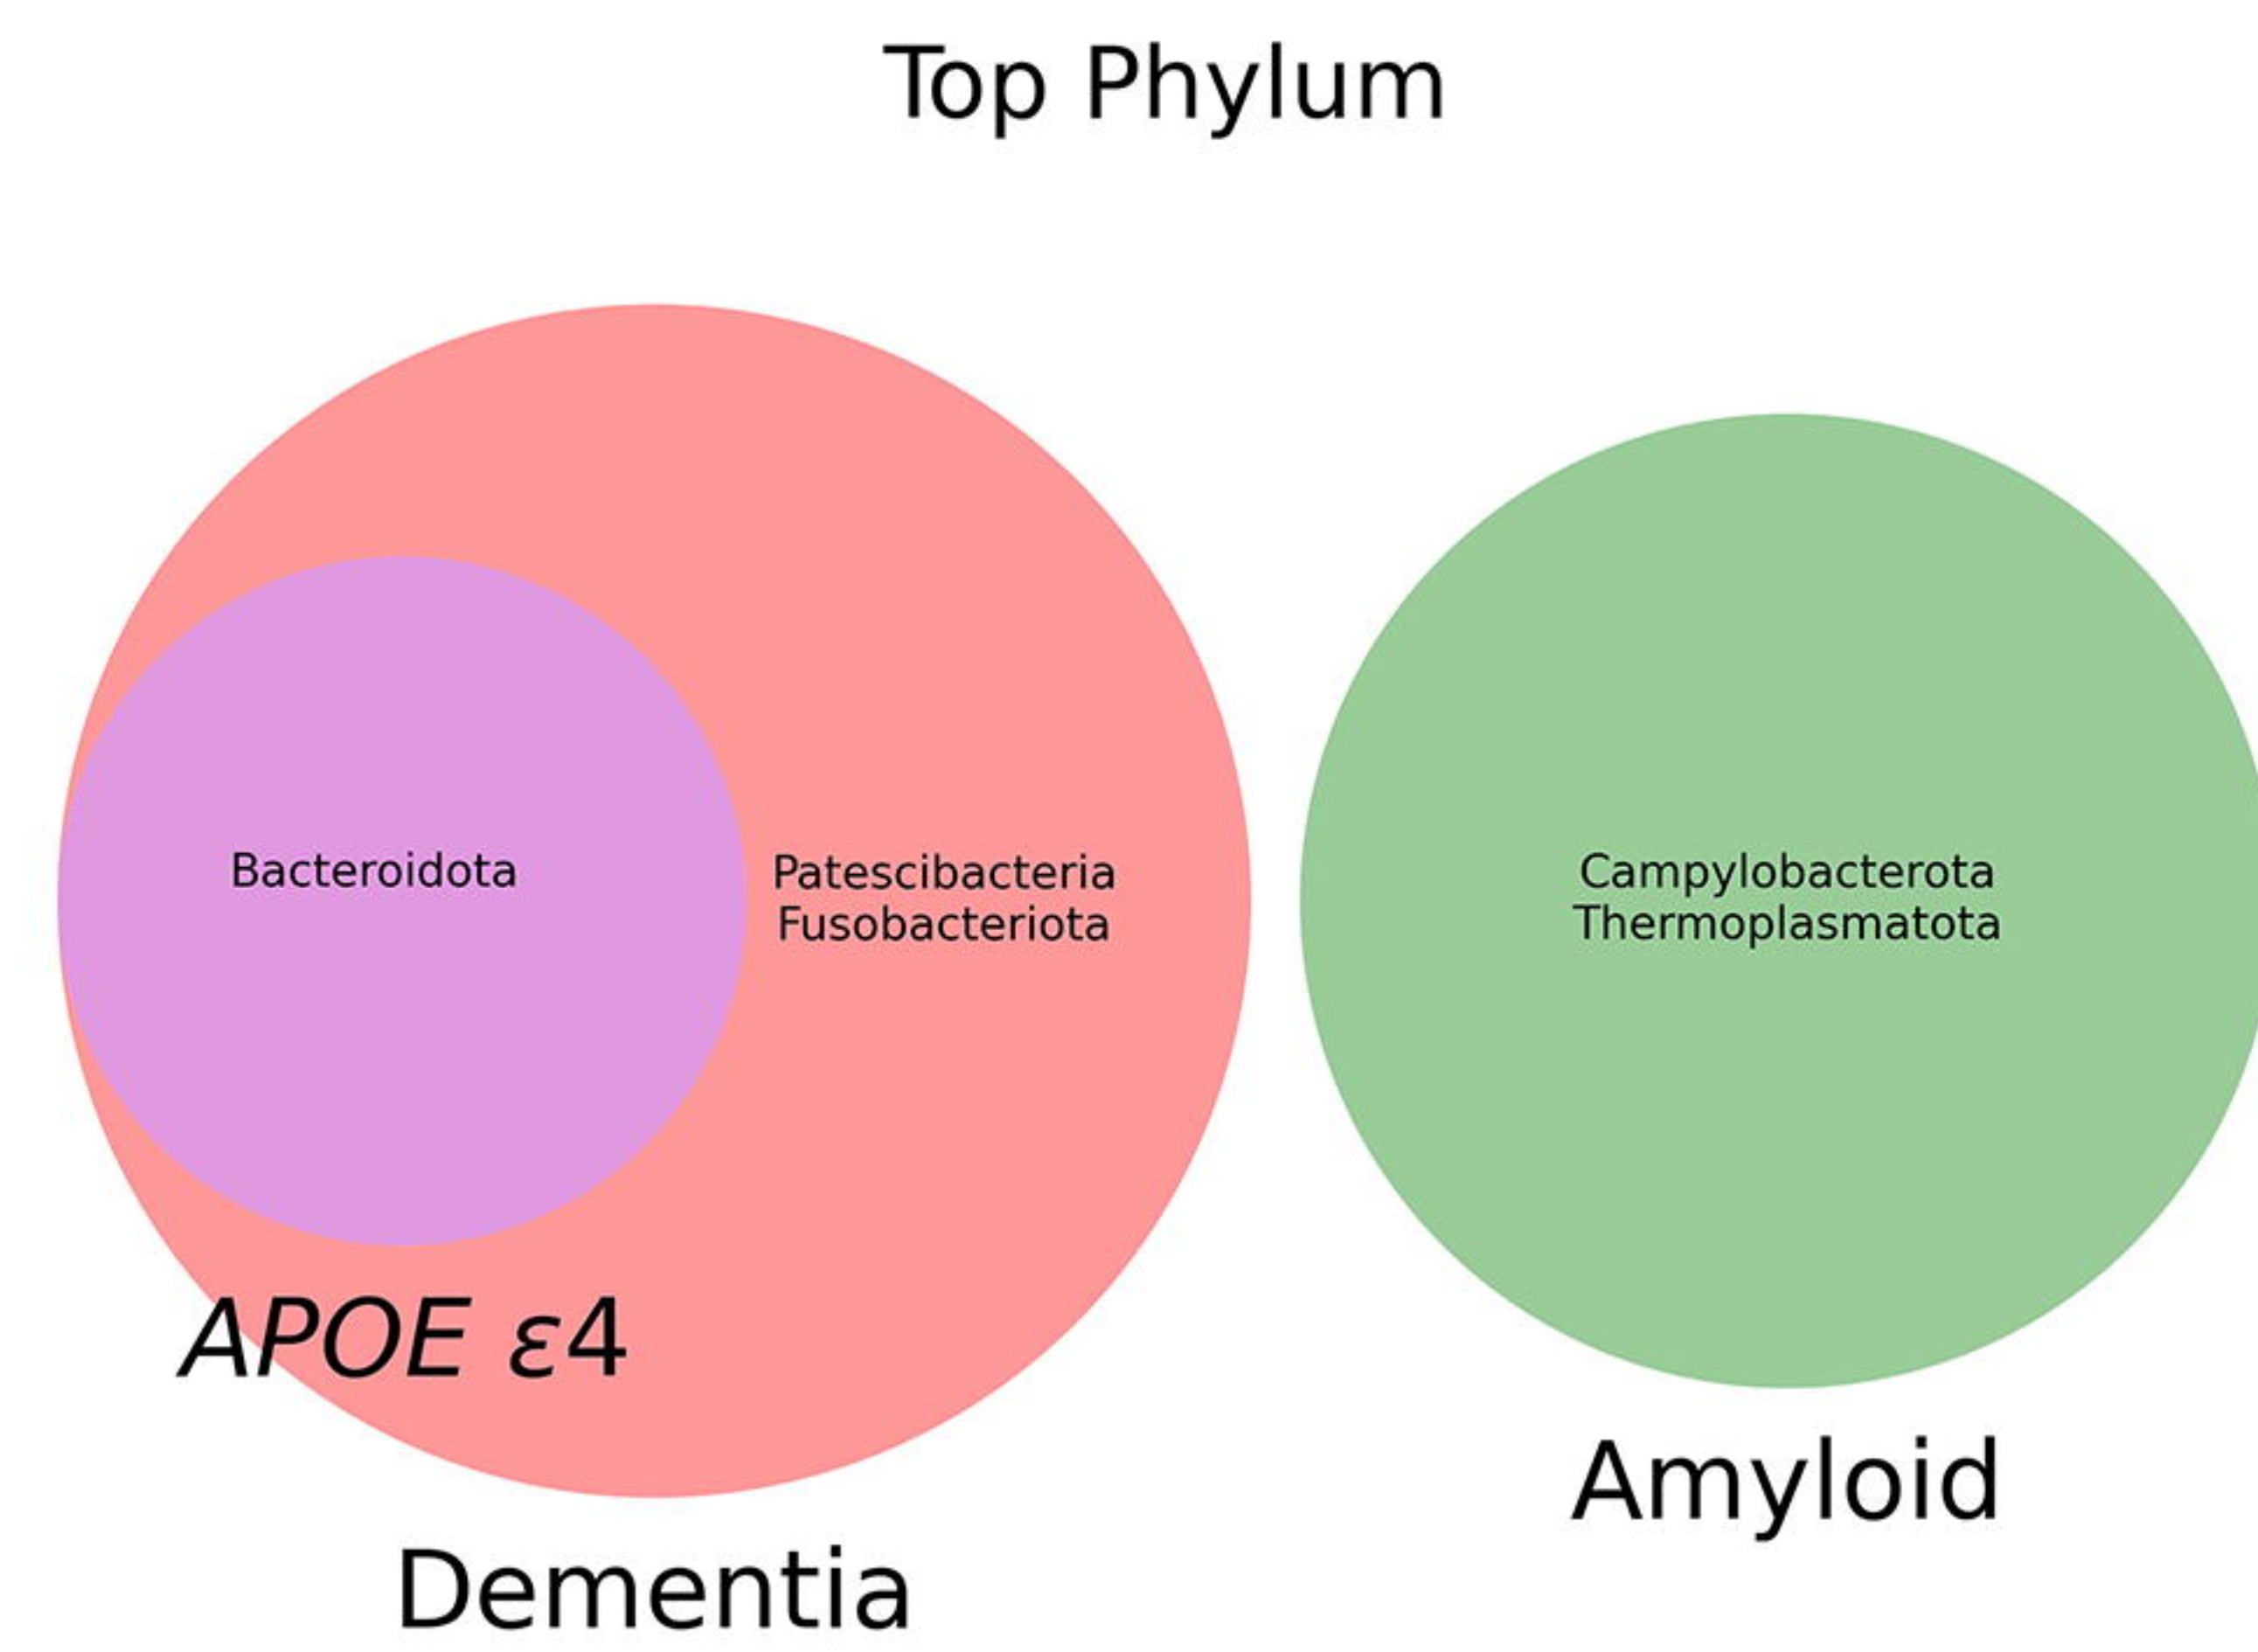

(B)

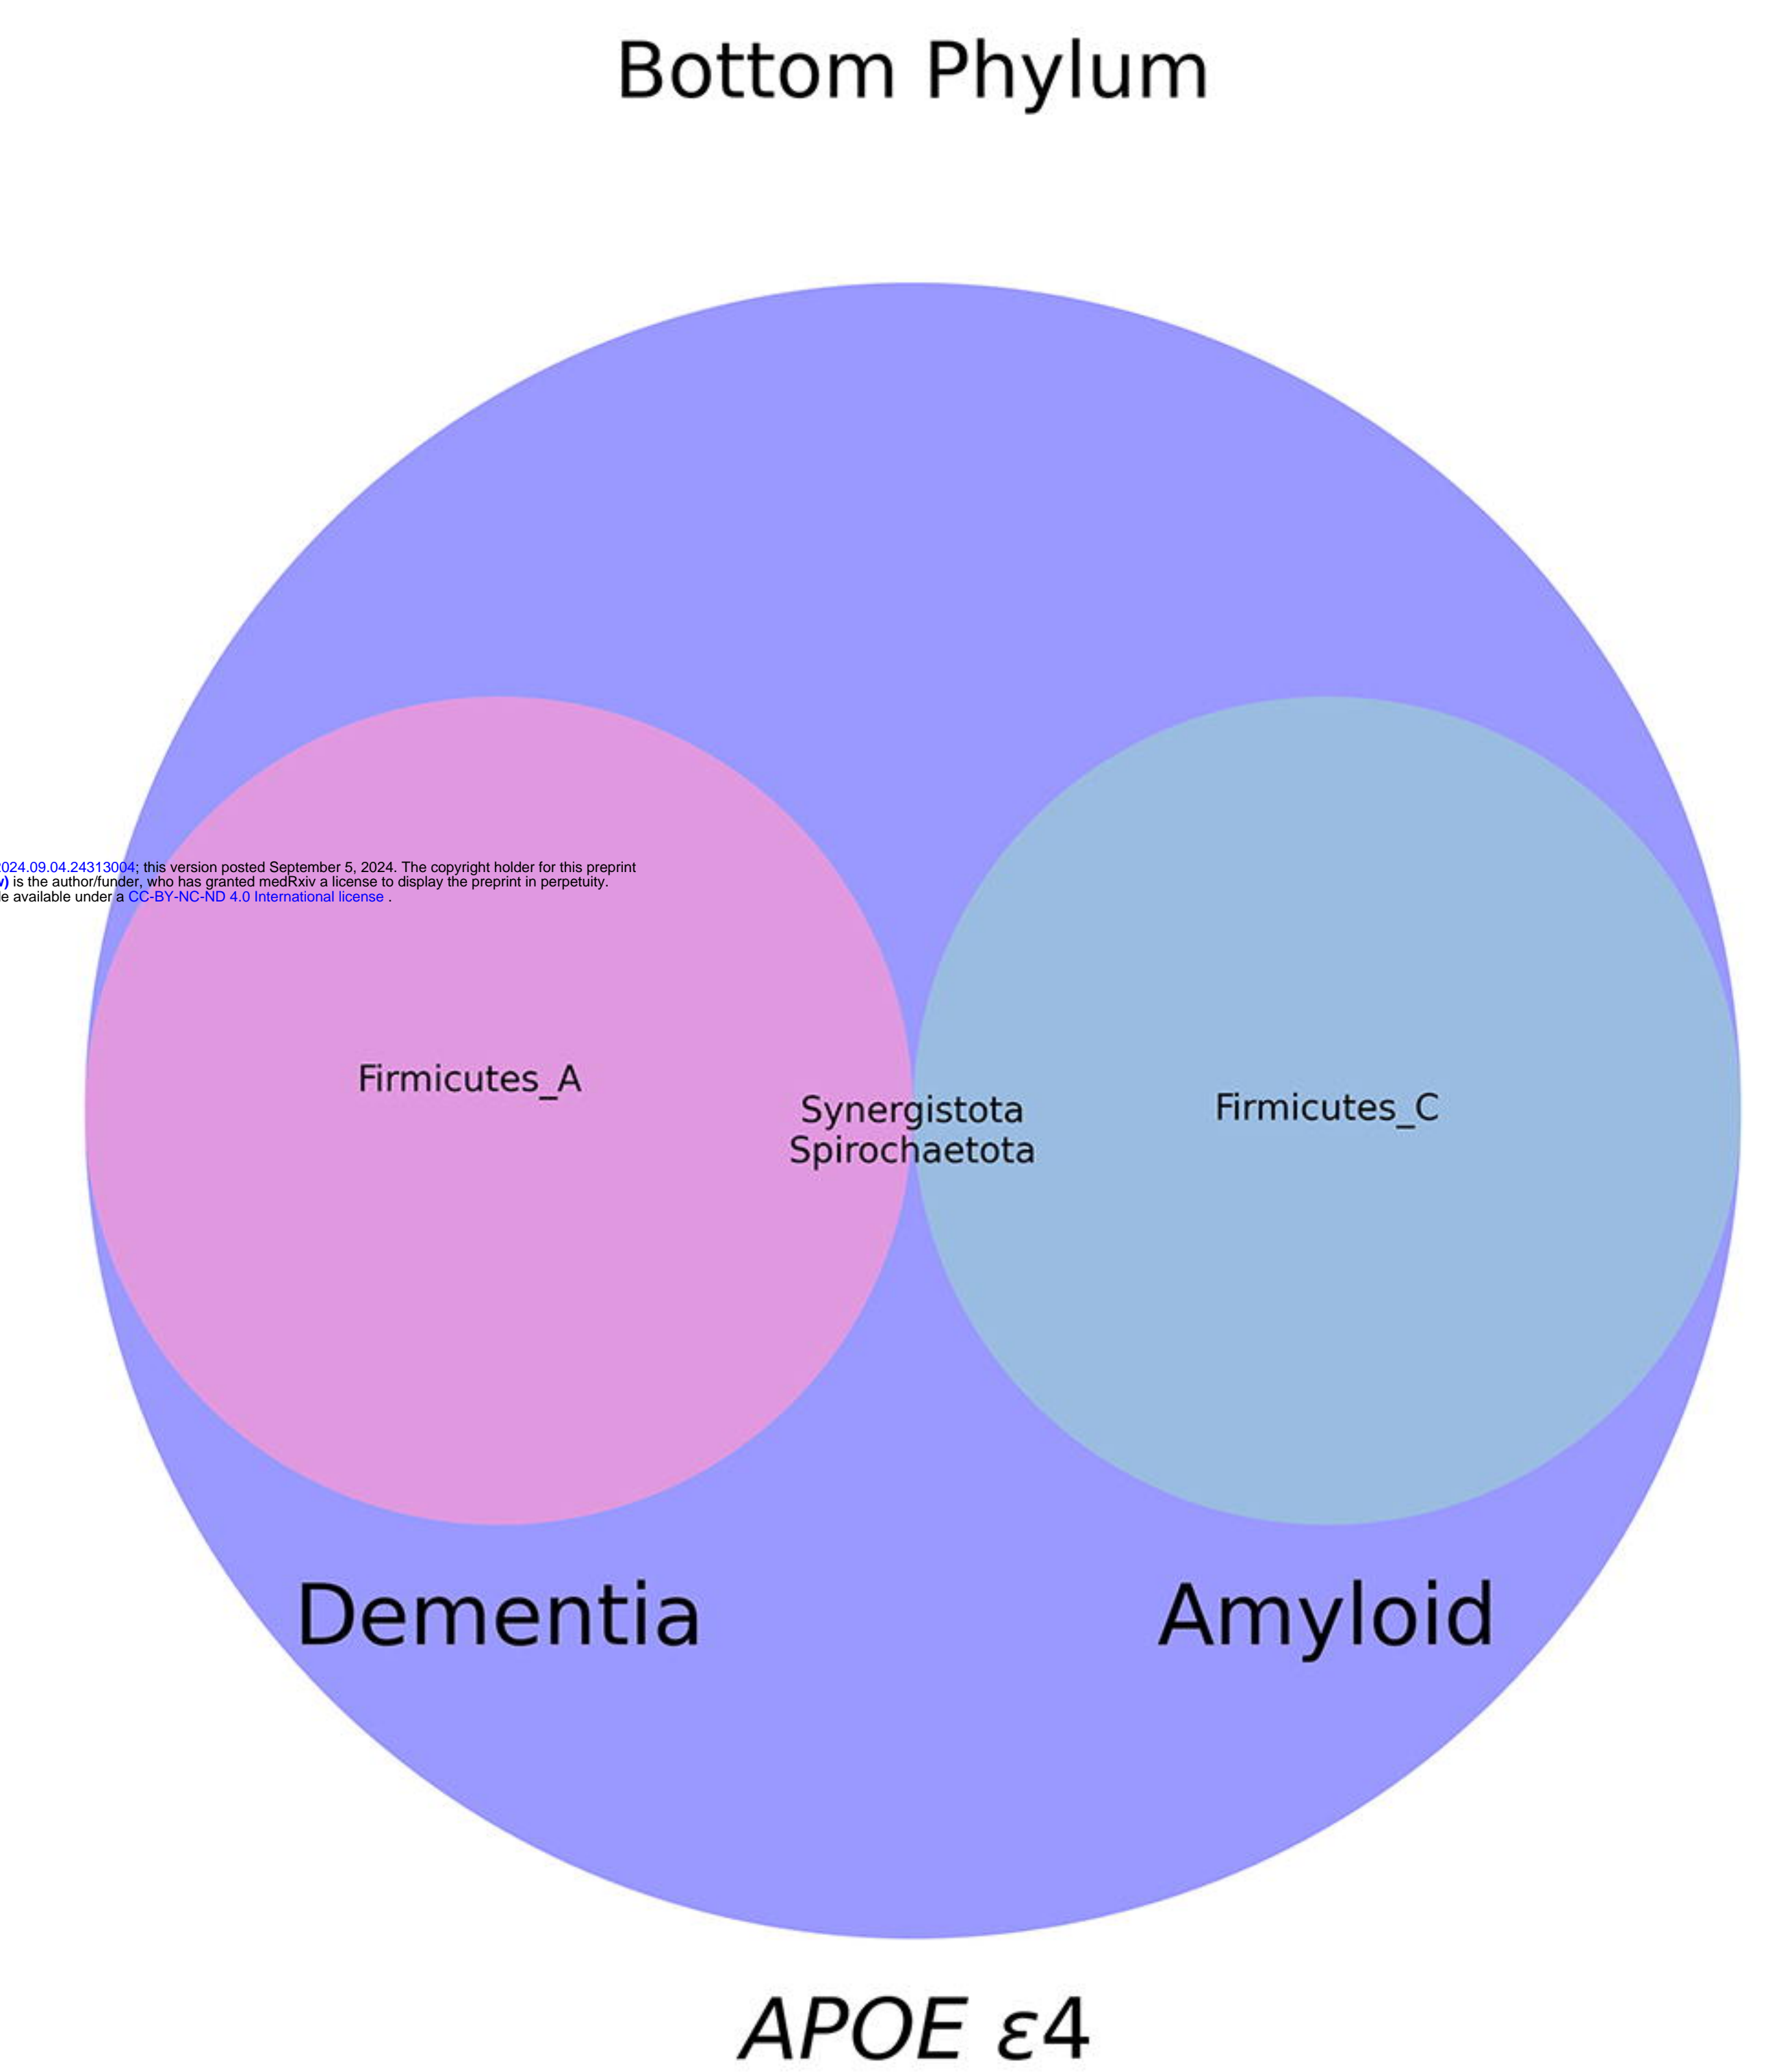

(C)

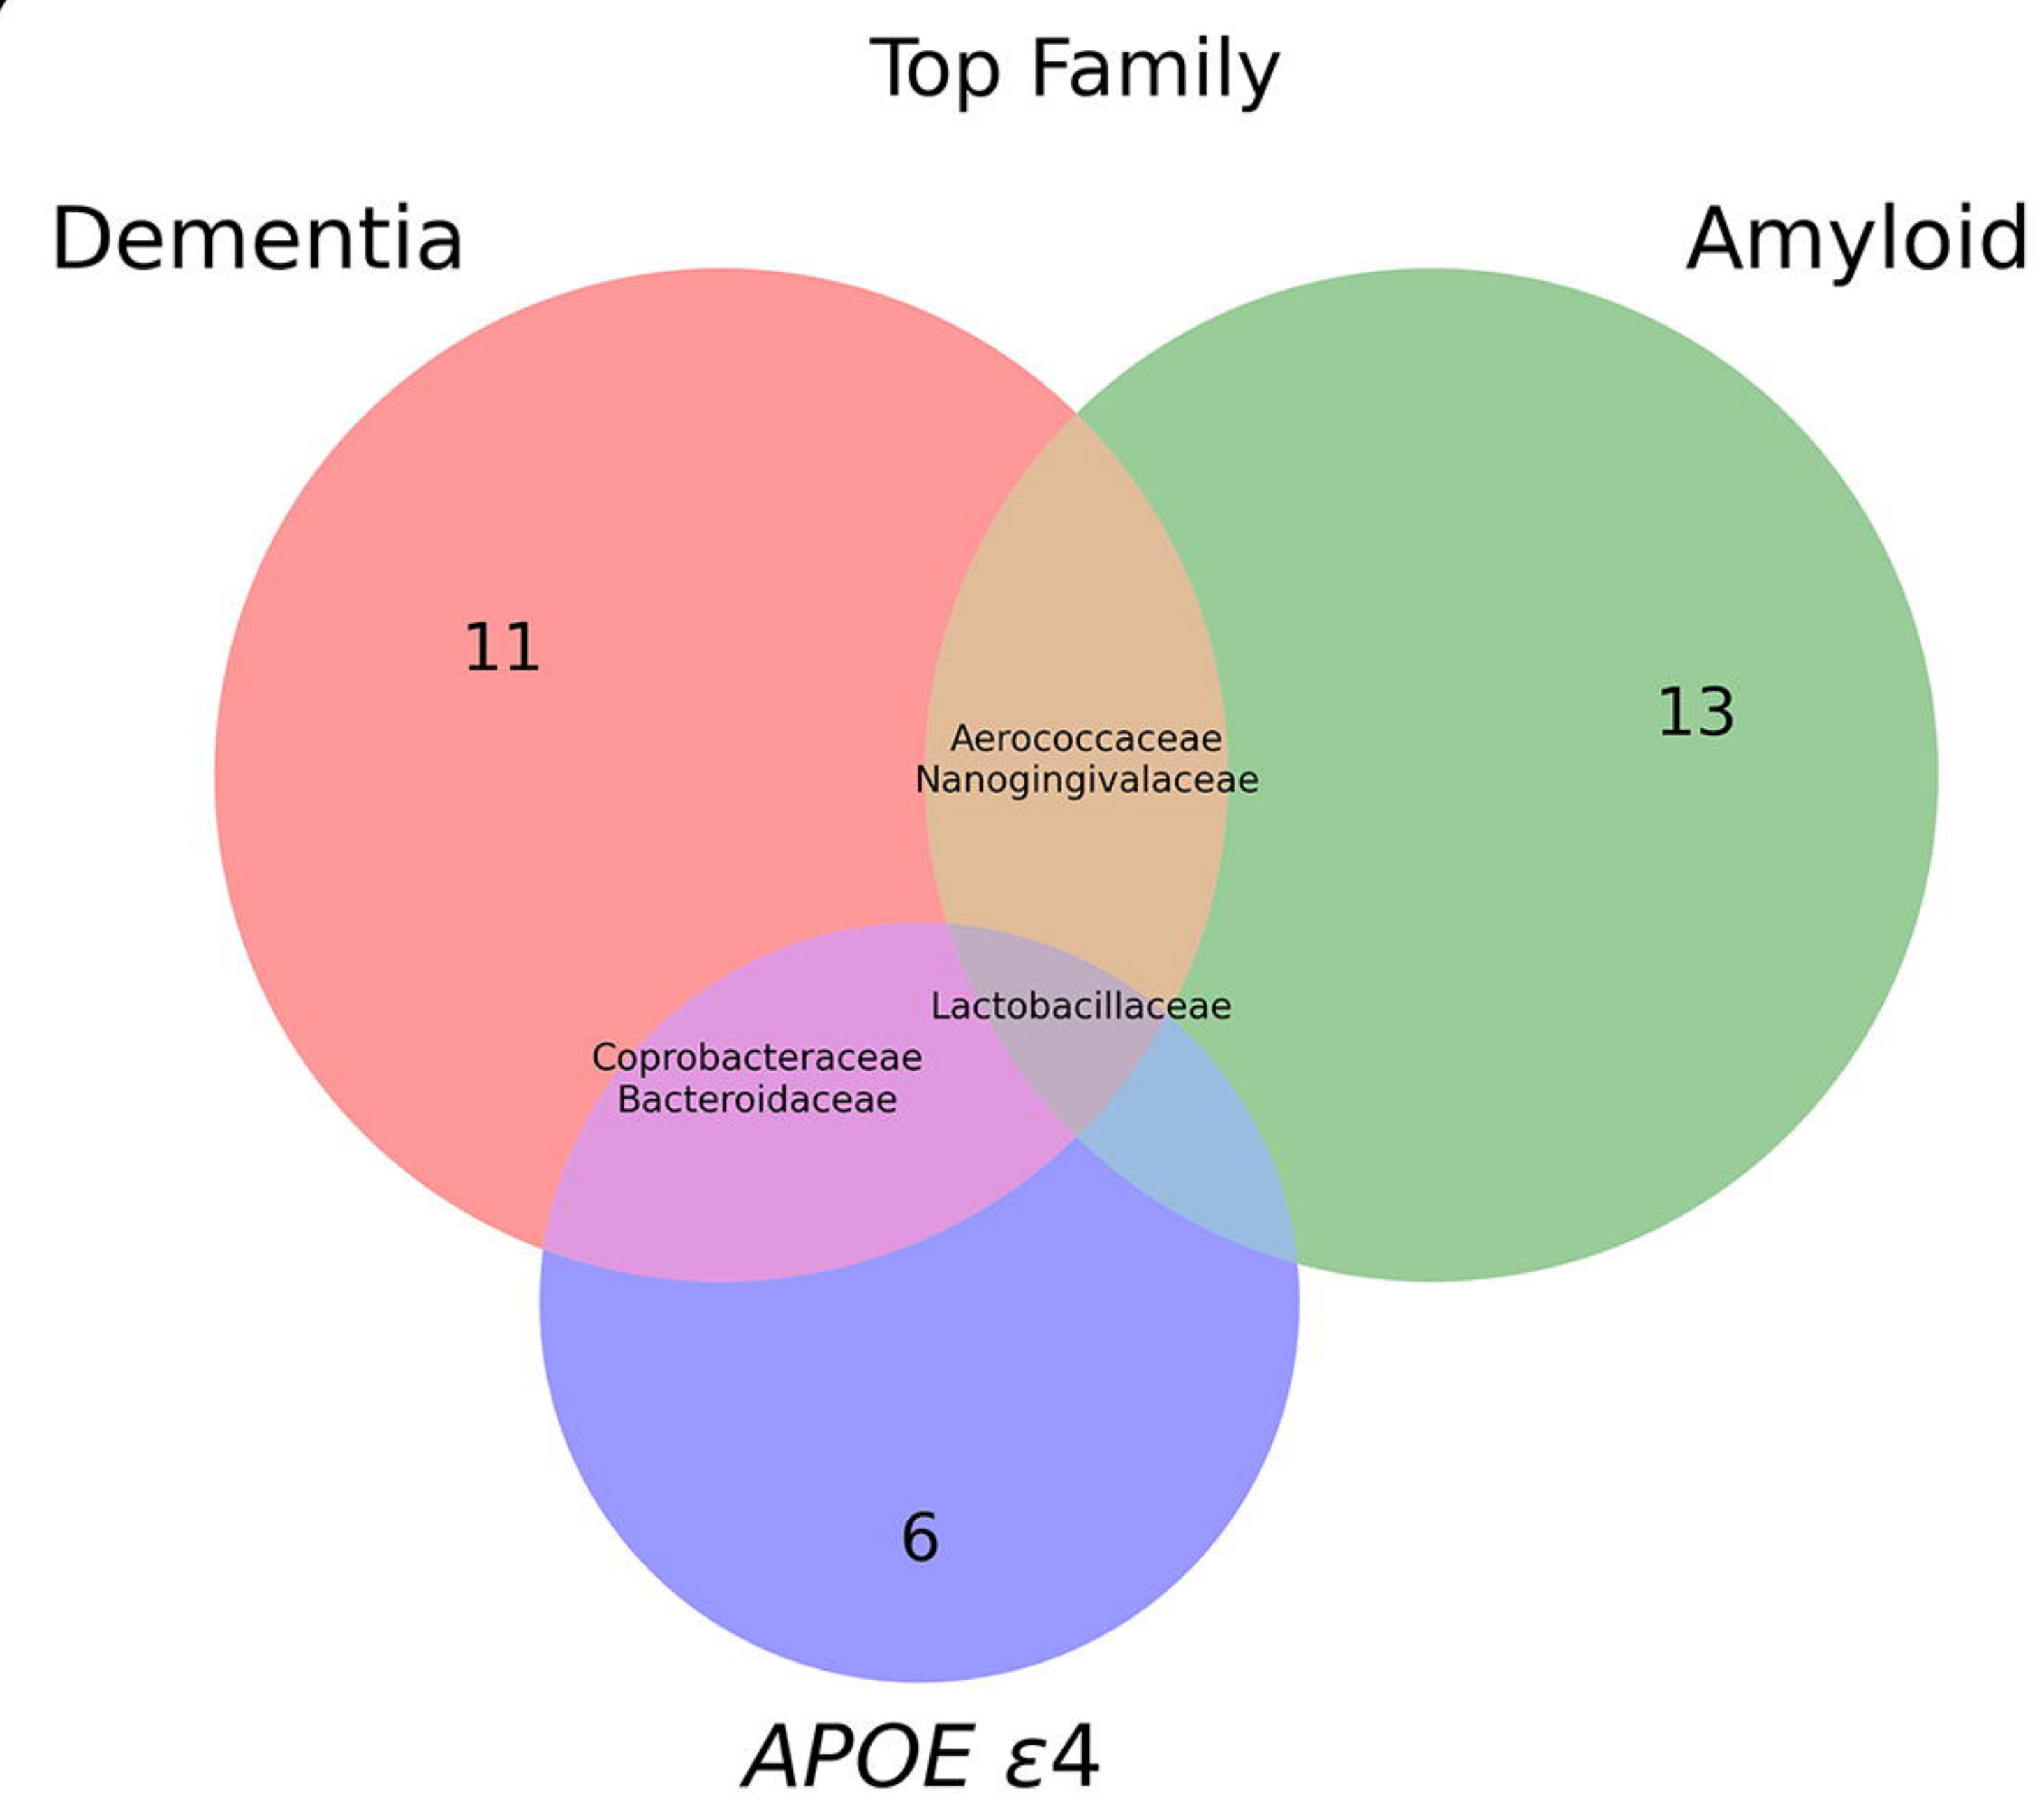

(D)

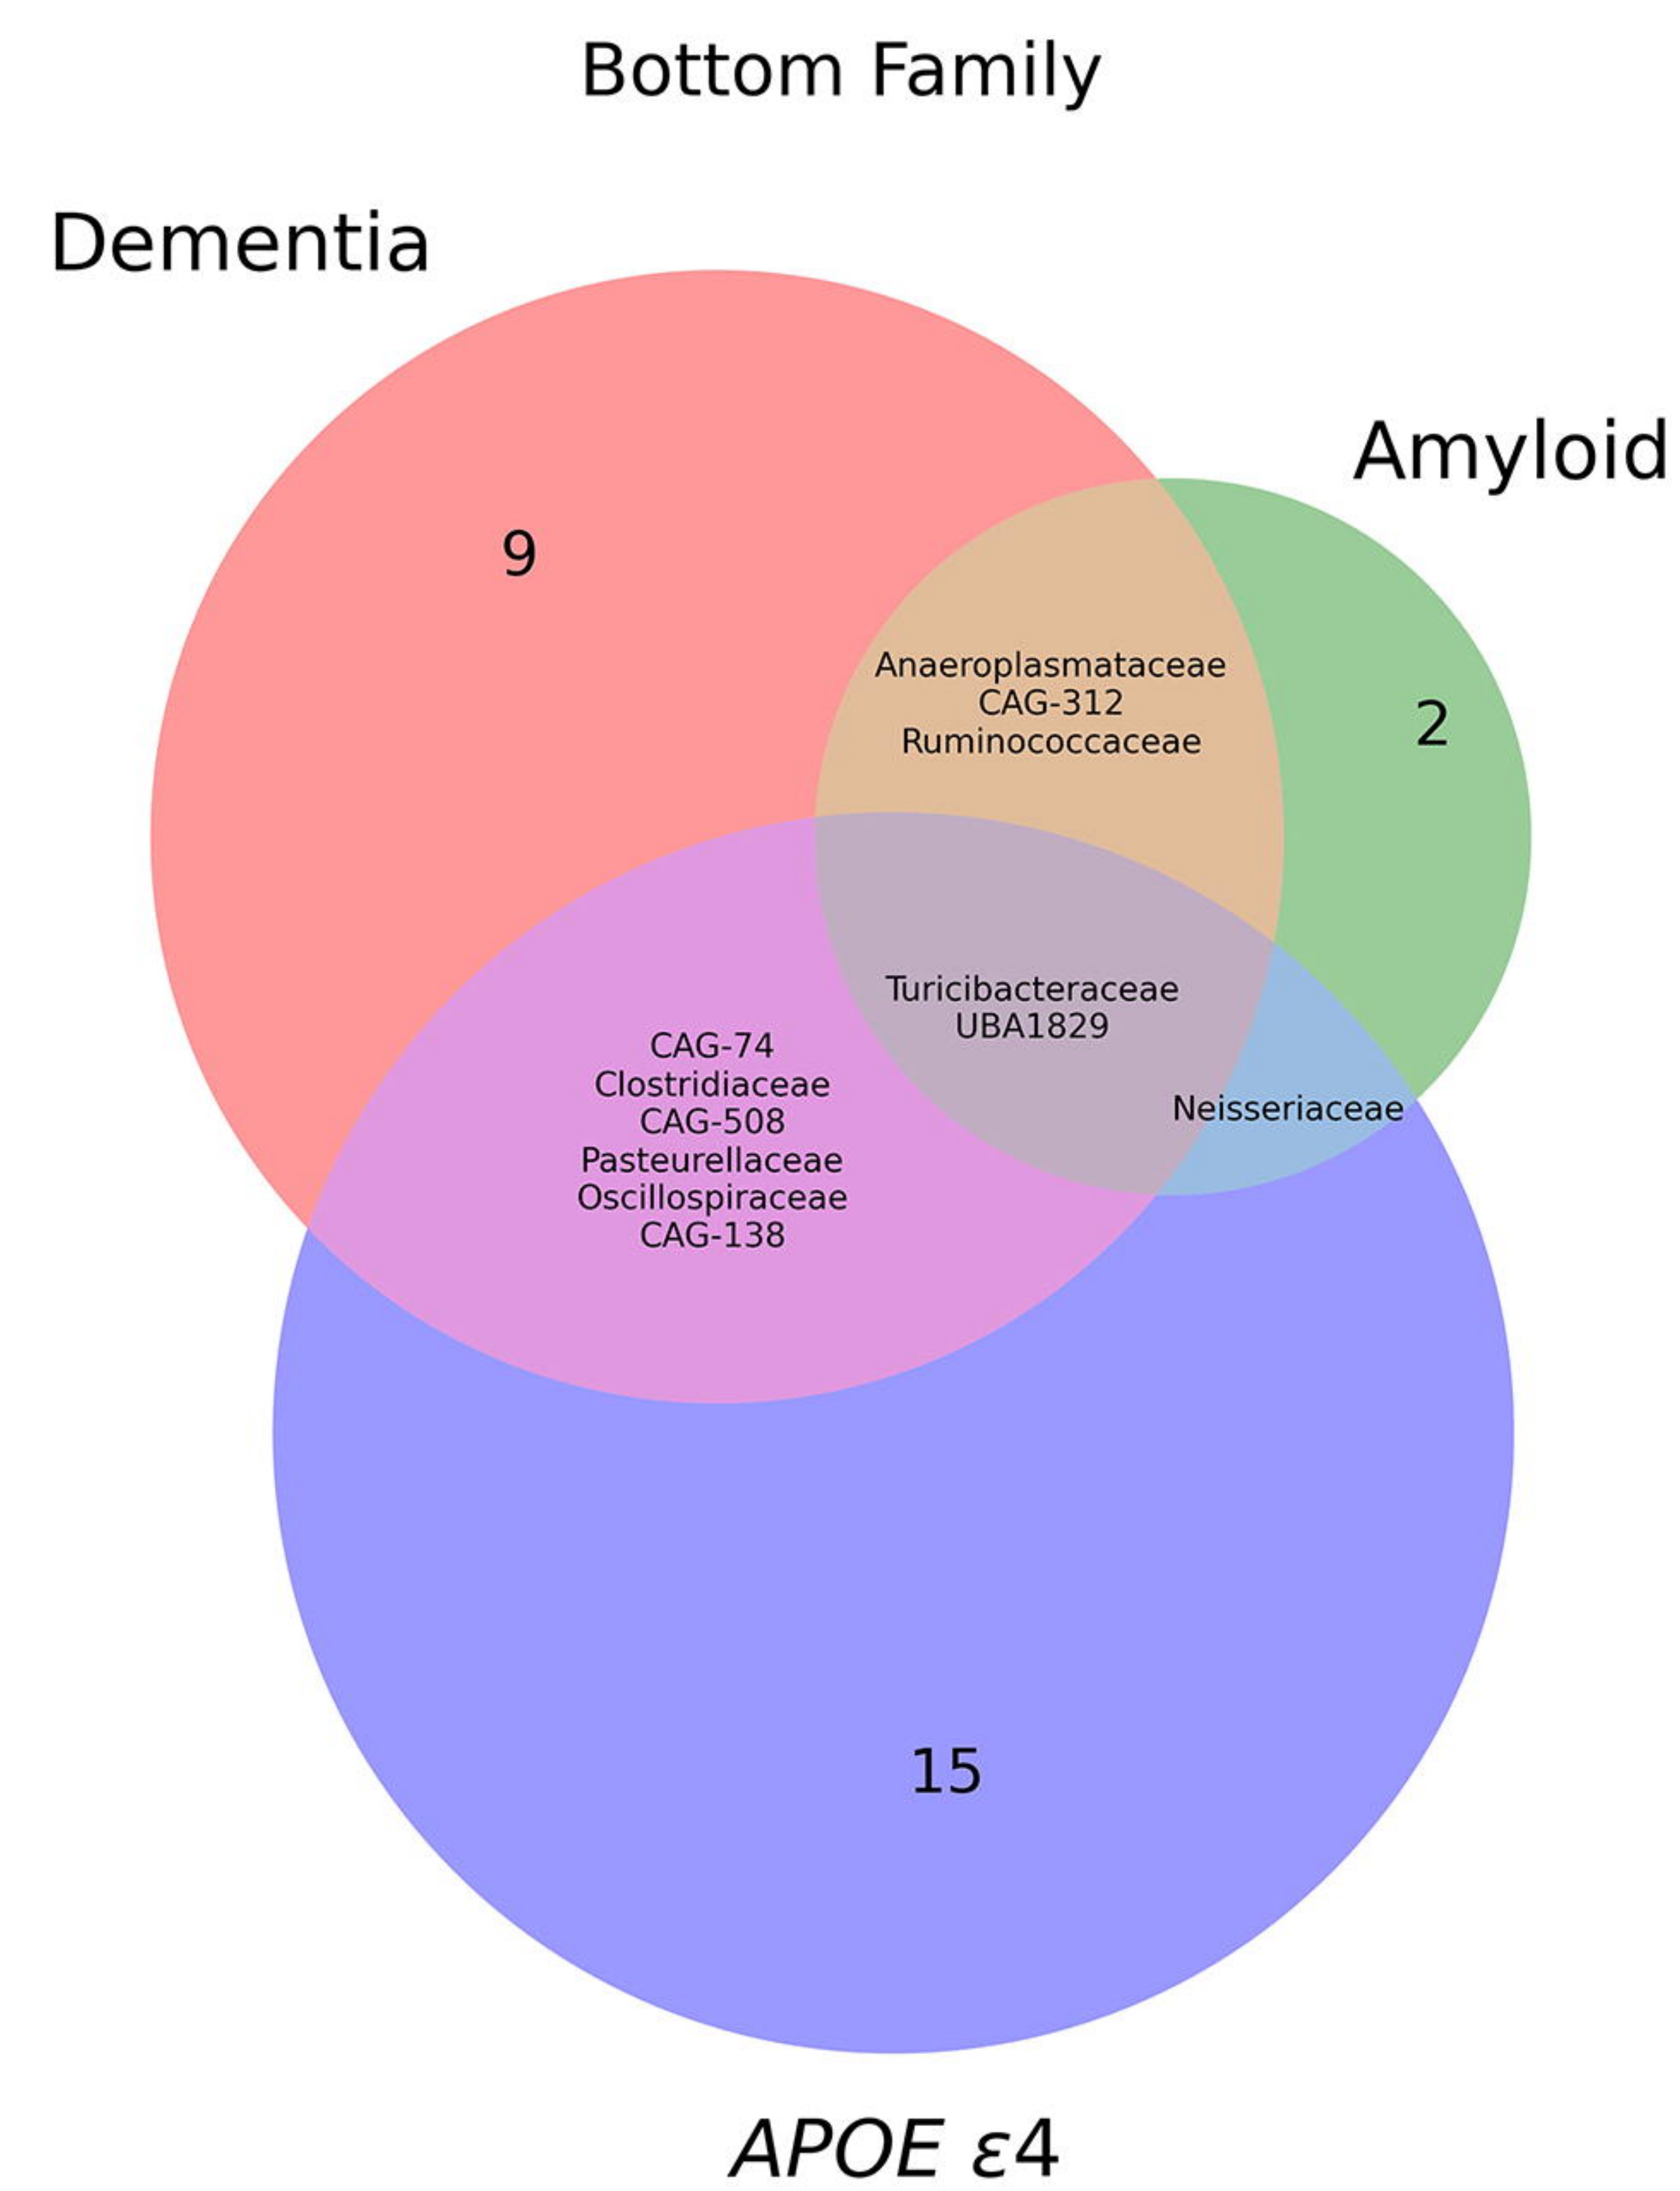

(E)

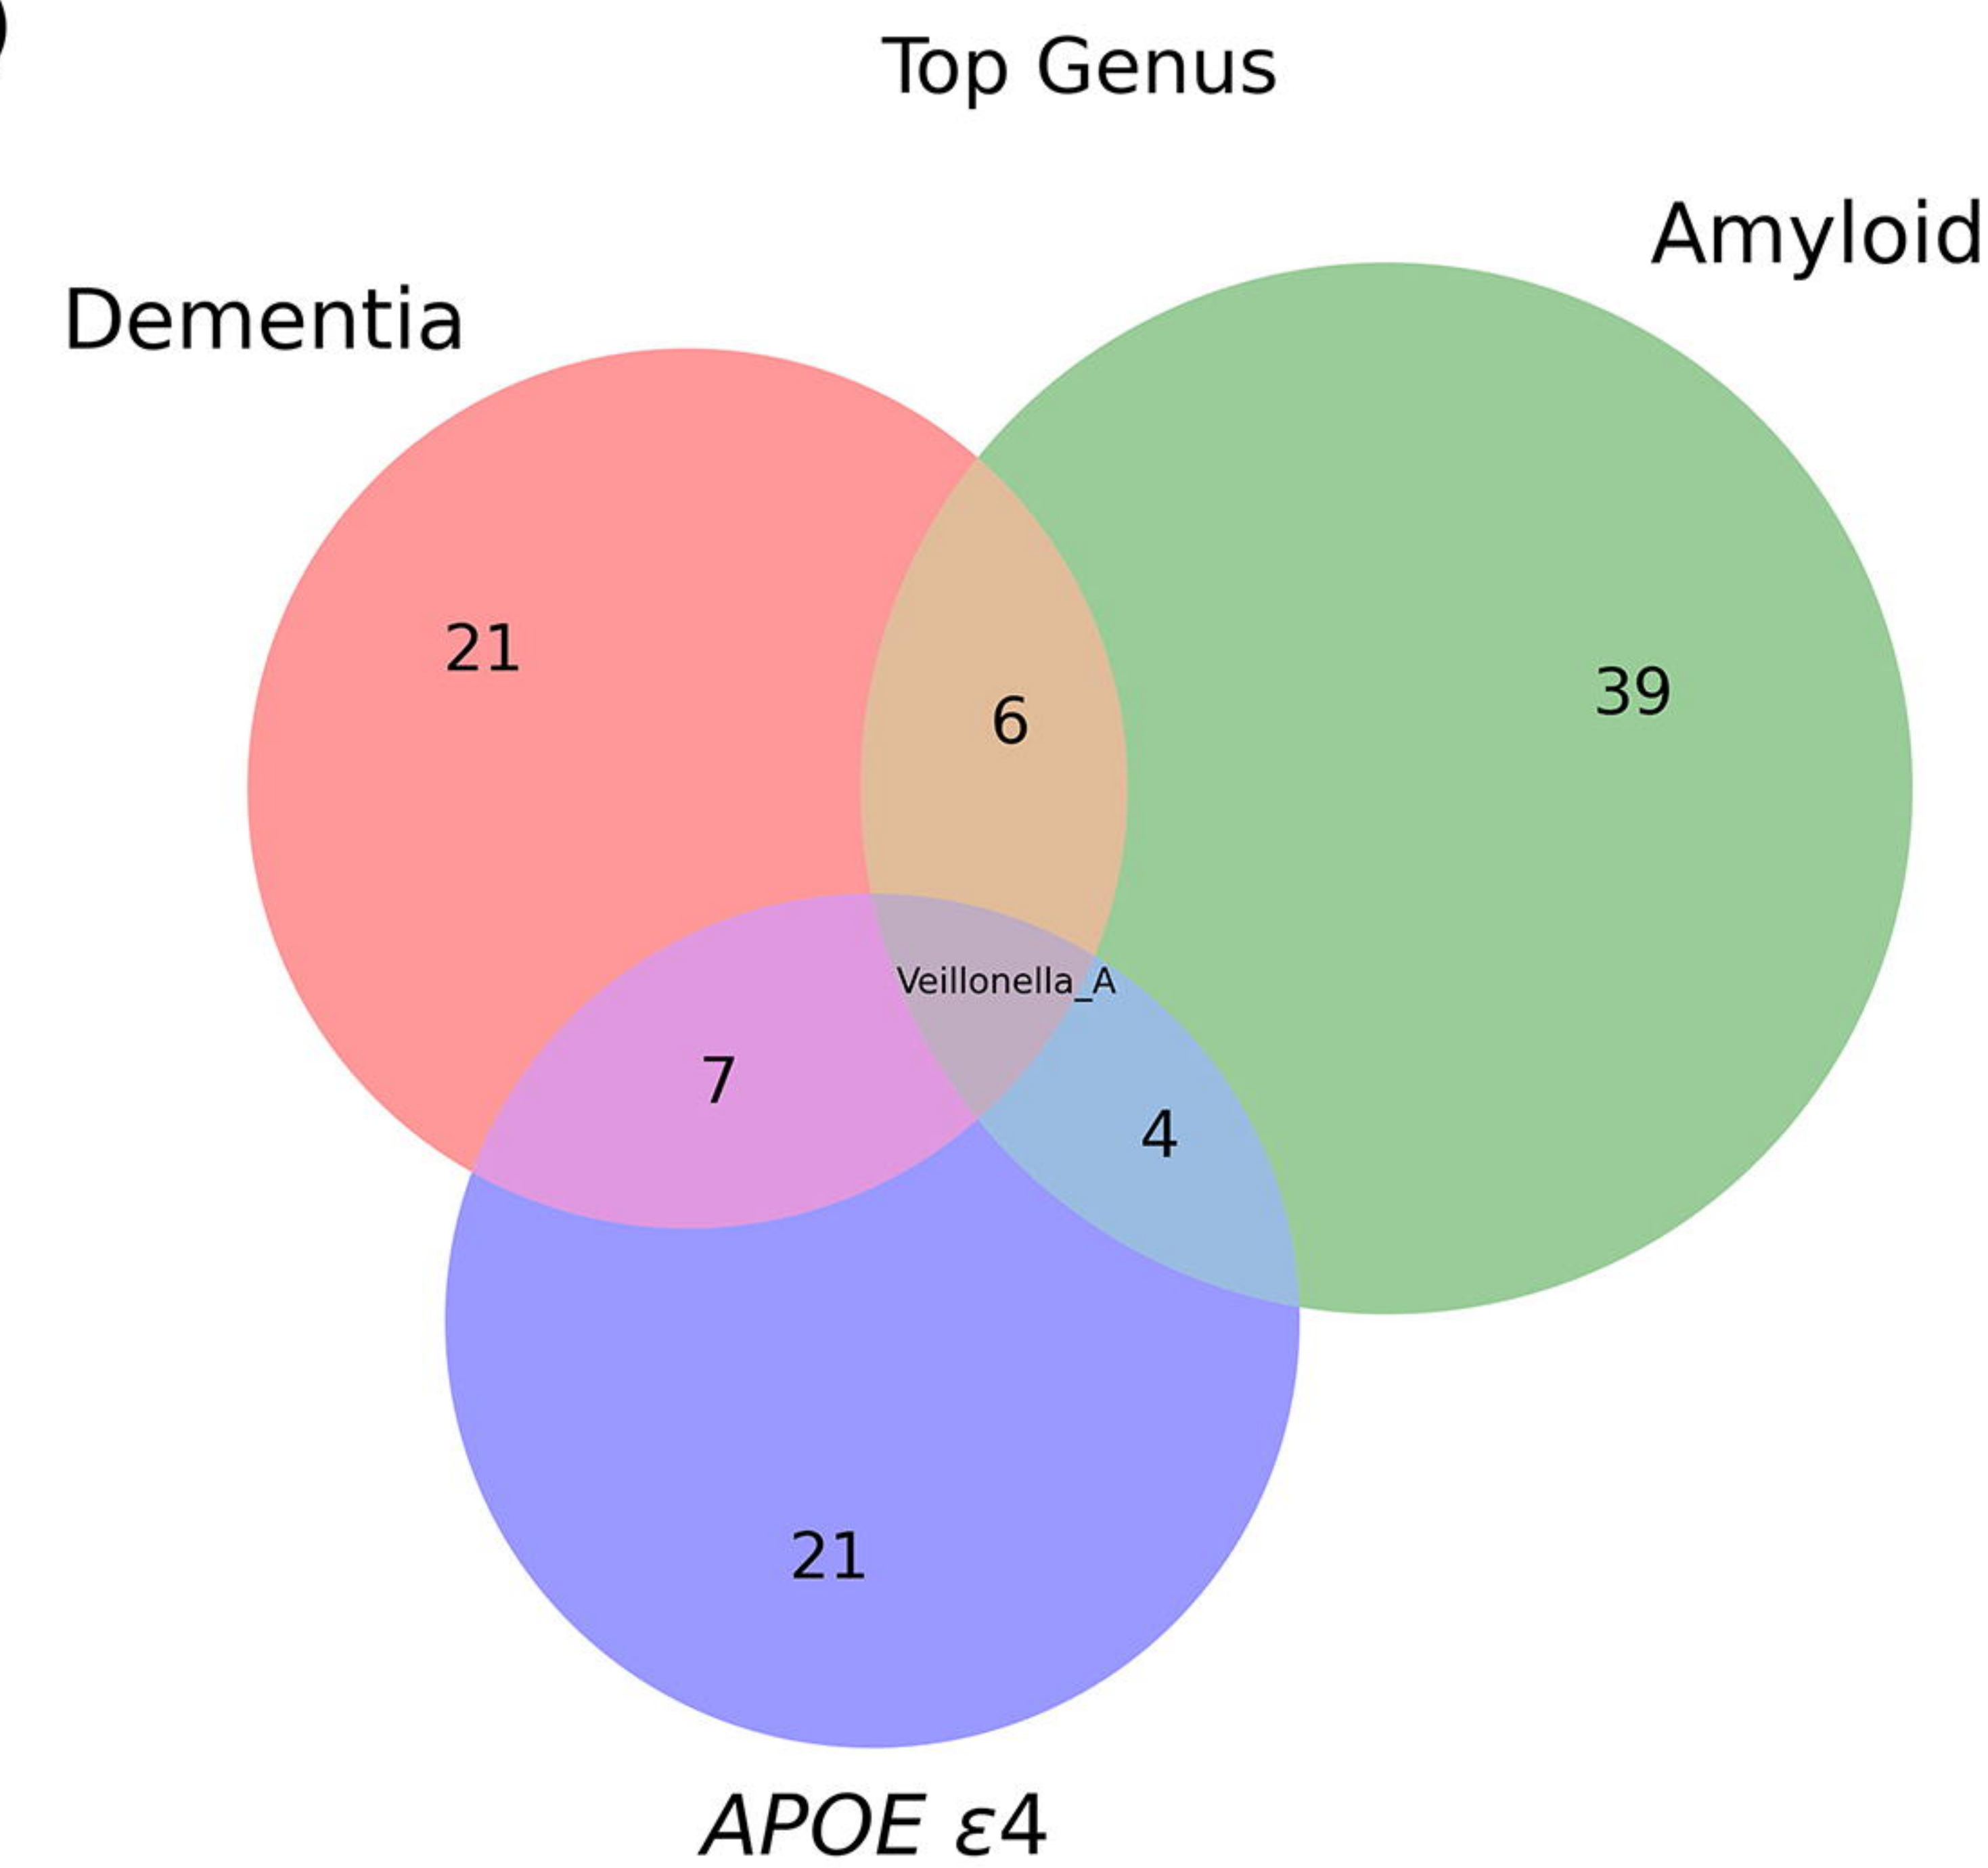

(F)

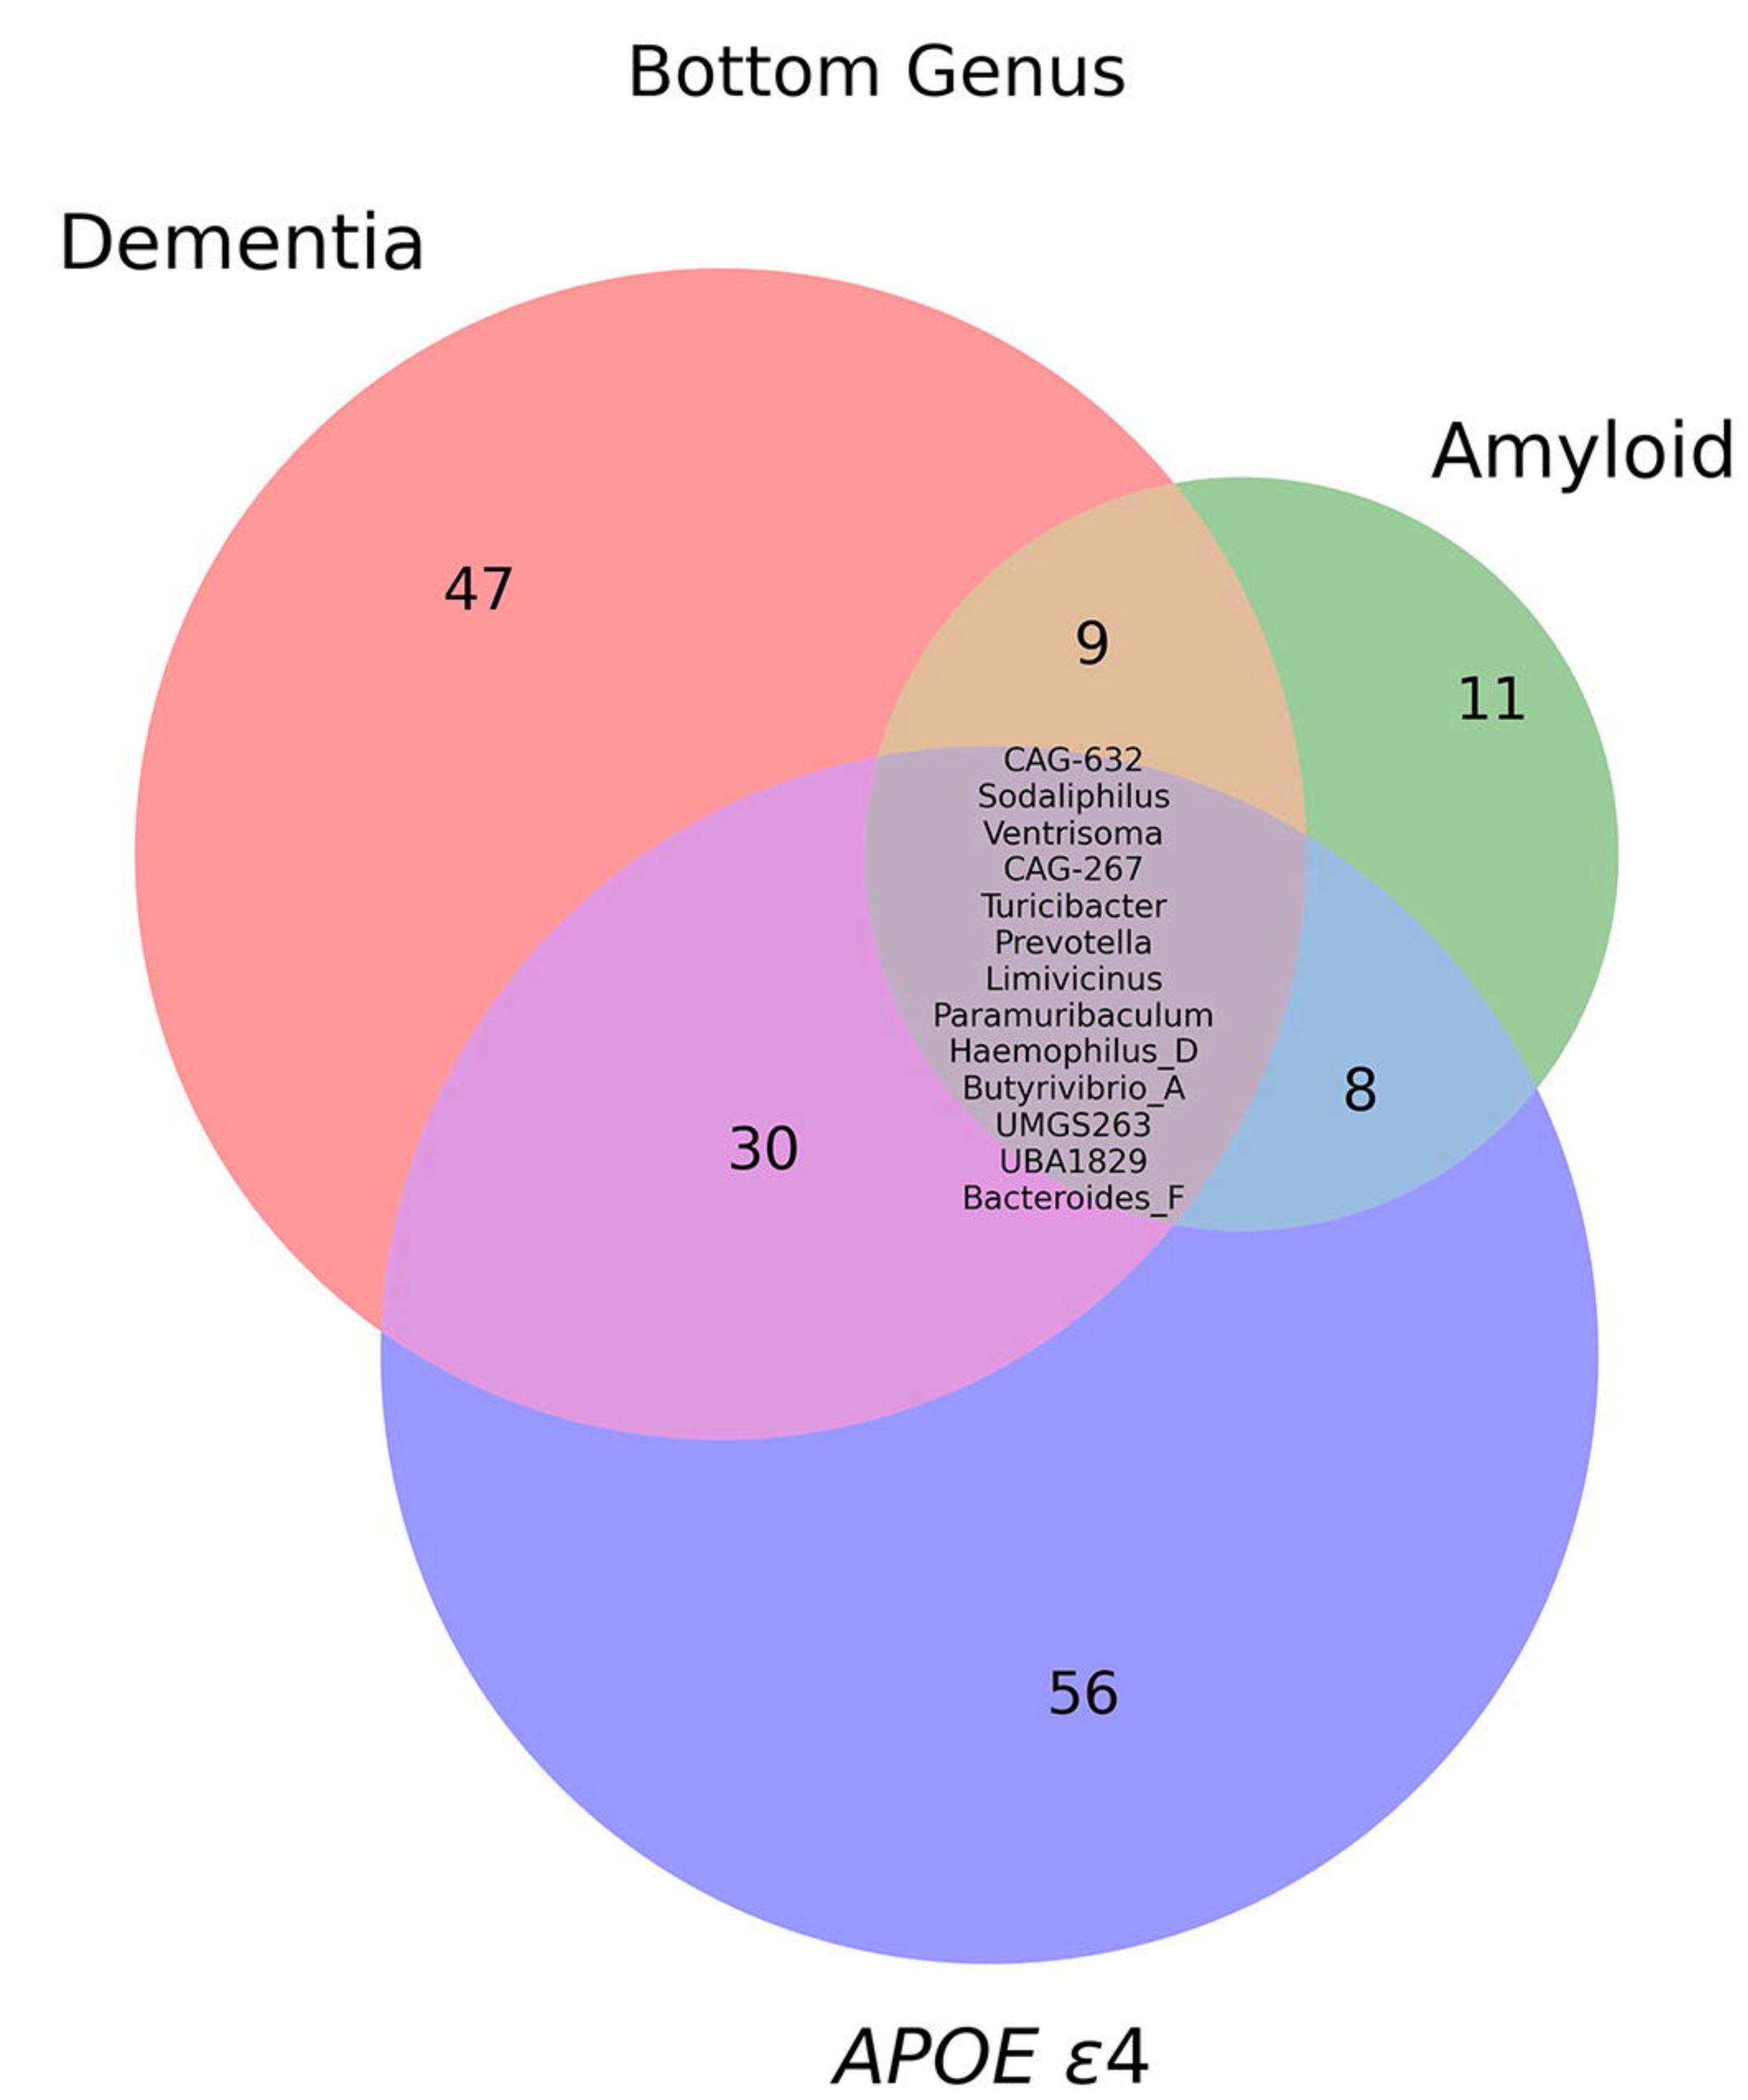

(G)

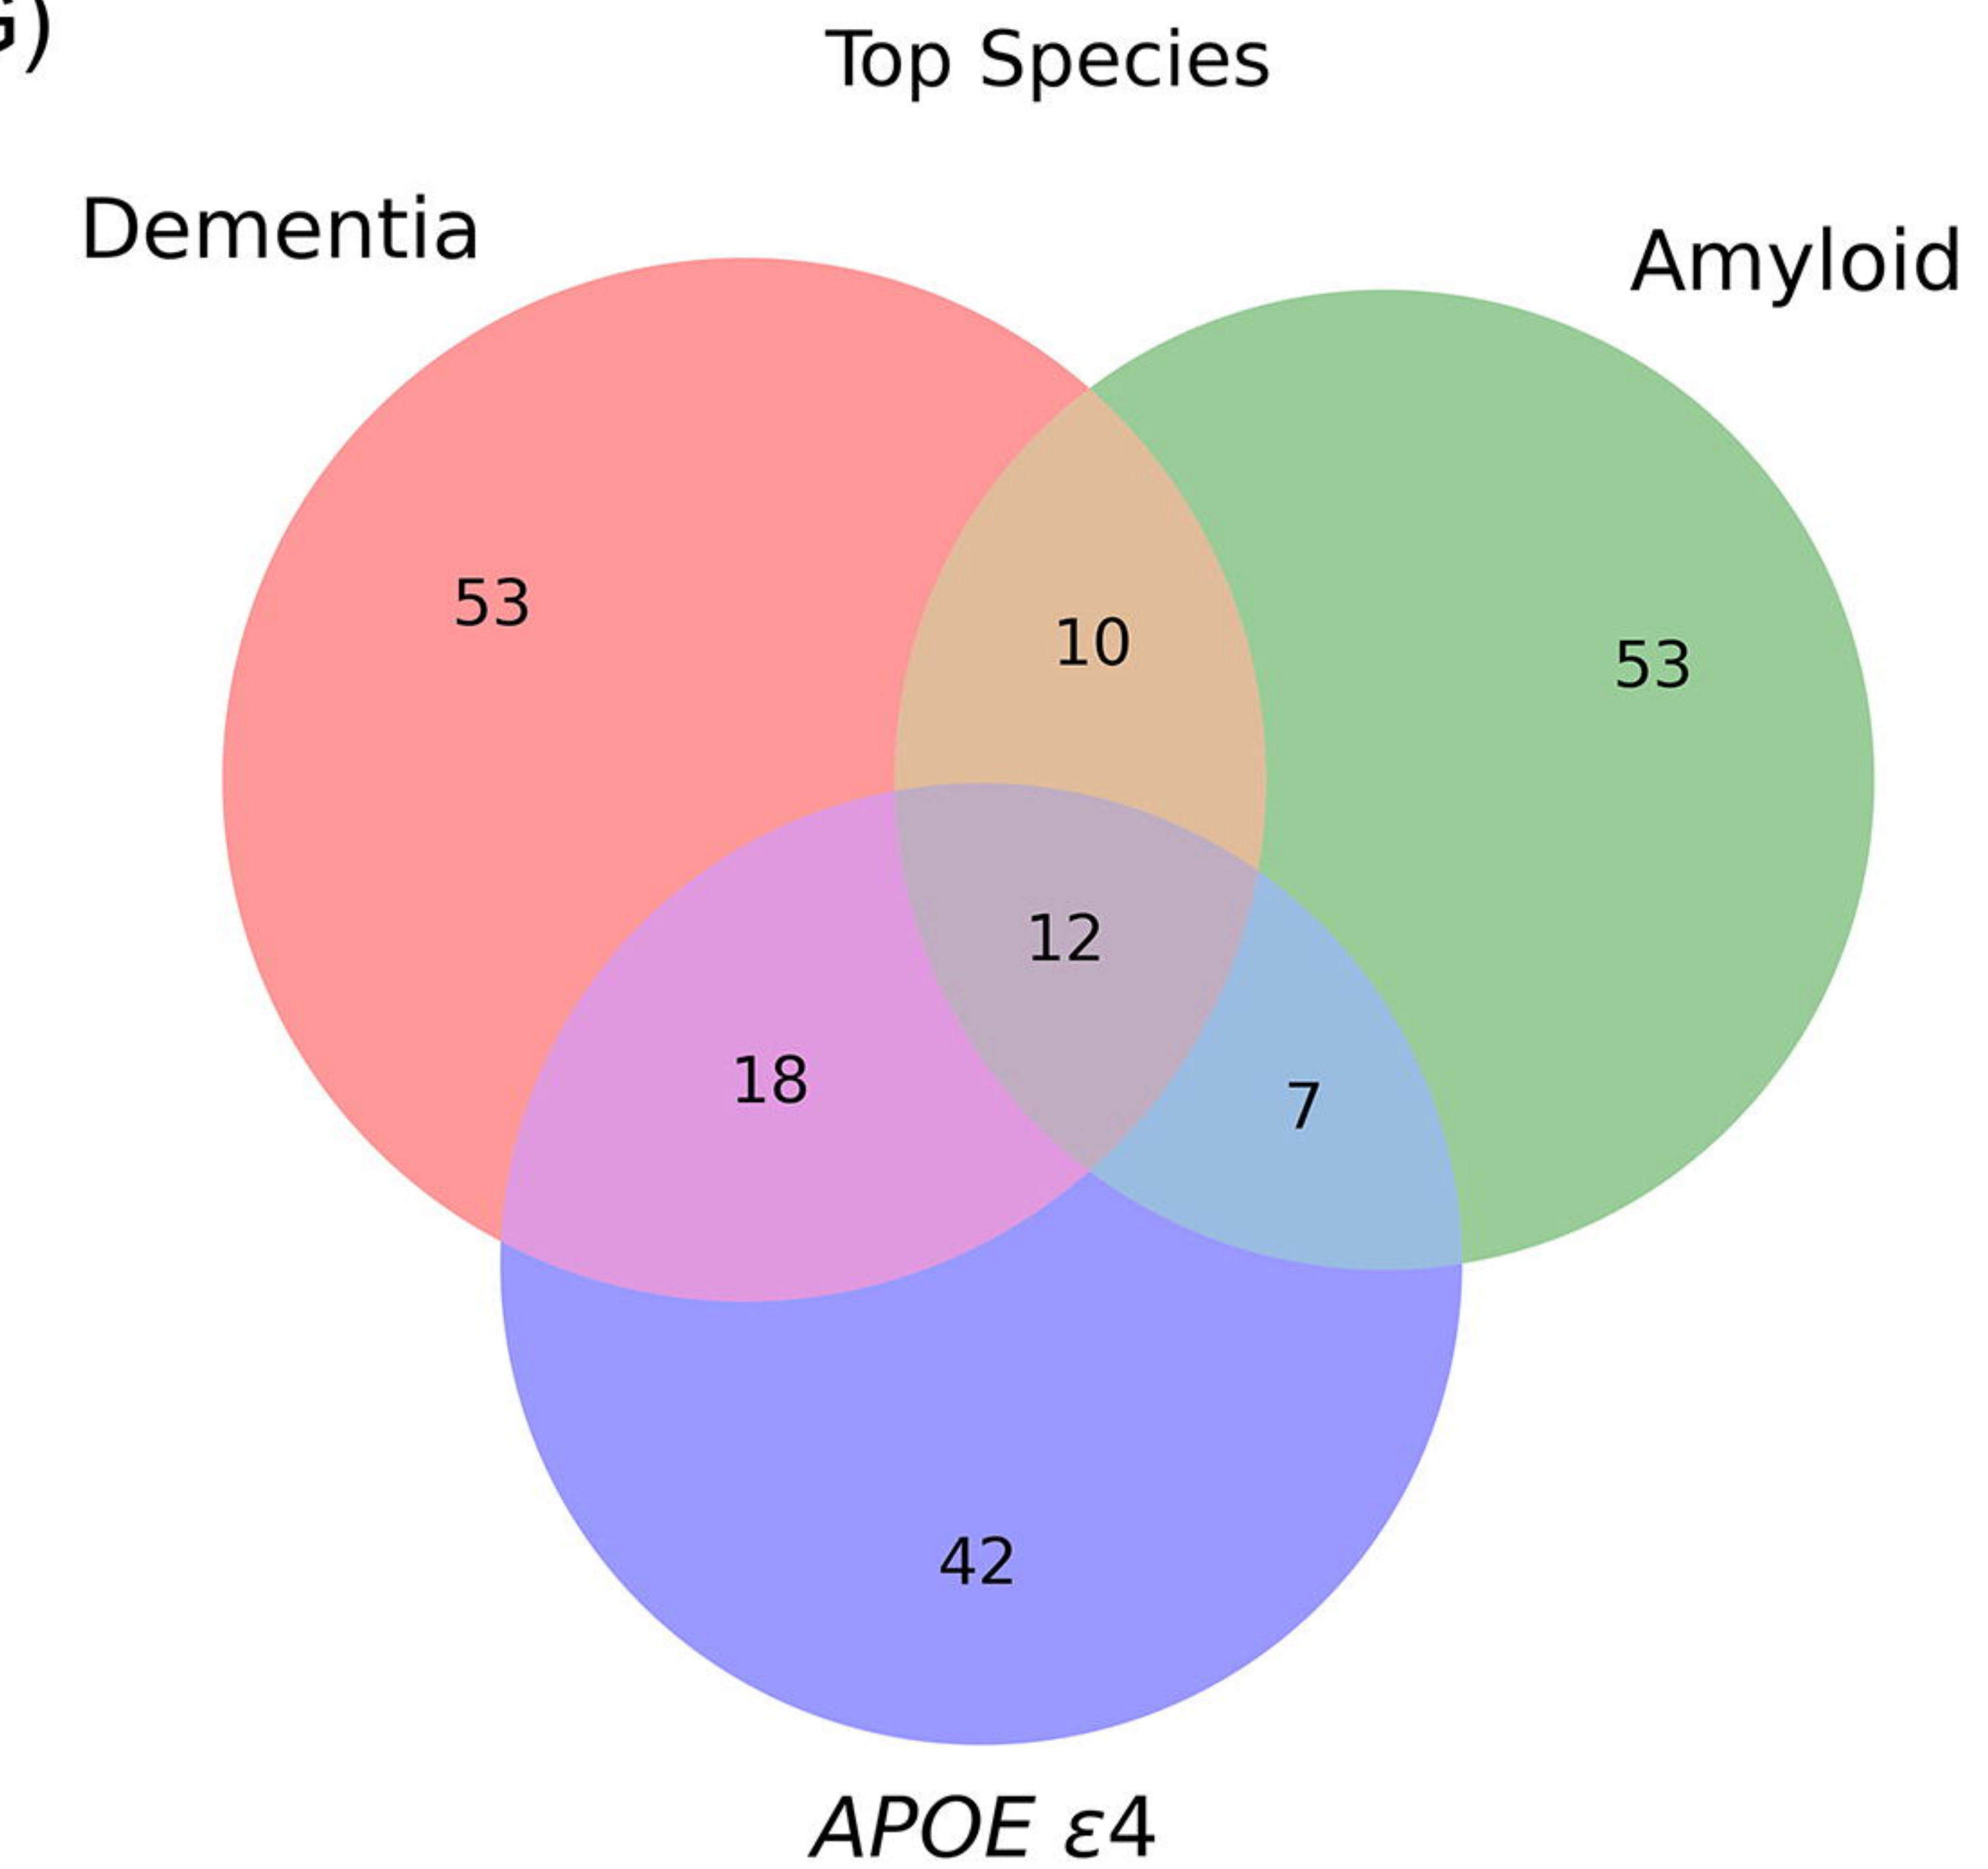

(H)

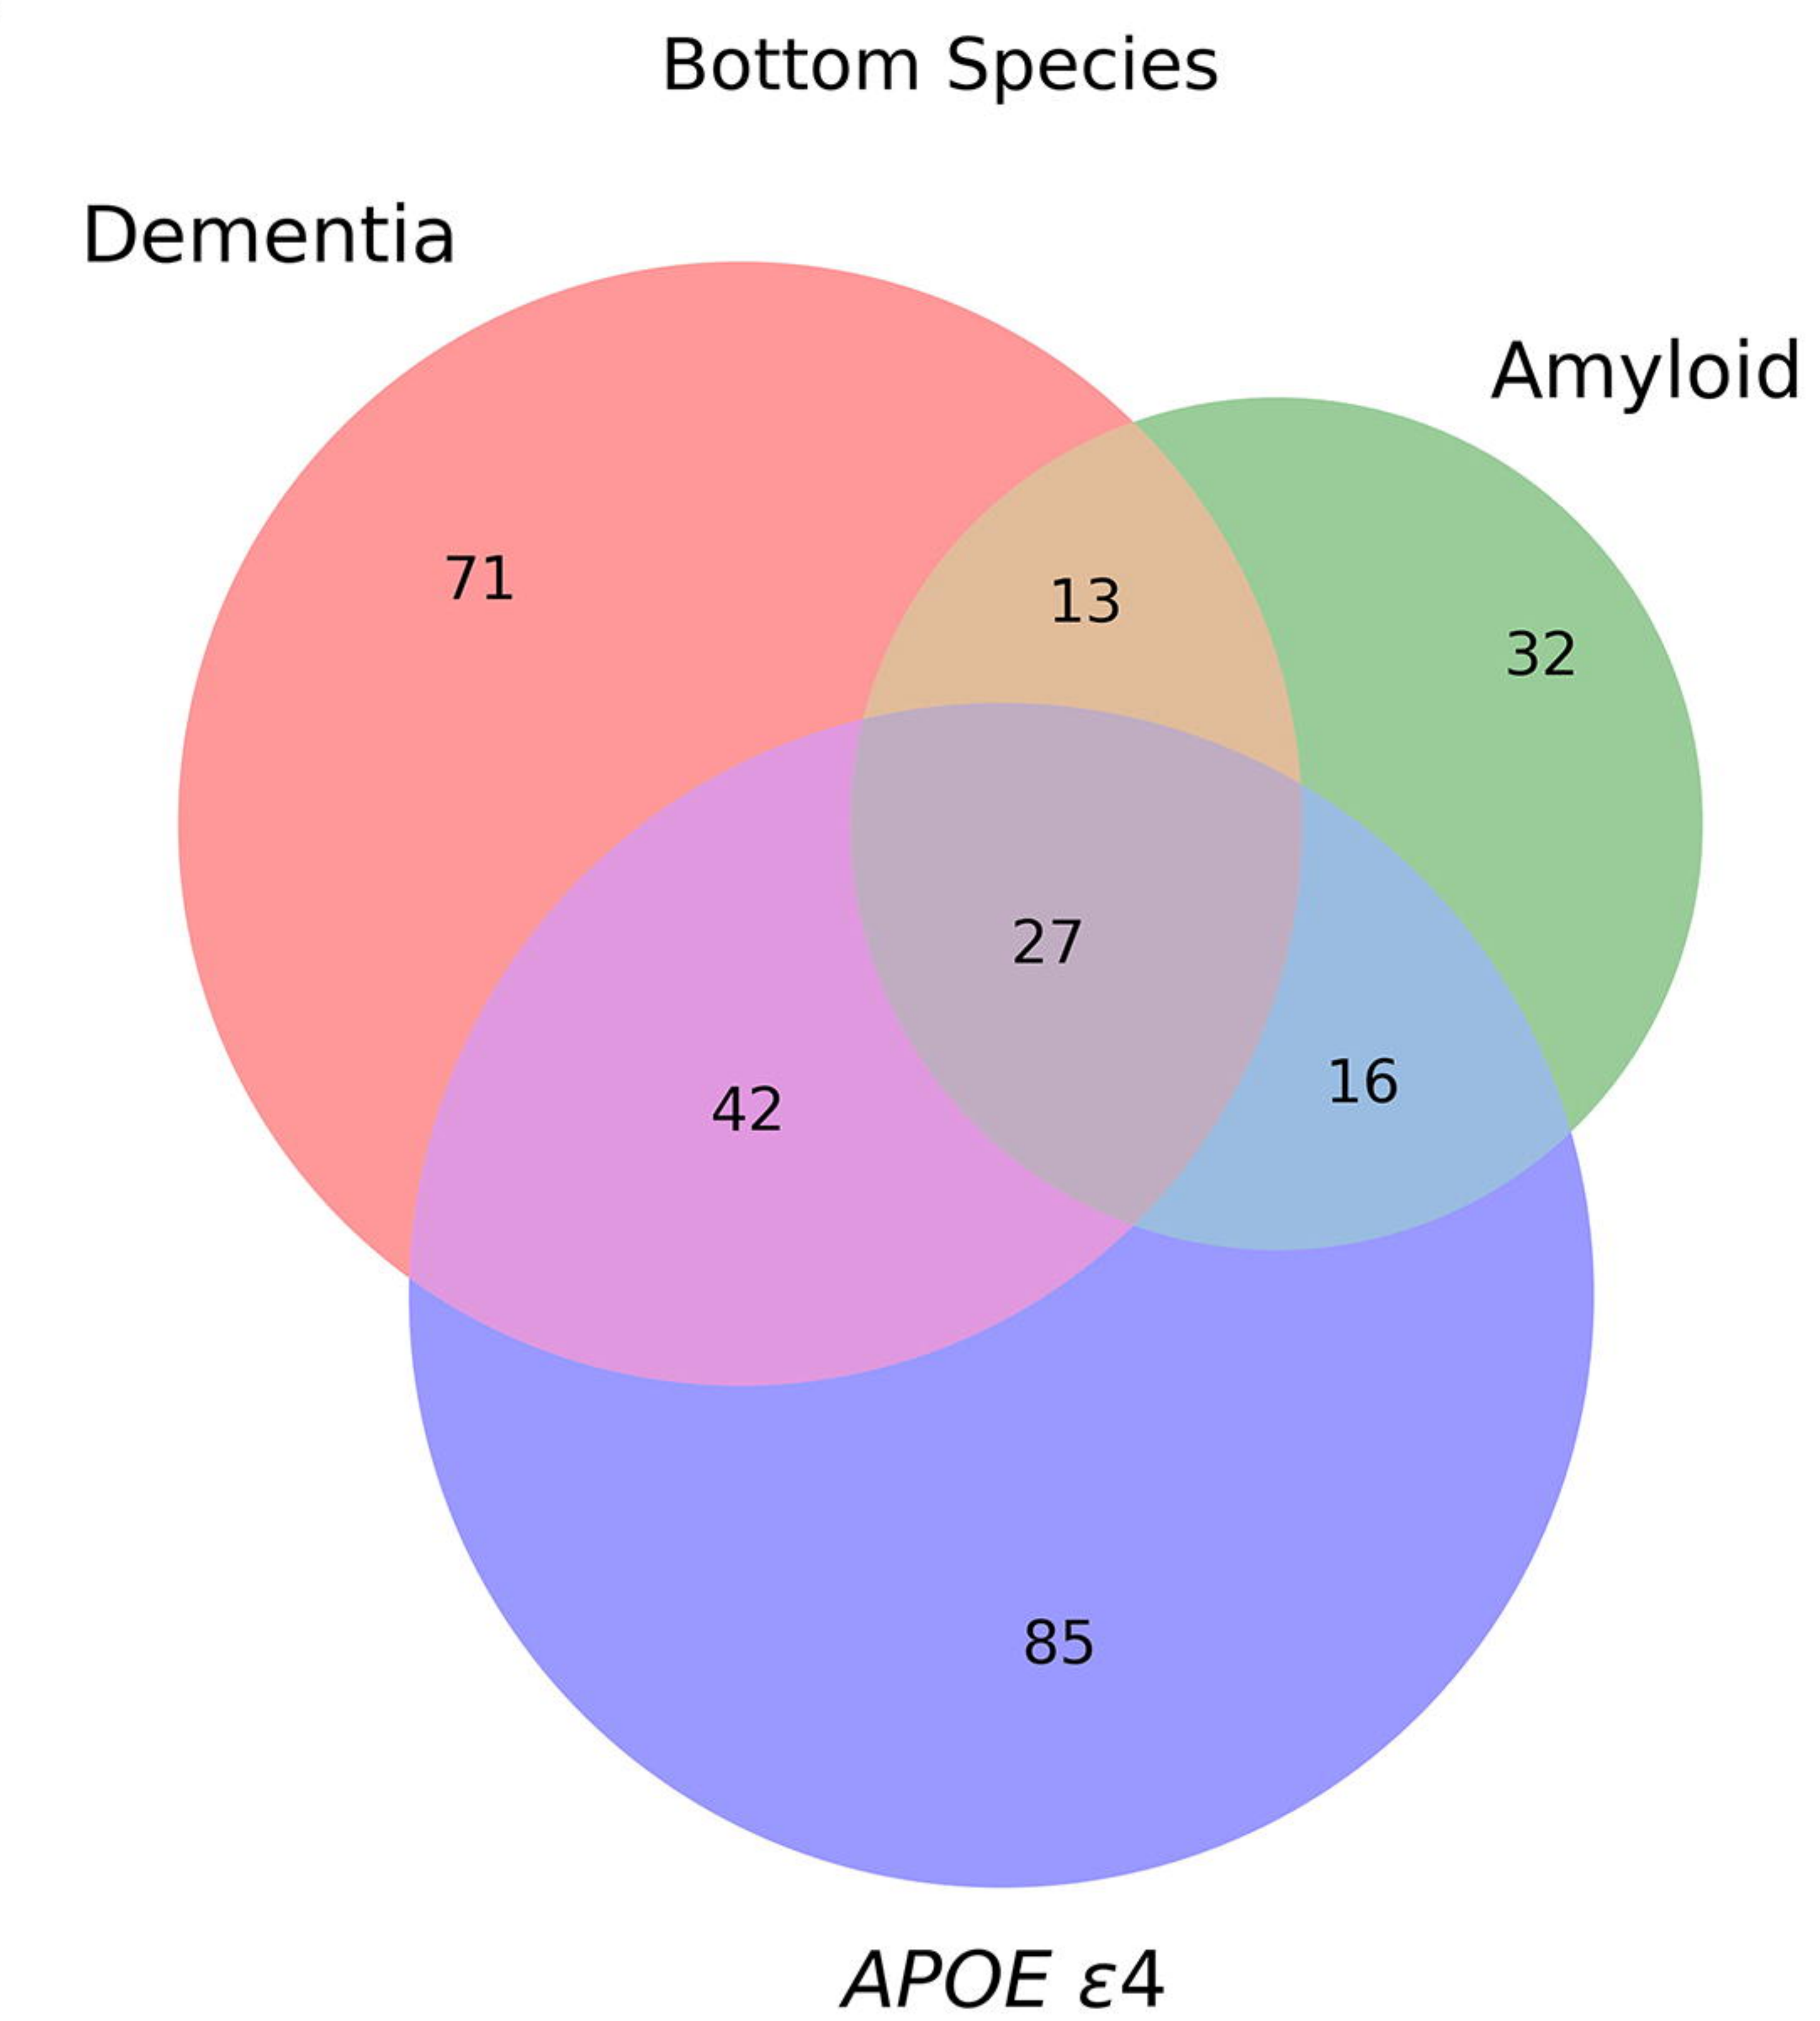

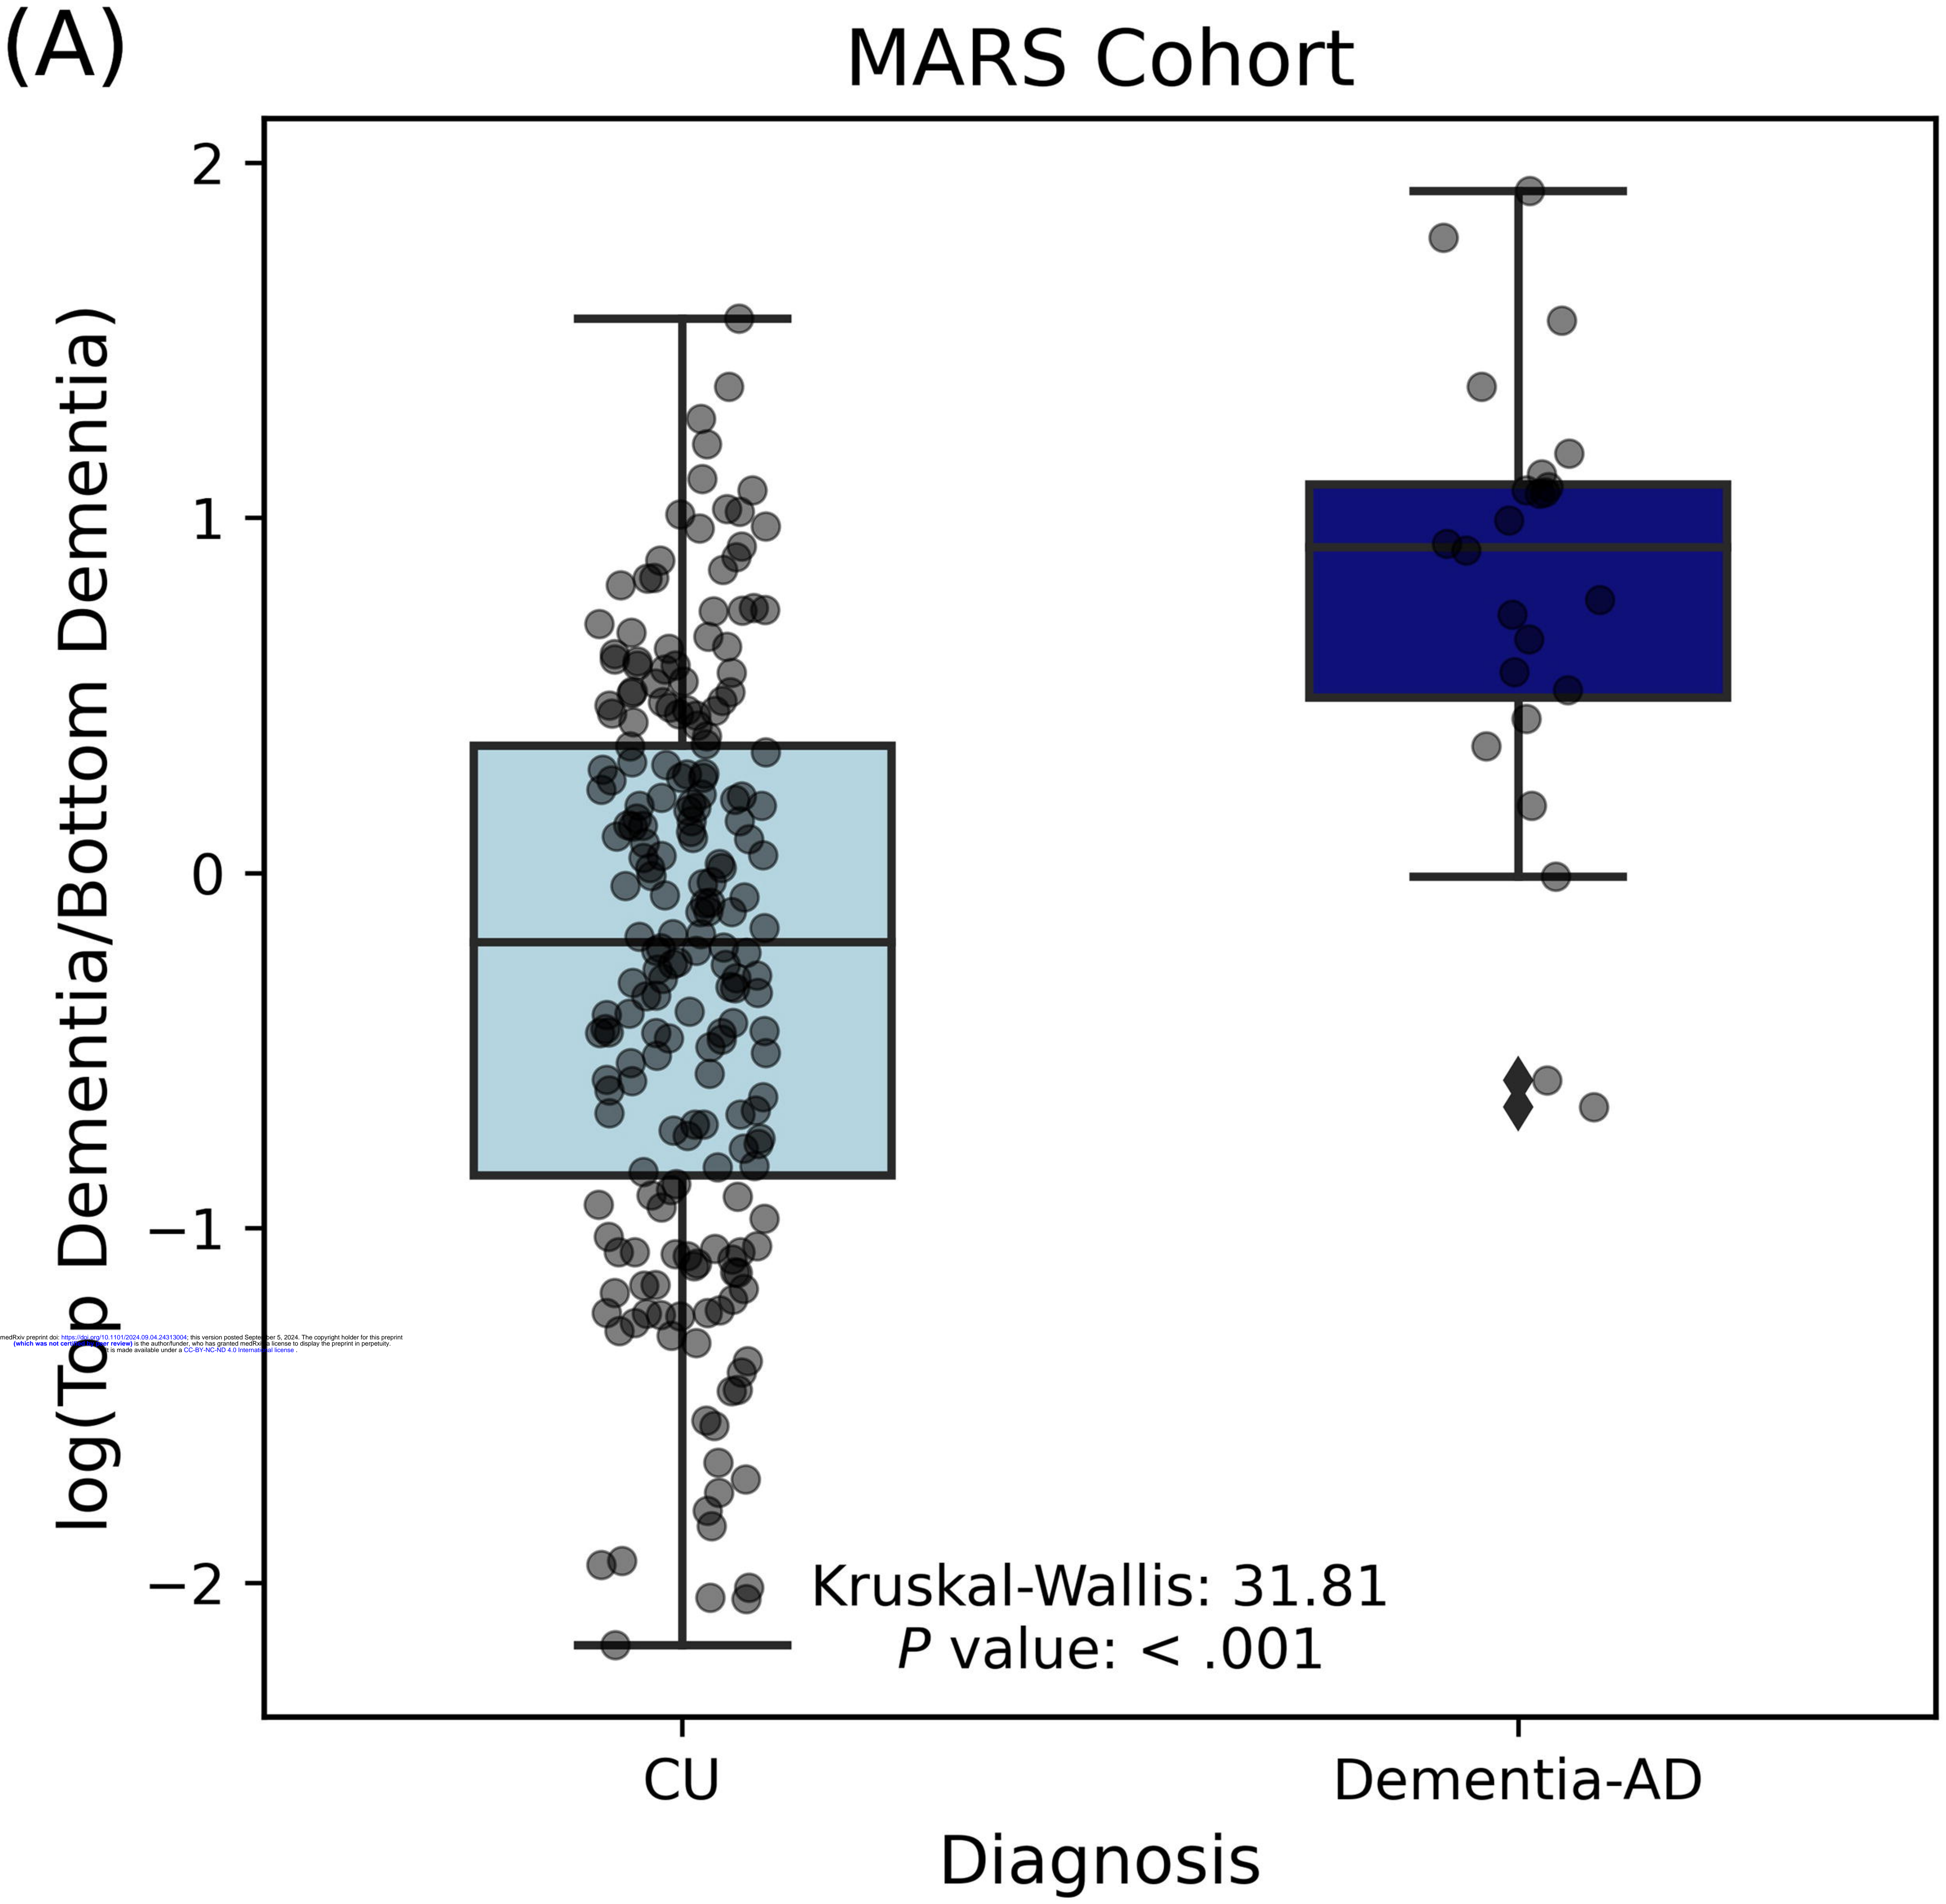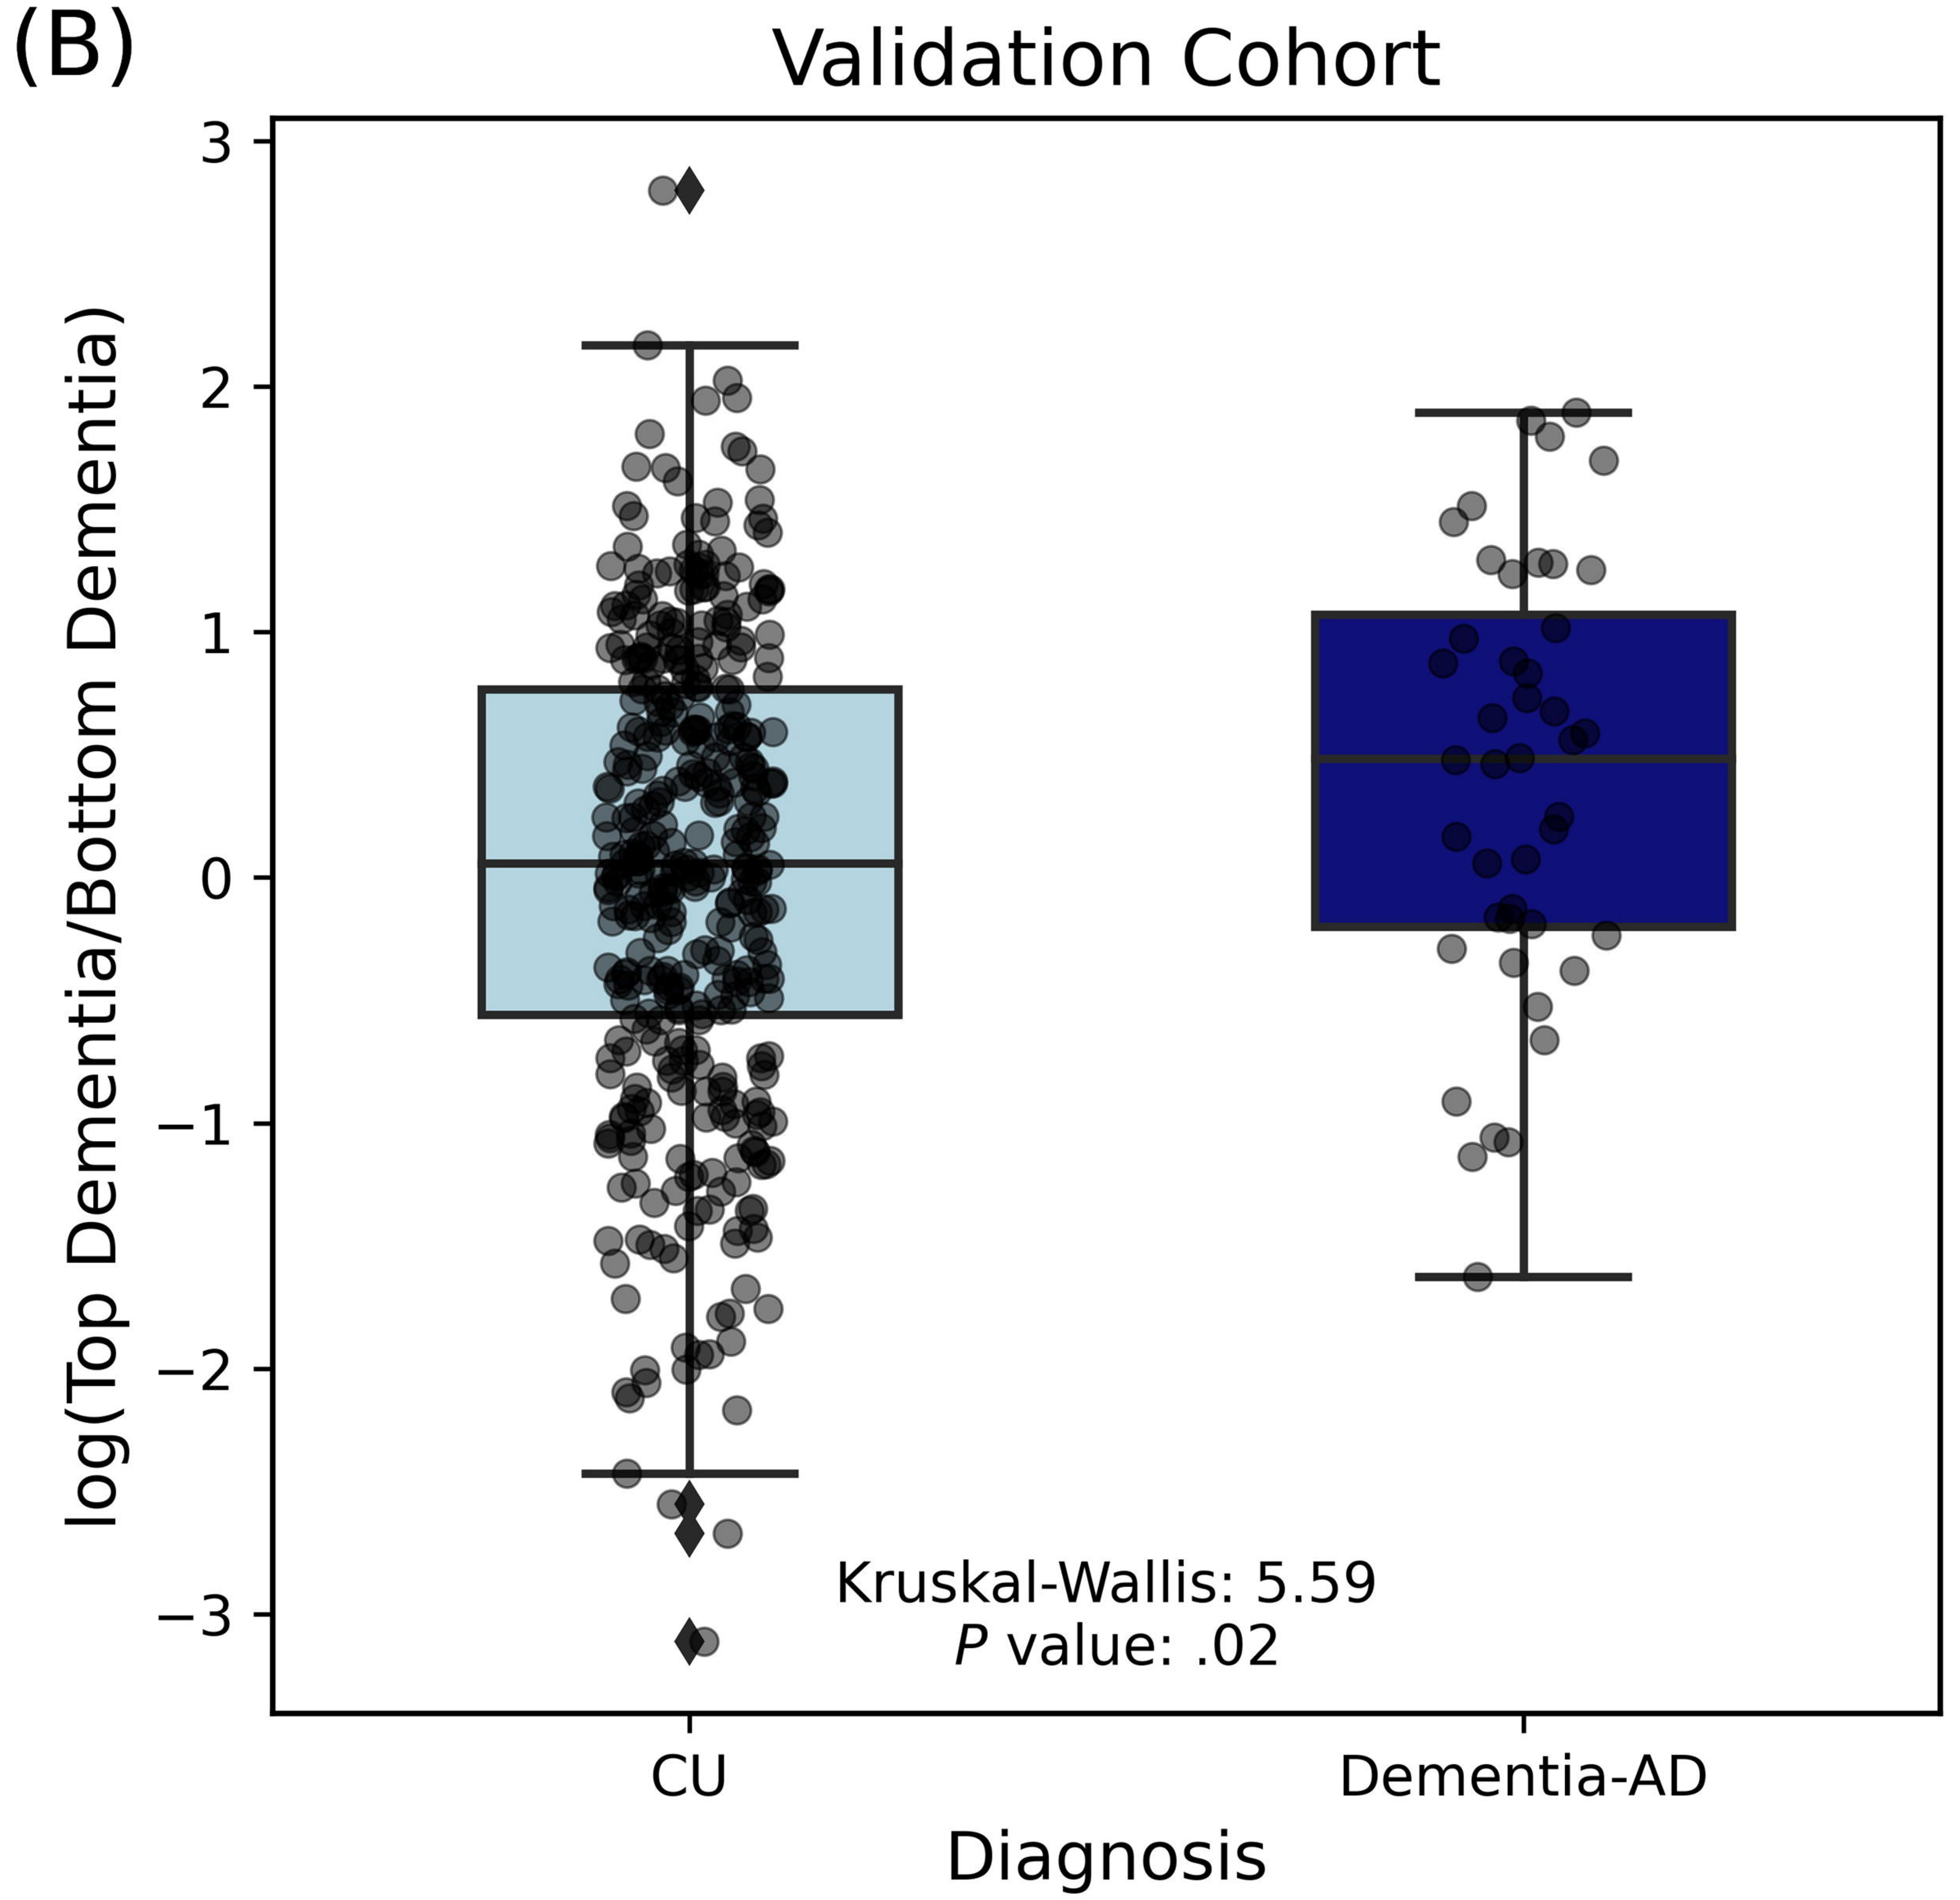

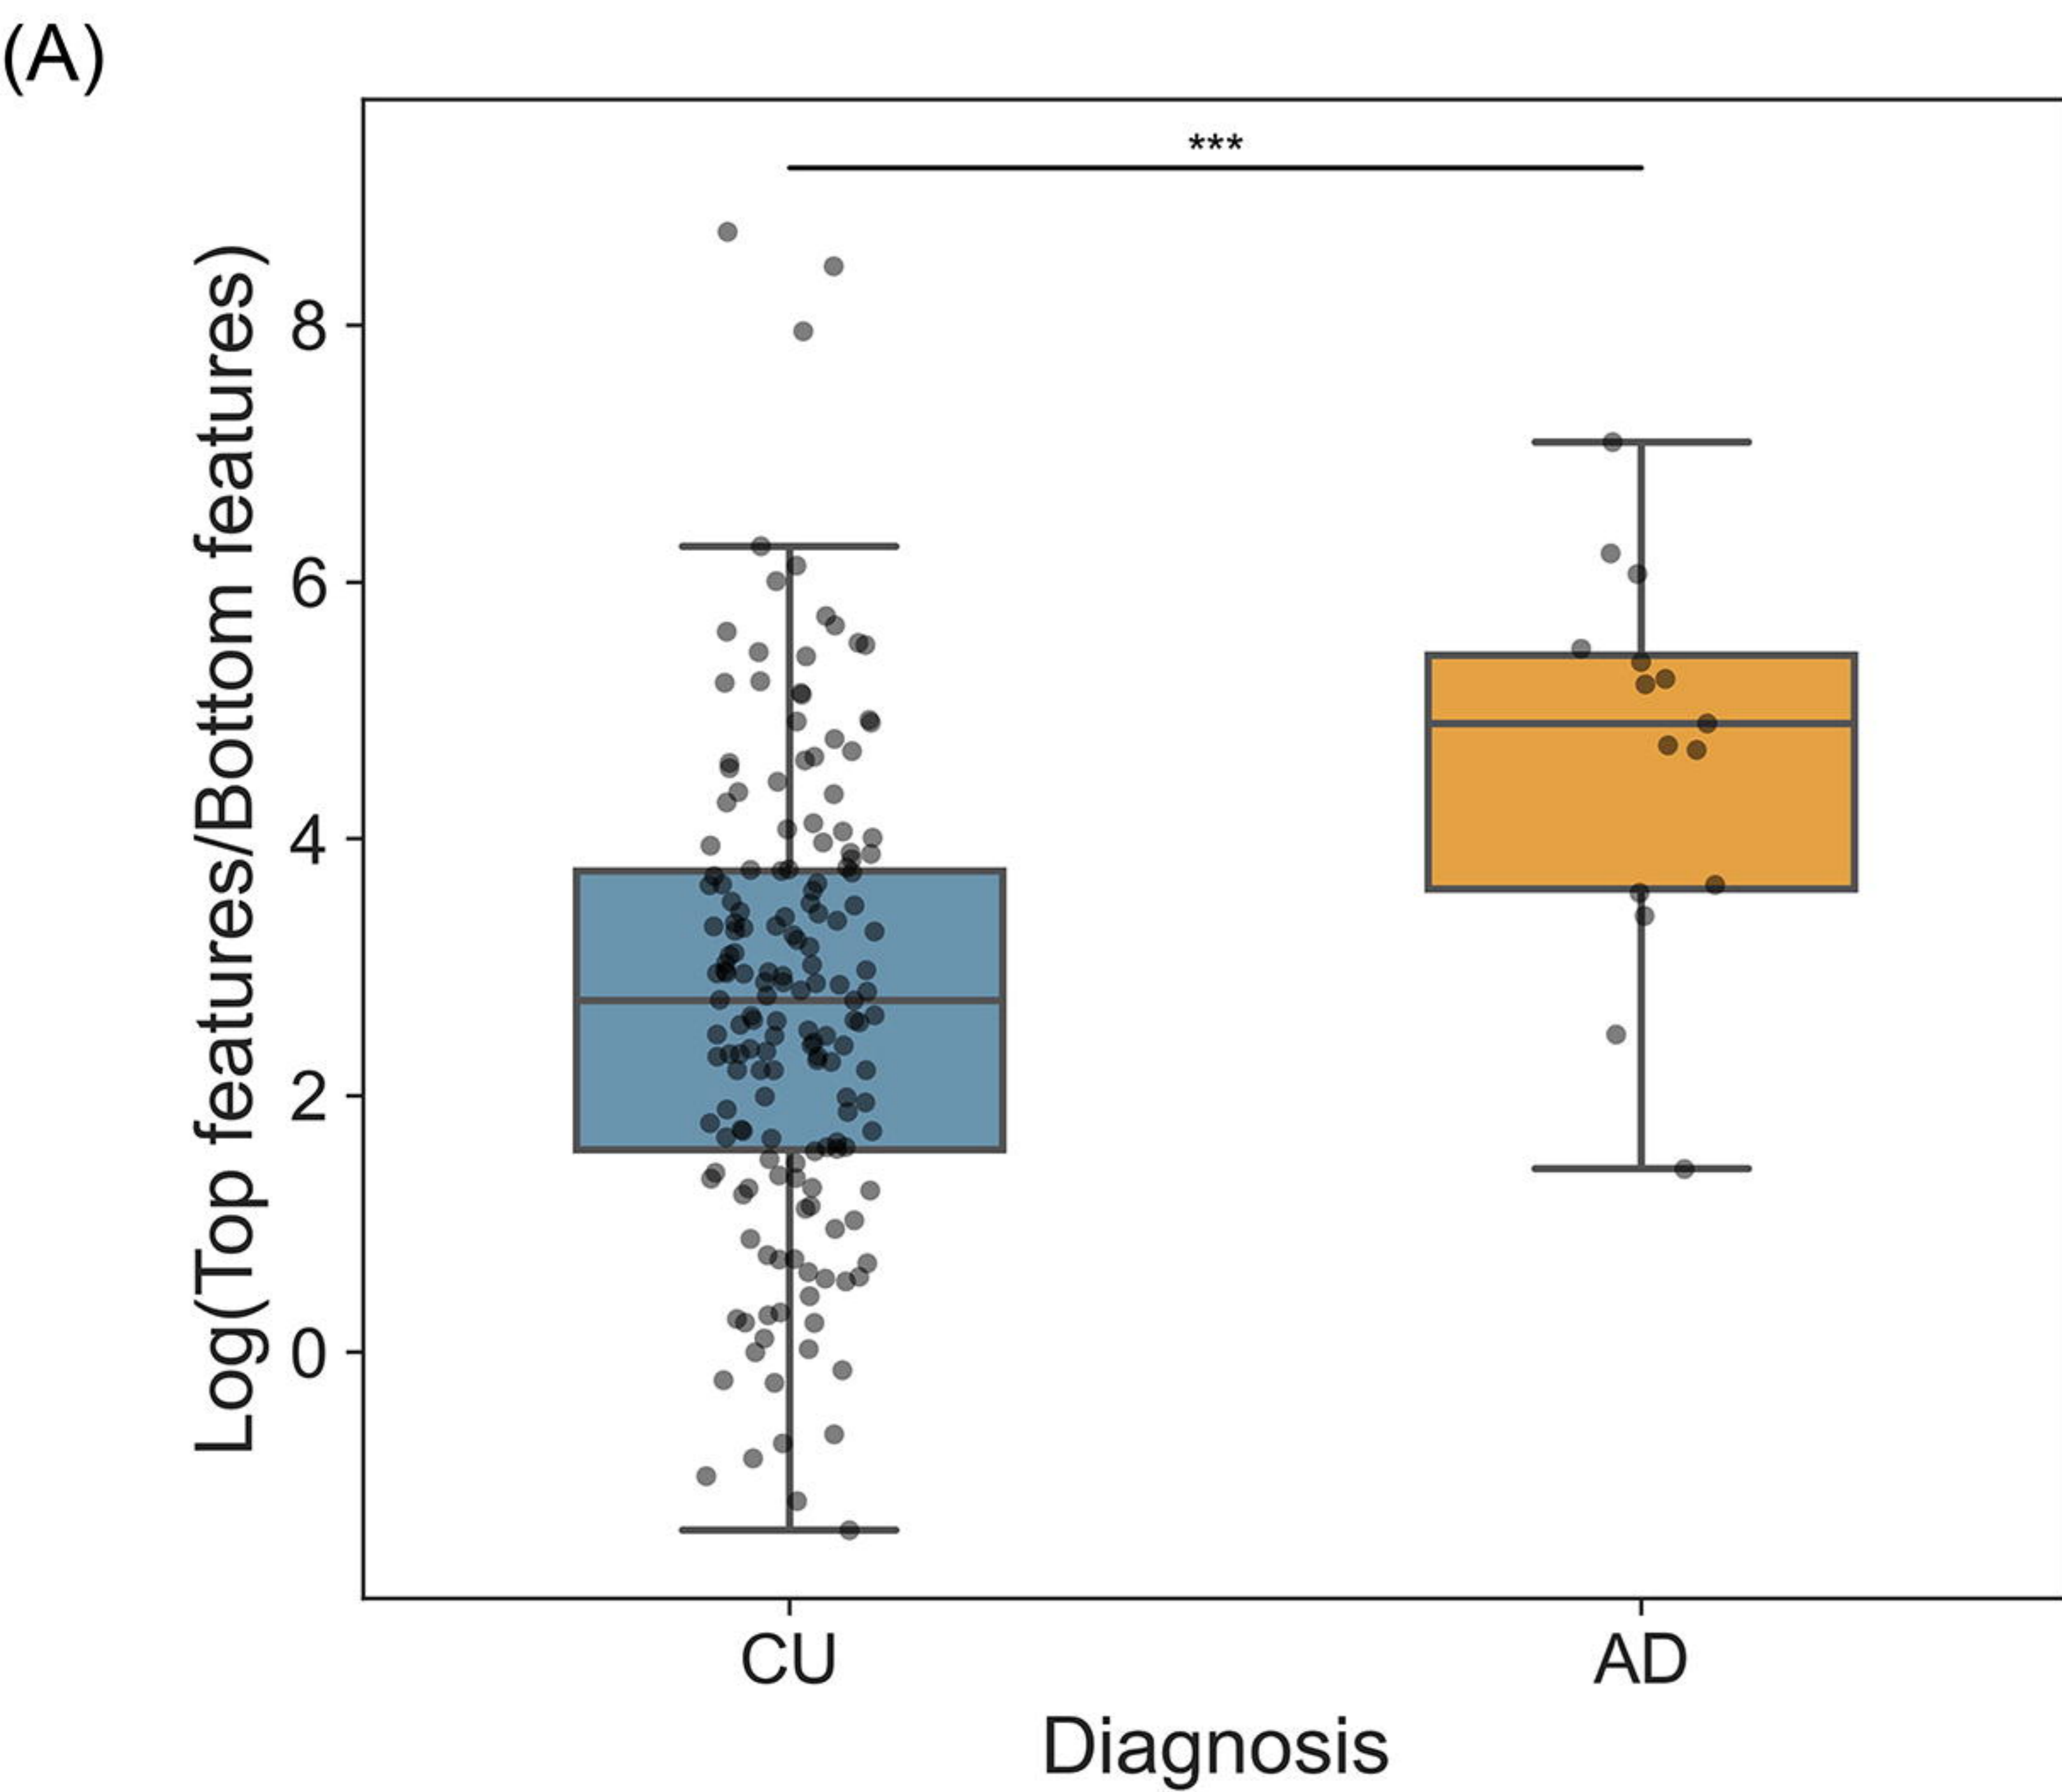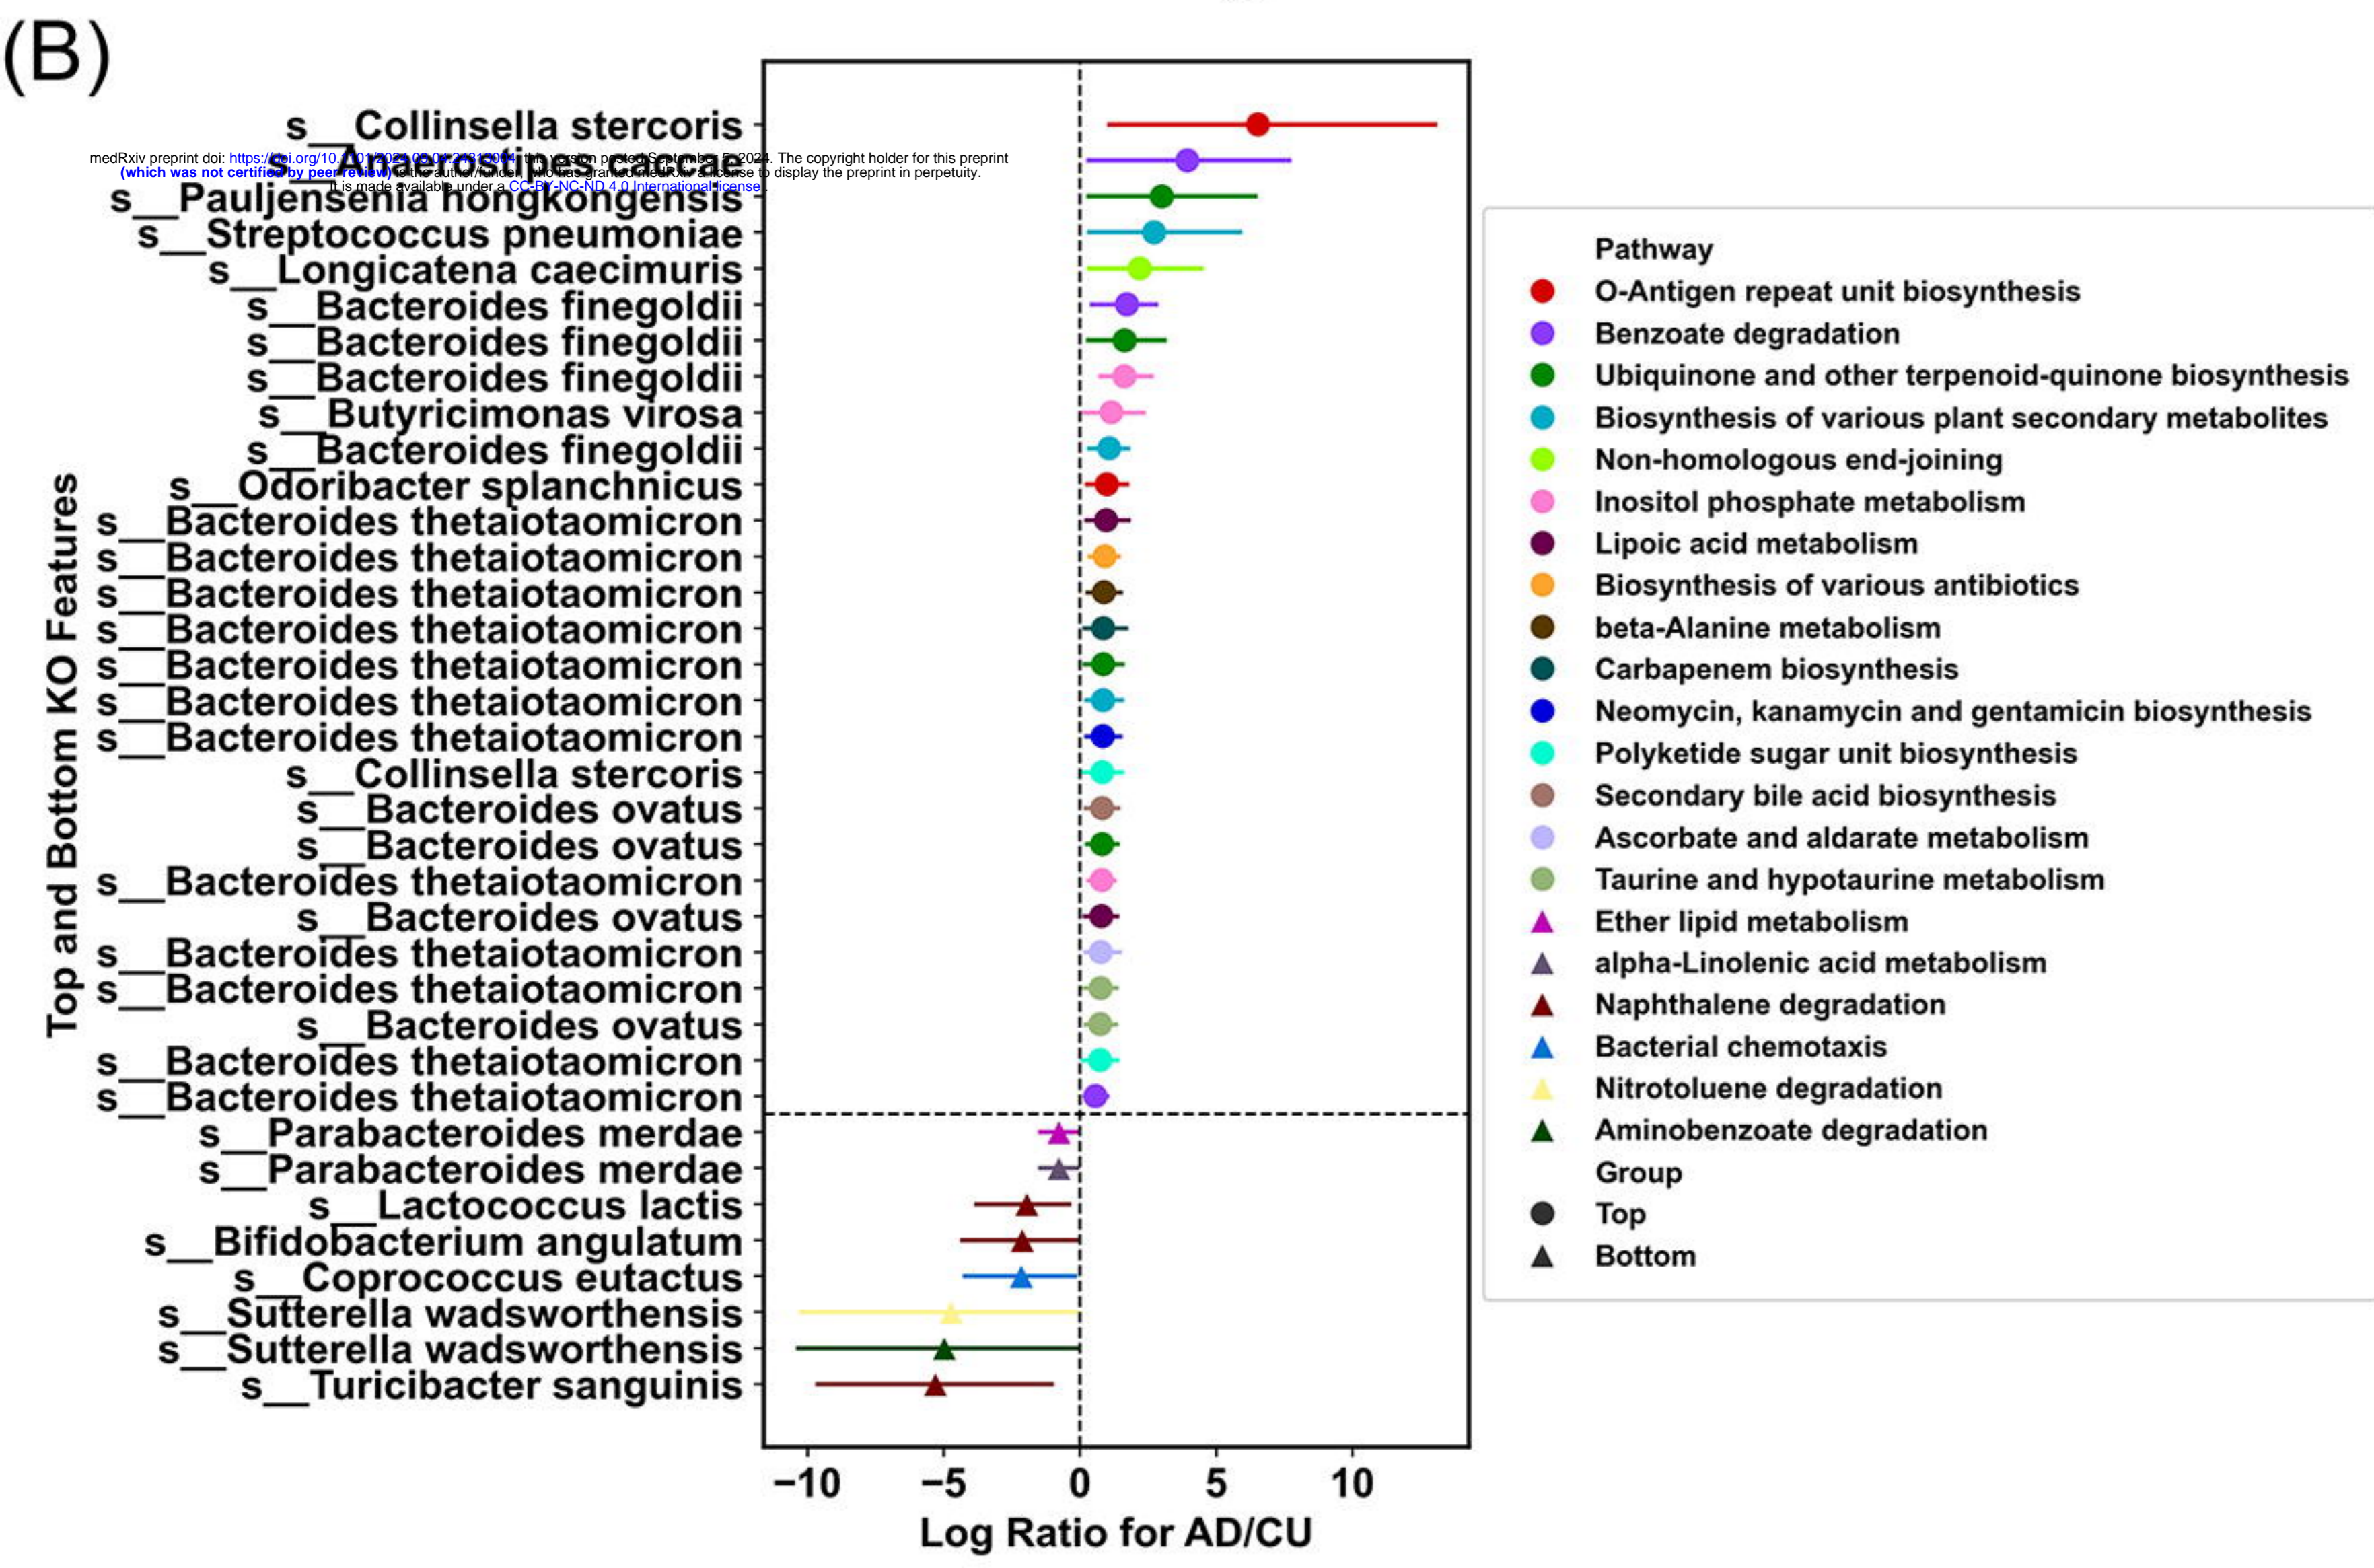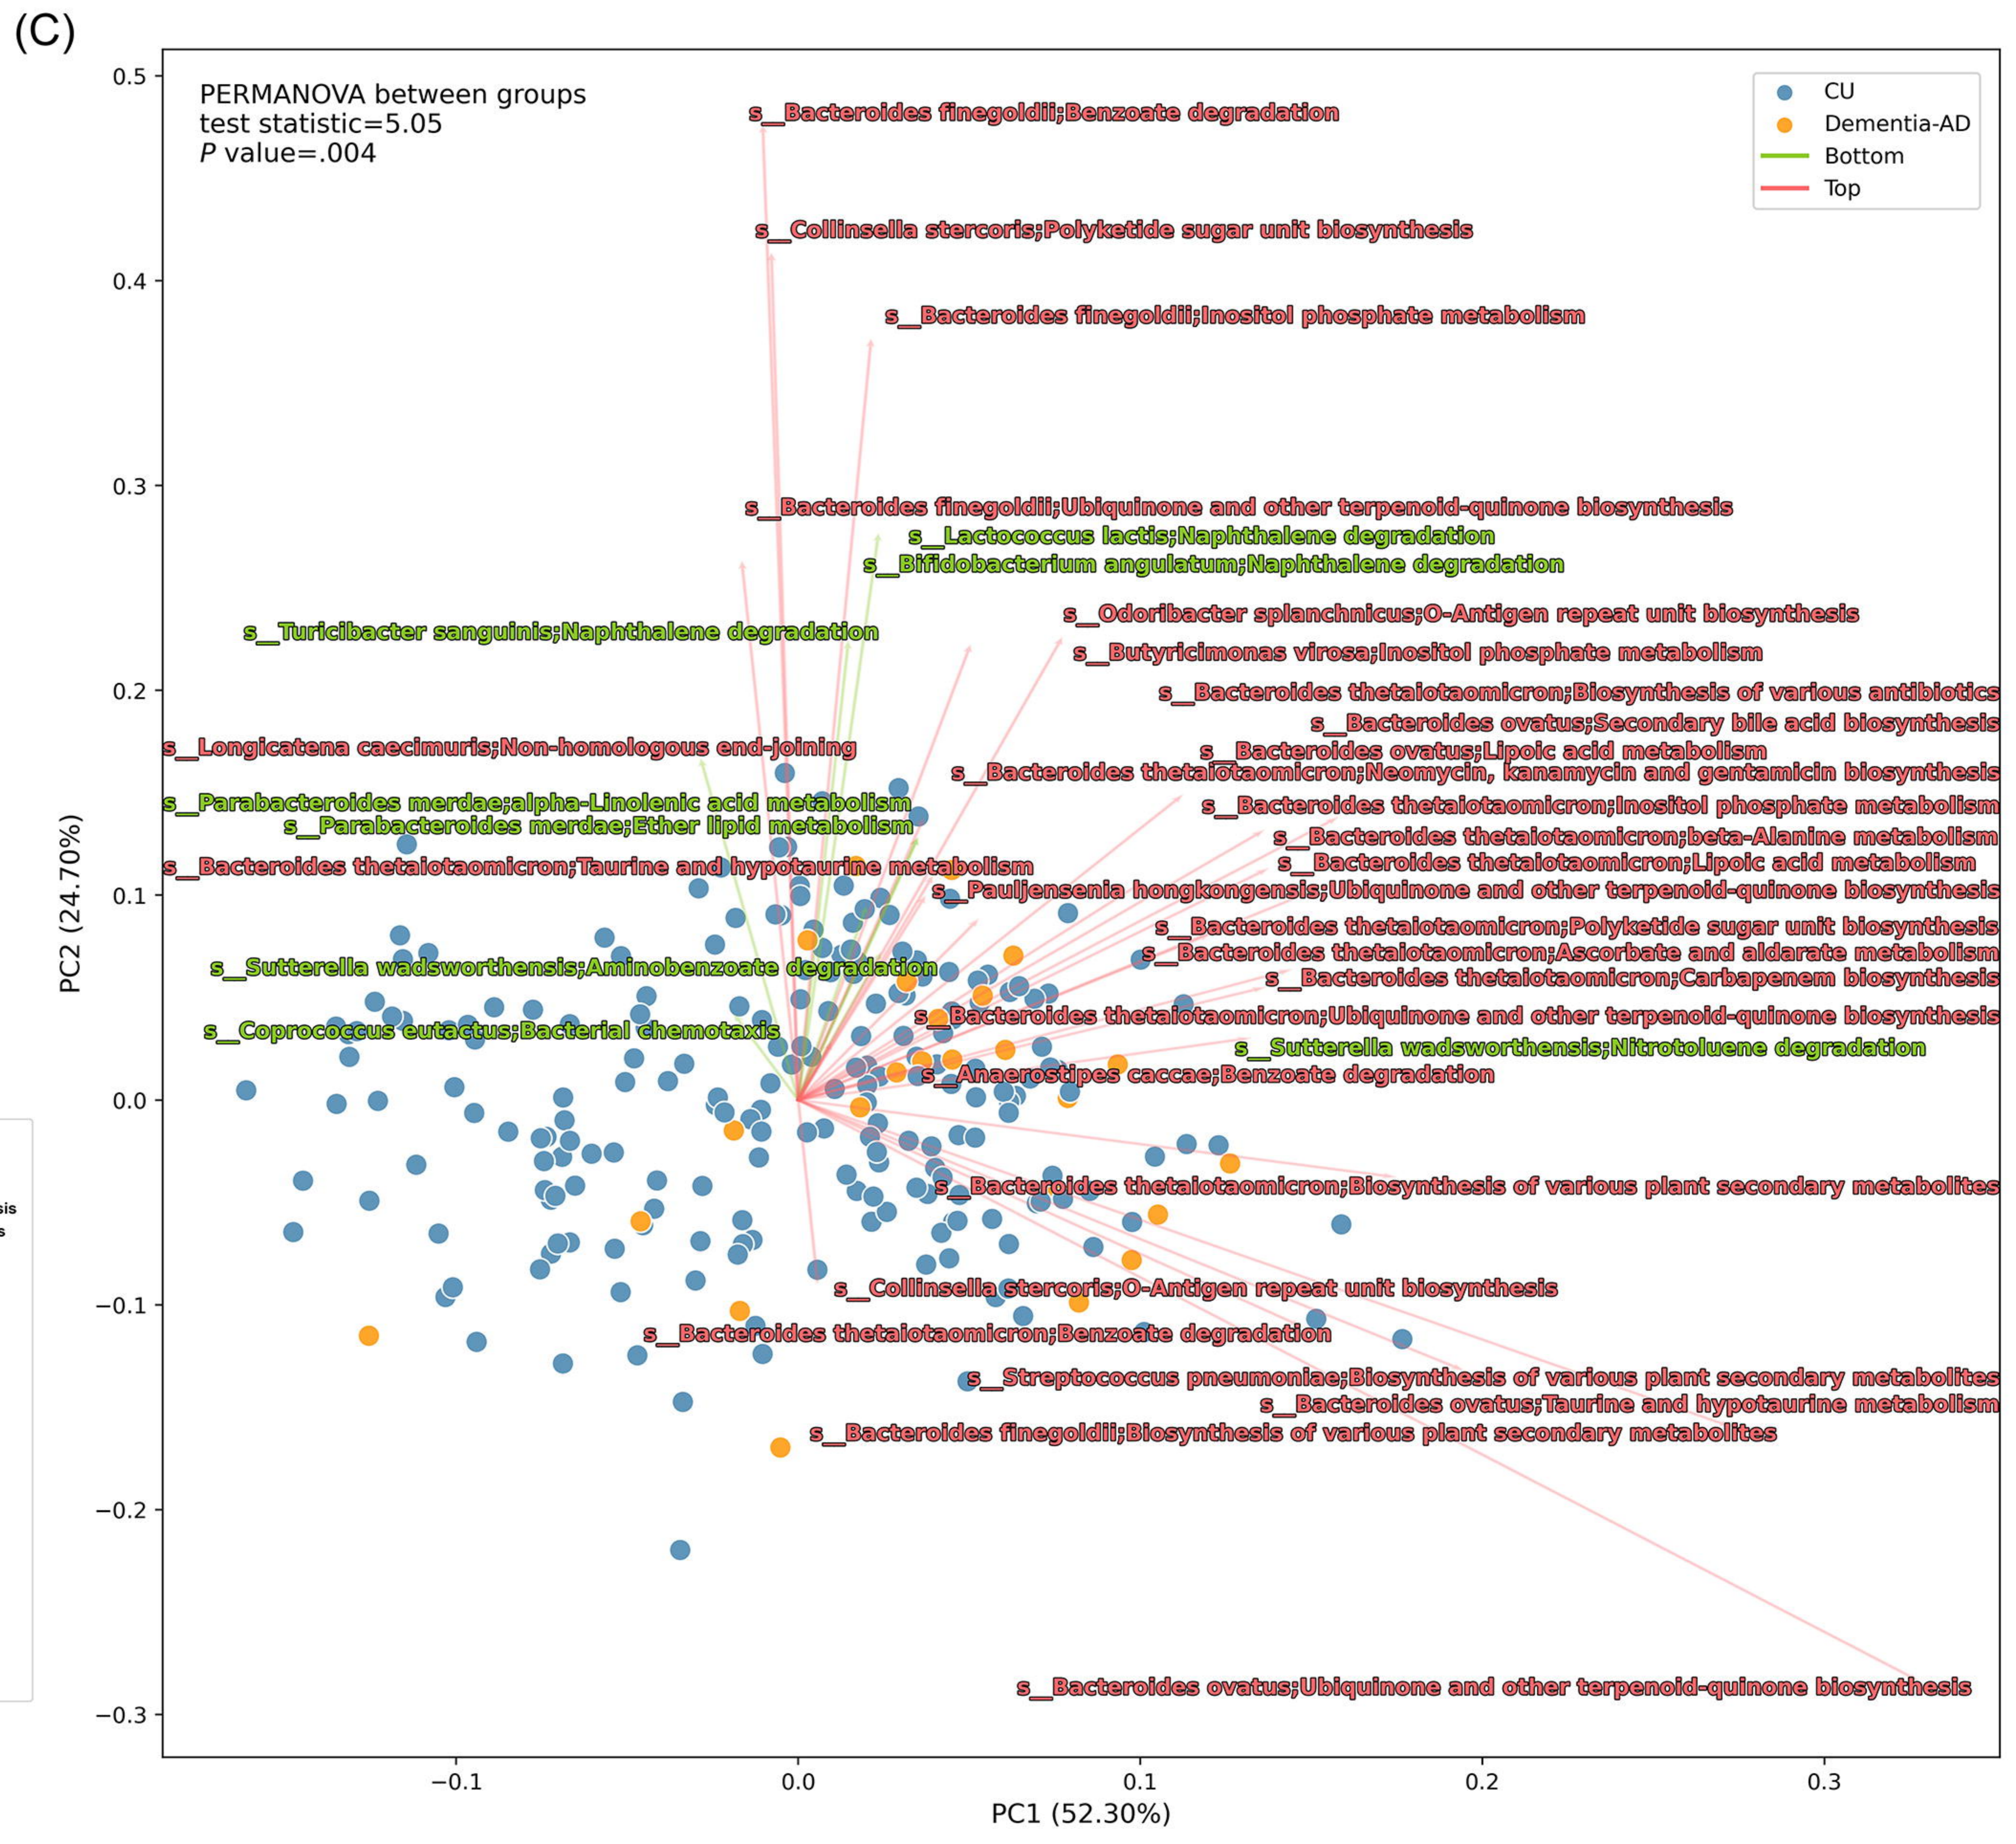

(A)

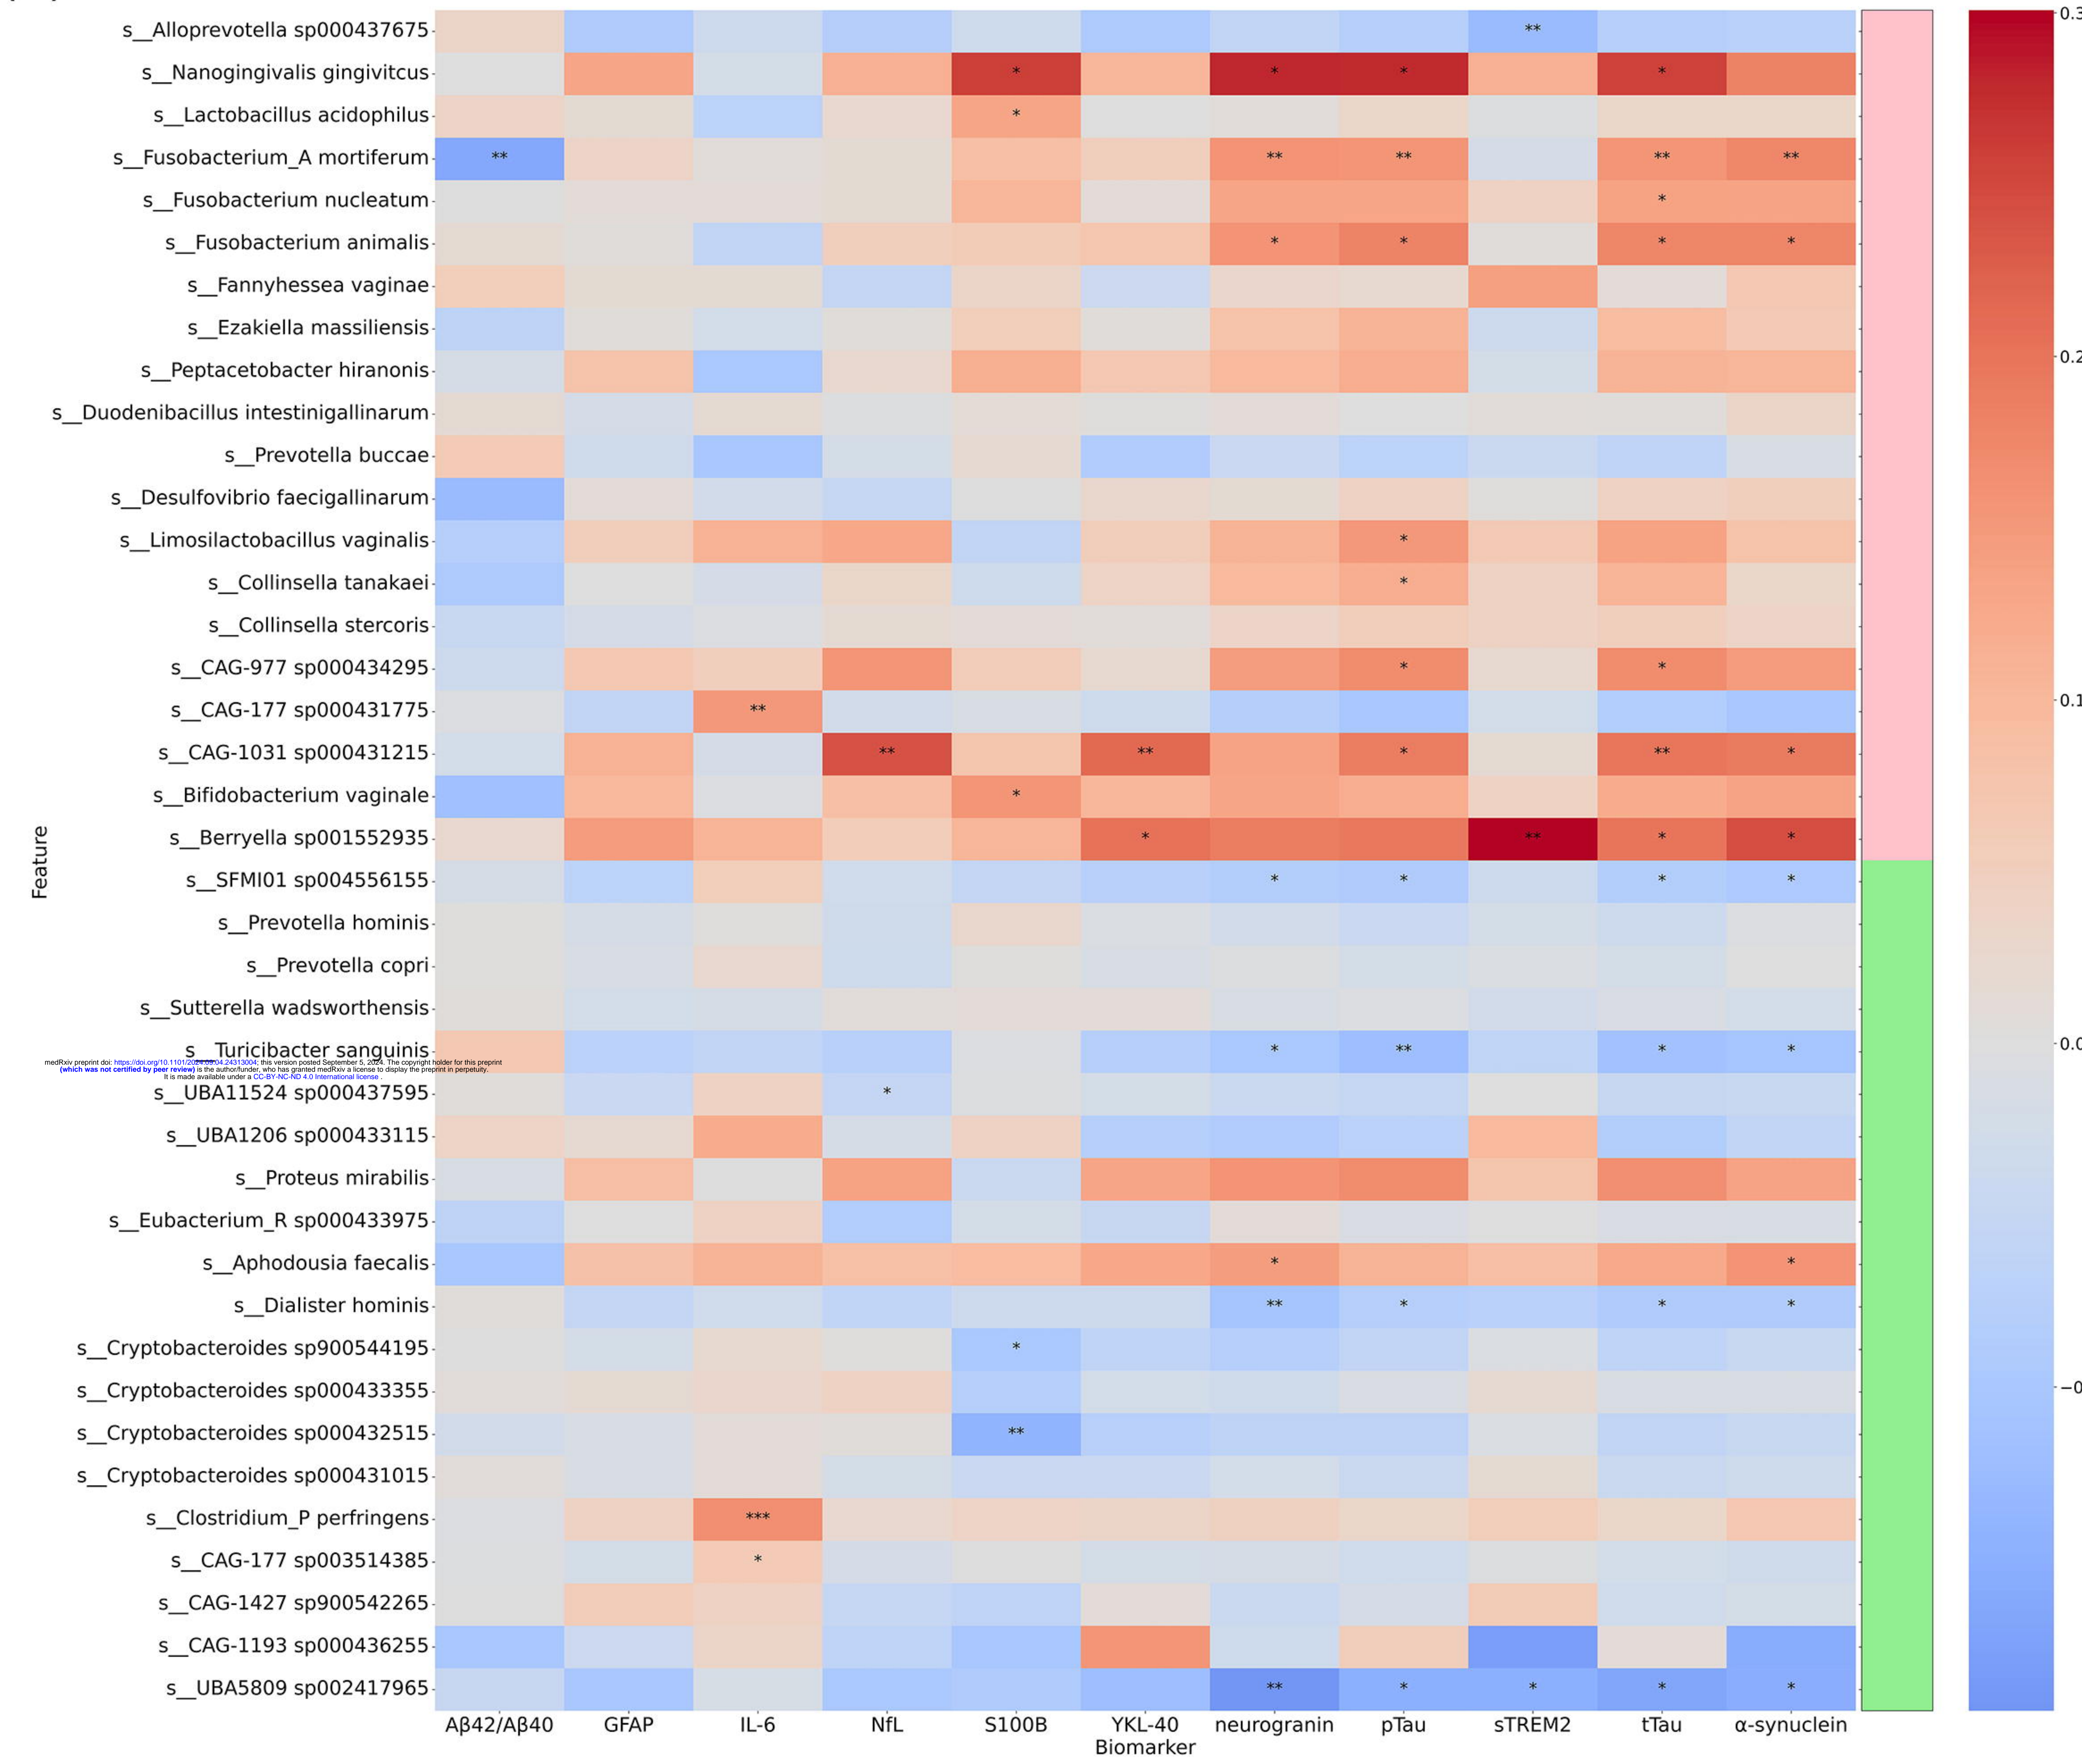

(B)

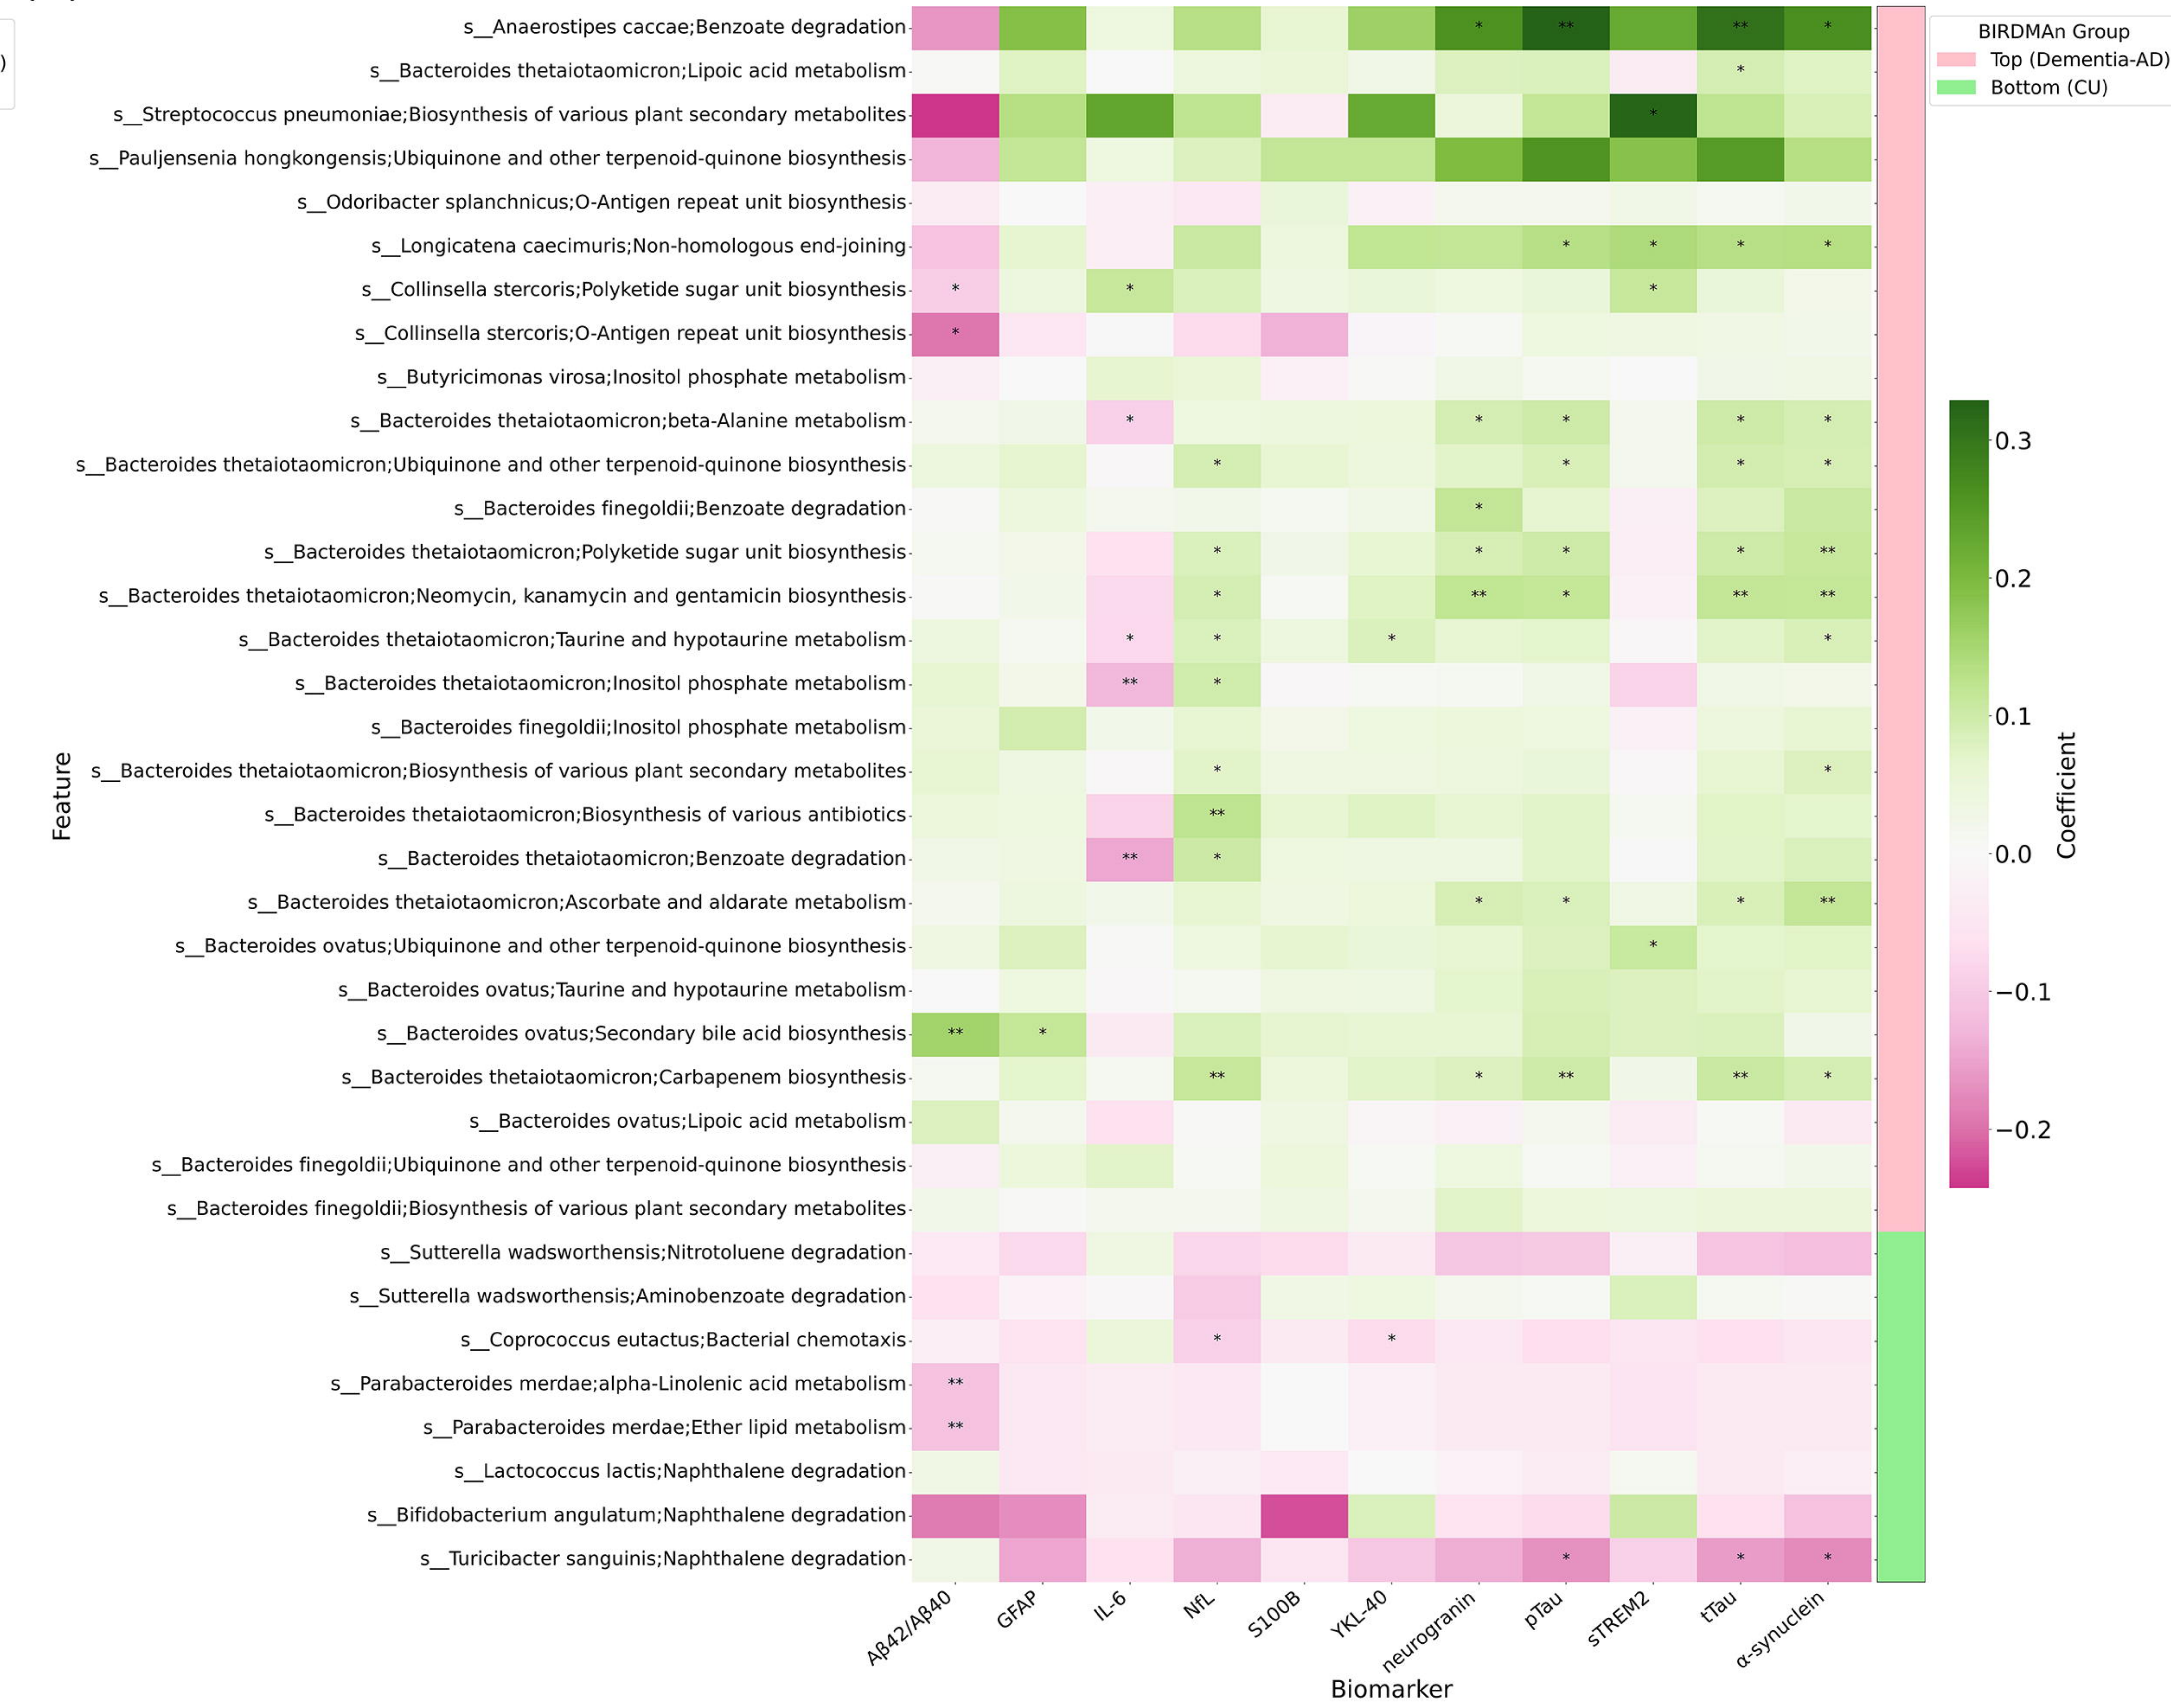

Source: https://medrxiv.org/content/medrxiv/early/2024/09/05/2024.09.04.24313004.full.pdf
